# Supplementary material for: Mechanism of palladium-catalyzed allylic substitution of tertiary allylic carbonates with sodium sulfinates: unusual bifunctional nucleophile-enabled inner-sphere pathway and origin of regio- and enantioselectivities
Source: Royal Society of Chemistry journal article supplement (doi:10.1039/d3cy01493b), 2024-01-01
Supplement: d3cy01493b1.pdf [file d3cy01493b1.pdf]

Supporting Information for:

**Mechanism of Palladium-Catalyzed Allylic Substitution of Tertiary  
Allylic Carbonates with Sodium Sulfinates: Unusual Bifunctional  
Nucleophile-Enabled Inner-Sphere Pathway and Origin of Regio- and  
Enantioselectivities**

Hongli Wu<sup>1</sup>, Botao Wu<sup>2</sup>, Arjan W. Kleij<sup>3,4\*</sup>, Genping Huang<sup>1\*</sup>

<sup>1</sup> Department of Chemistry, School of Science and Tianjin Key Laboratory of Molecular Optoelectronic Sciences, Tianjin University, Tianjin 300072, P. R. China.

<sup>2</sup> College of Chemistry and Molecular Engineering, Peking University, Beijing 100871, P. R. China.

<sup>3</sup> Institute of Chemical Research of Catalonia (ICIQ), the Barcelona Institute of Science and Technology, 43007 Tarragona, Spain.

<sup>4</sup> Catalan Institute of Research and Advanced Studies (ICREA), Pg. Lluís Companys 23, 08010 Barcelona, Spain

\*Corresponding authors: [gphuang@tju.edu.cn](mailto:gphuang@tju.edu.cn), [akleij@iciq.es](mailto:akleij@iciq.es)

## Table of Contents:

|           |                                                                                                                 |
|-----------|-----------------------------------------------------------------------------------------------------------------|
| Page S3:  | The formation of species <b>IM1a</b> and <b>IM1b</b> from ( <i>rac</i> )- <b>A</b> and PdL                      |
| Page S4:  | C-O oxidative addition/CO <sub>2</sub> extrusion of <b>IM1a-endo</b> , <b>IM1b-exo</b> and <b>IM1b-endo</b>     |
| Page S5:  | C-O oxidative addition via the S <sub>N</sub> 2 back-side attack transition states without the Pd-S interaction |
| Page S6:  | C-O oxidative addition via S <sub>N</sub> 2 front-side attack transition states with the Pd-O interaction       |
| Page S7:  | C-O oxidative addition in the absence of sodium benzyldisulfinate                                               |
| Page S8:  | The isomerization of <b>IM2a-exo</b> to <b>IM2a'-exo</b>                                                        |
| Page S9:  | CO <sub>2</sub> extrusion without sodium benzyldisulfinate                                                      |
| Page S10: | The CO <sub>2</sub> extrusion process leading to <b>IM3a'-exo</b> and <b>IM3b'-endo</b>                         |
| Page S11: | C-S bond formation via outer-sphere nucleophilic attack of <b>IM3a'-endo</b> and <b>IM3b'-exo</b>               |
| Page S12: | C-S bond formation via outer-sphere nucleophilic attack of <b>IM3a-endo</b> and <b>IM3b-exo</b>                 |
| Page S13: | C-S bond formation via outer-sphere nucleophilic attack of <b>IM3a-exo</b> and <b>IM3b-endo</b>                 |
| Page S14: | The tetramer form of NaO <sup>t</sup> Bu                                                                        |
| Page S15: | The isomerization of <b>IM3a-exo</b> and <b>IM3b-endo</b> to <b>IM6a-exo</b> and <b>IM6b-endo</b>               |
| Page S16: | The isomerization of <b>IM6a-exo</b> and <b>IM6b-endo</b> to <b>IM6a'-exo</b> and <b>IM6b'-endo</b>             |
| Page S17: | $\pi$ - $\sigma$ - $\pi$ isomerization                                                                          |
| Page S18: | C-S bond formation via inner-sphere nucleophilic attack of <b>IM6a'-endo</b> and <b>IM6b'-exo</b>               |
| Page S19: | C-S bond formation via outer-sphere nucleophilic attack of <b>IM2a-exo</b> and <b>IM2b-endo</b>                 |
| Page S20: | C-S bond formation via inner-sphere nucleophilic attack of <b>IM2a-exo</b> and <b>IM2b-endo</b>                 |
| Page S21: | Inner sphere C-O reductive elimination                                                                          |
| Page S22: | The isomerization of <b>IM6a'-exo</b> and <b>IM6b'-endo</b> to pre-complexes                                    |
| Page S23: | The optimized geometries of <b>IM6a'-exo</b> and <b>IM6b'-endo</b>                                              |
| Page S24: | Overall catalytic cycle                                                                                         |
| Page S25: | The interacting energy of ligand fragment and substrate fragment                                                |
| Page S26: | Table of calculated energies and energy corrections                                                             |
| Page S28: | Cartesian coordinates                                                                                           |

The formation of species IM1a and IM1b from (*rac*)-A and PdL

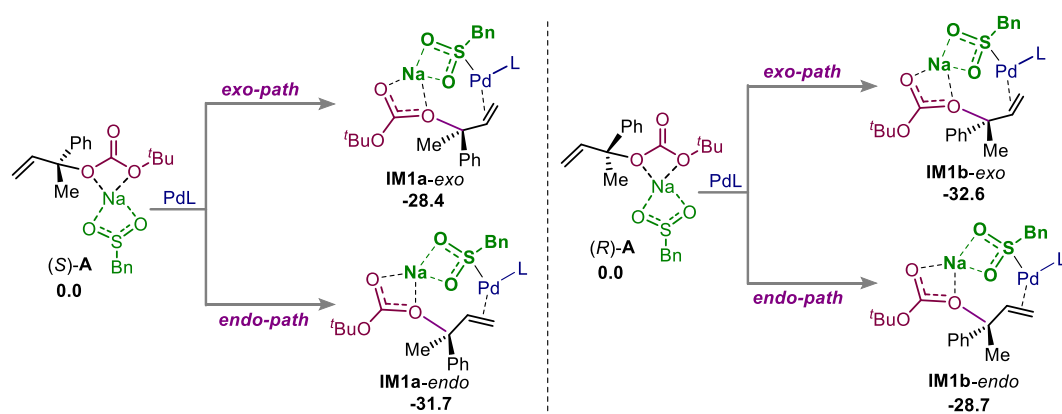

Scheme S1. The formation of species IM1a-*endo/exo* and IM1b-*endo/exo*. Gibbs free energies are given in kcal/mol.

**C-O oxidative addition/CO<sub>2</sub> extrusion of IM1a-endo, IM1b-exo and IM1b-endo.**

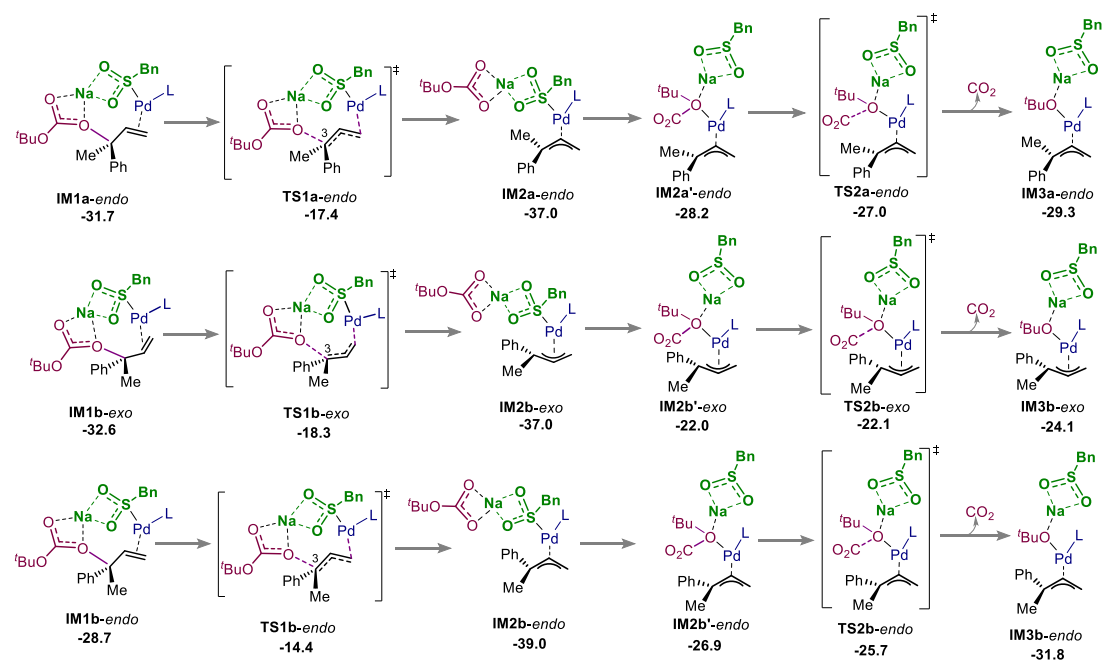

**Scheme S2.** C-O oxidative addition/CO<sub>2</sub> extrusion of IM1a-endo, IM1b-exo and IM1b-endo. Gibbs free energies are given in kcal/mol.

**C–O oxidative addition via the S<sub>N</sub>2 back-side attack transition states without the Pd-S interaction**

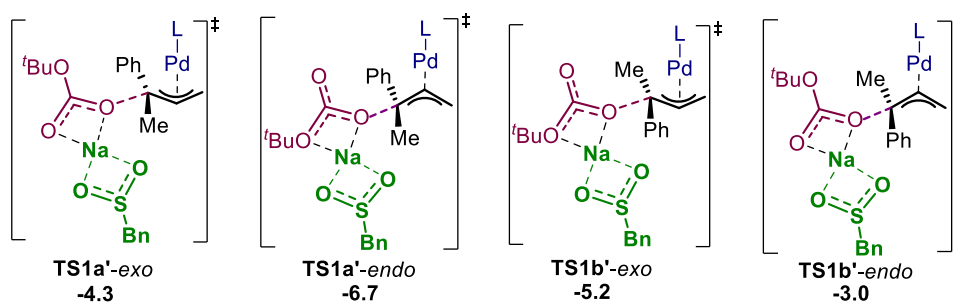

**Scheme S3.** S<sub>N</sub>2 back-side attack transition states without the Pd-S interaction. Gibbs free energies are given in kcal/mol.

**C–O oxidative addition via  $S_N2$  front-side attack transition states with the Pd-O interaction**

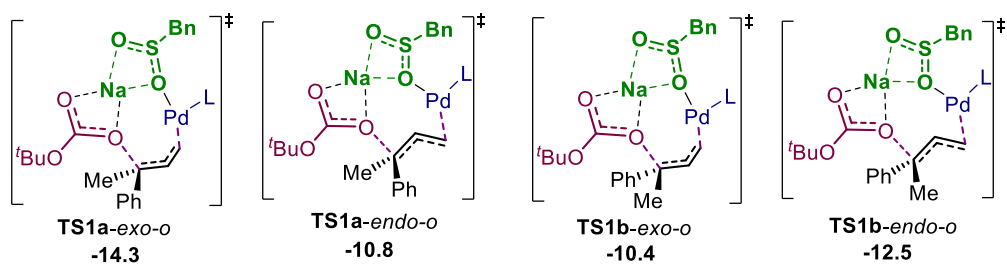

**Scheme S4.**  $S_N2$  front-side attack transition states with the Pd-O interaction. Gibbs free energies are given in kcal/mol.

## C–O oxidative addition in the absence of sodium benzenesulfonate

$S_N2$  back-side attack transition states

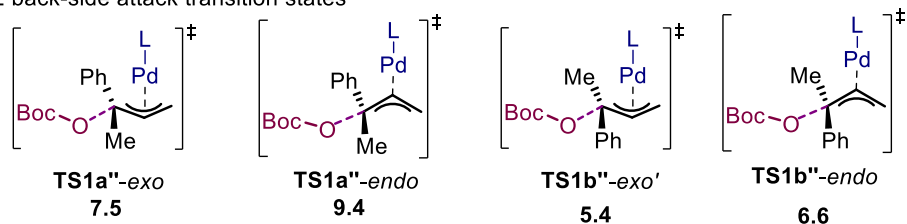

Front-side attack transition states

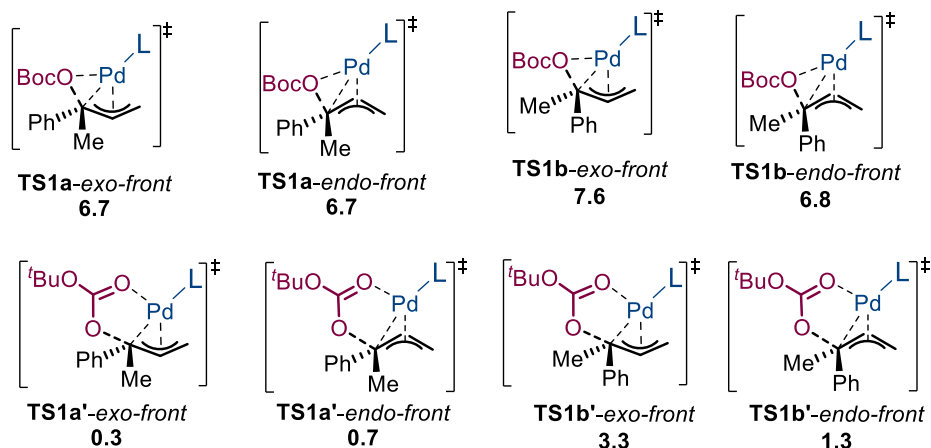

**Scheme S5.**  $S_N2$  back-side and front-side attack transition states in the absence of sodium benzenesulfonate. Gibbs free energies are given in kcal/mol.

### The isomerization of IM2a-*exo* to IM2a'-*exo*

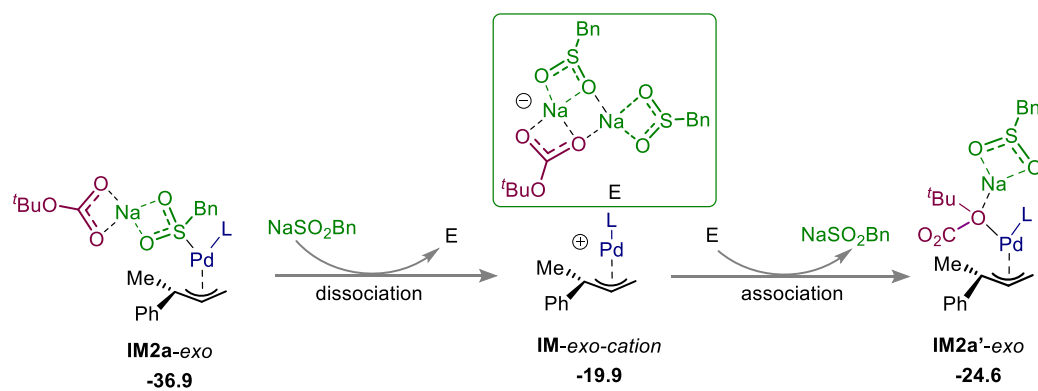

**Scheme S6.** The dissociation and association processes between **IM2a-*exo*** and **IM2a'-*exo***. Gibbs free energies are given in kcal/mol.



### CO<sub>2</sub> extrusion without sodium benzyldisulfinate

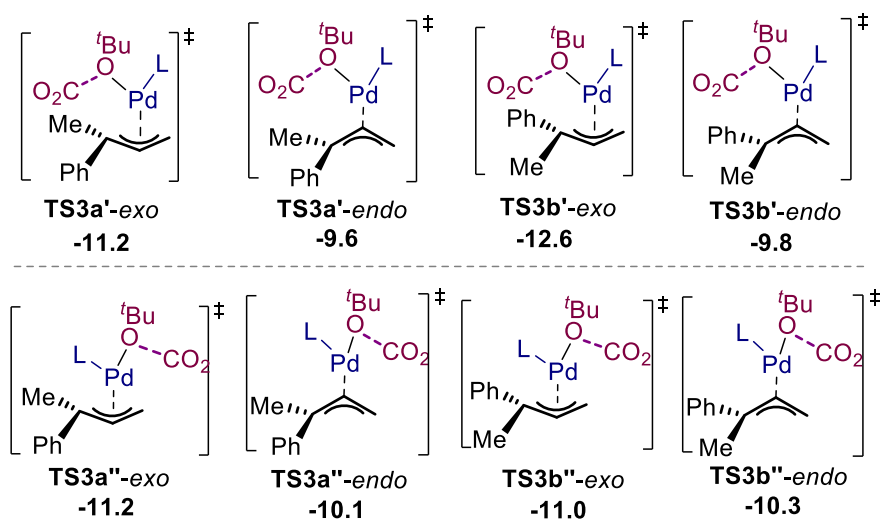

**Scheme S7.** CO<sub>2</sub> extrusion without sodium benzyldisulfinate. Gibbs free energies are given in kcal/mol.

The CO<sub>2</sub> extrusion process leading to **IM3a'**-*exo* and **IM3b'**-*endo*.

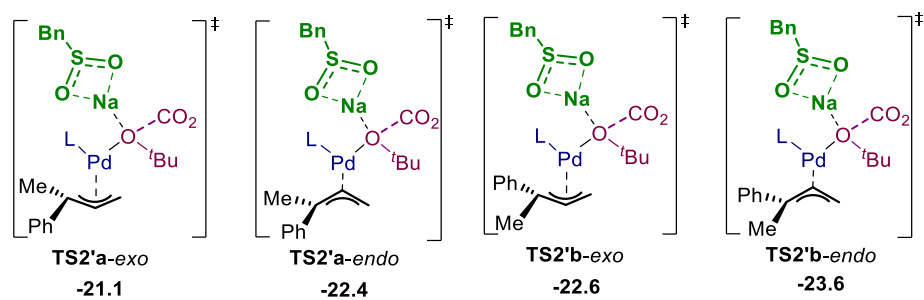

**Scheme S8.** The CO<sub>2</sub> extrusion process leading to **IM3a'**-*exo* and **IM3b'**-*endo*. Gibbs free energies are given in kcal/mol.

**C-S bond formation via outer-sphere nucleophilic attack of IM3a'-endo and IM3b'-exo**

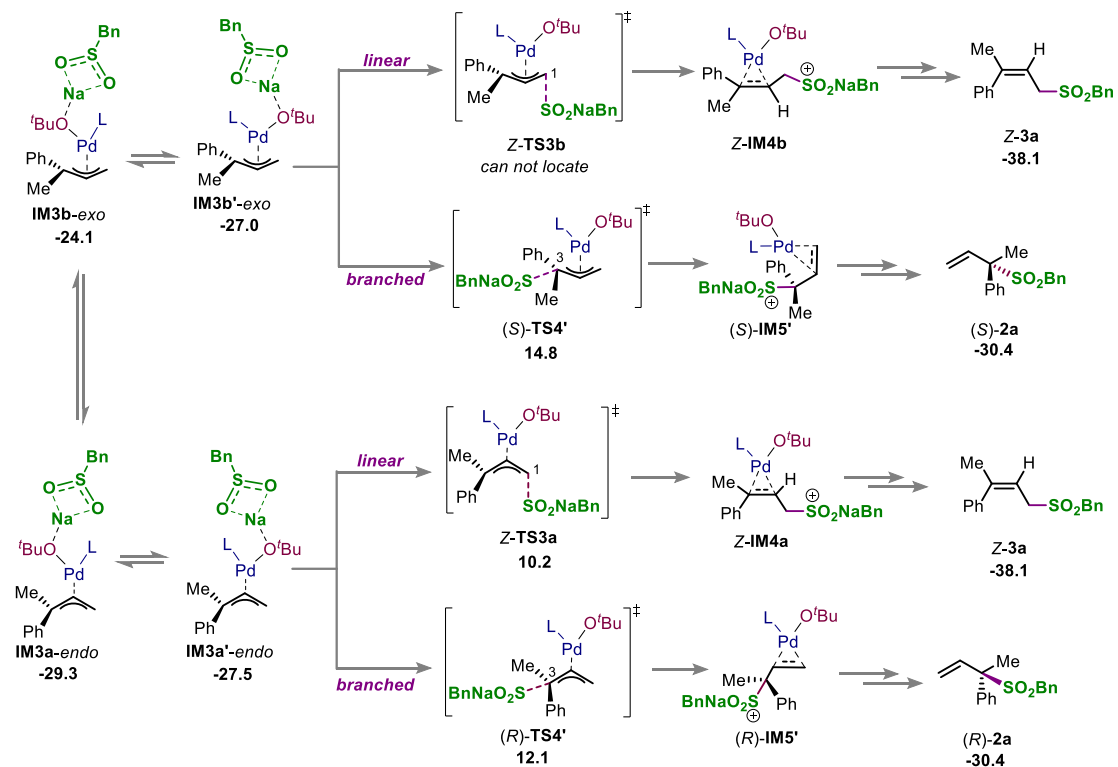

**Scheme S9.** Outer-sphere nucleophilic attack of **IM3a'-endo** and **IM3b'-exo**. Gibbs free energies are given in kcal/mol.

C-S bond formation via outer-sphere nucleophilic attack of **IM3a-endo** and **IM3b-exo**

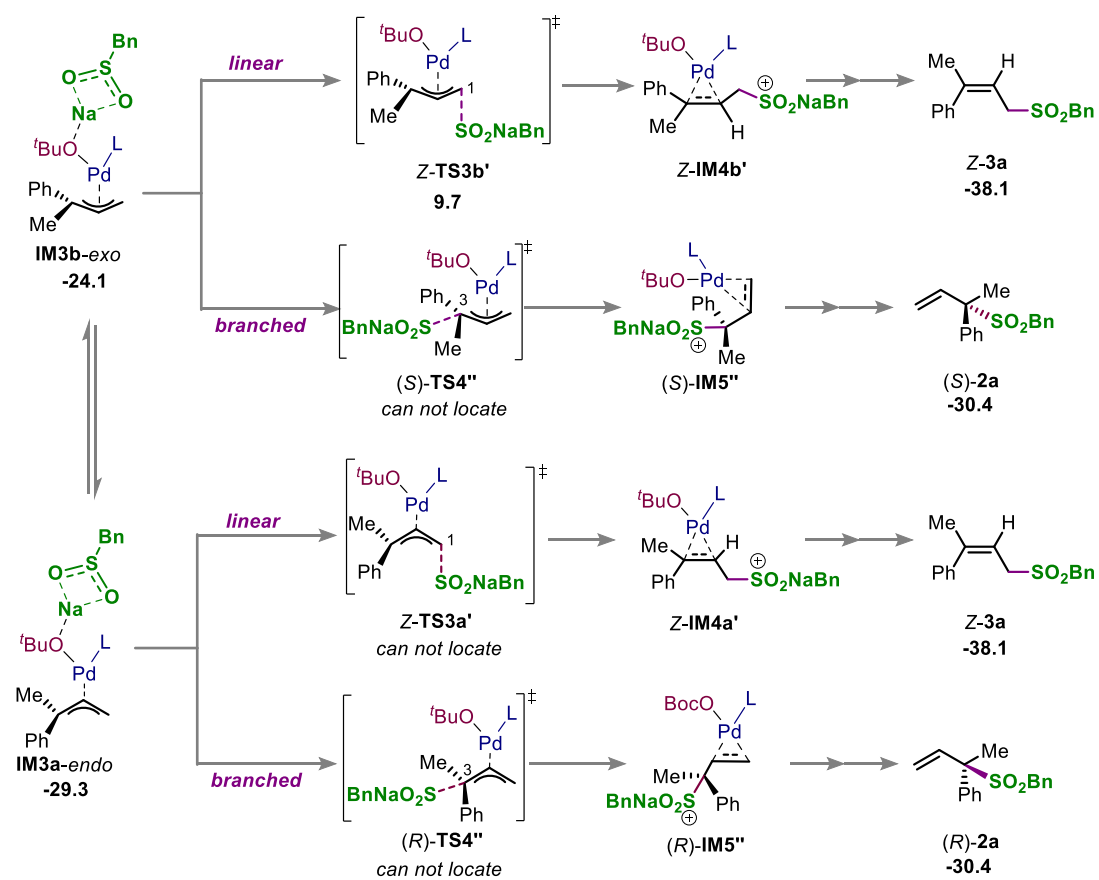

**Scheme S10.** outer-sphere nucleophilic attack of **IM3a-endo** and **IM3b-exo**. Gibbs free energies are given in kcal/mol.

C-S bond formation via outer-sphere nucleophilic attack of IM3a-*exo* and IM3b-*endo*

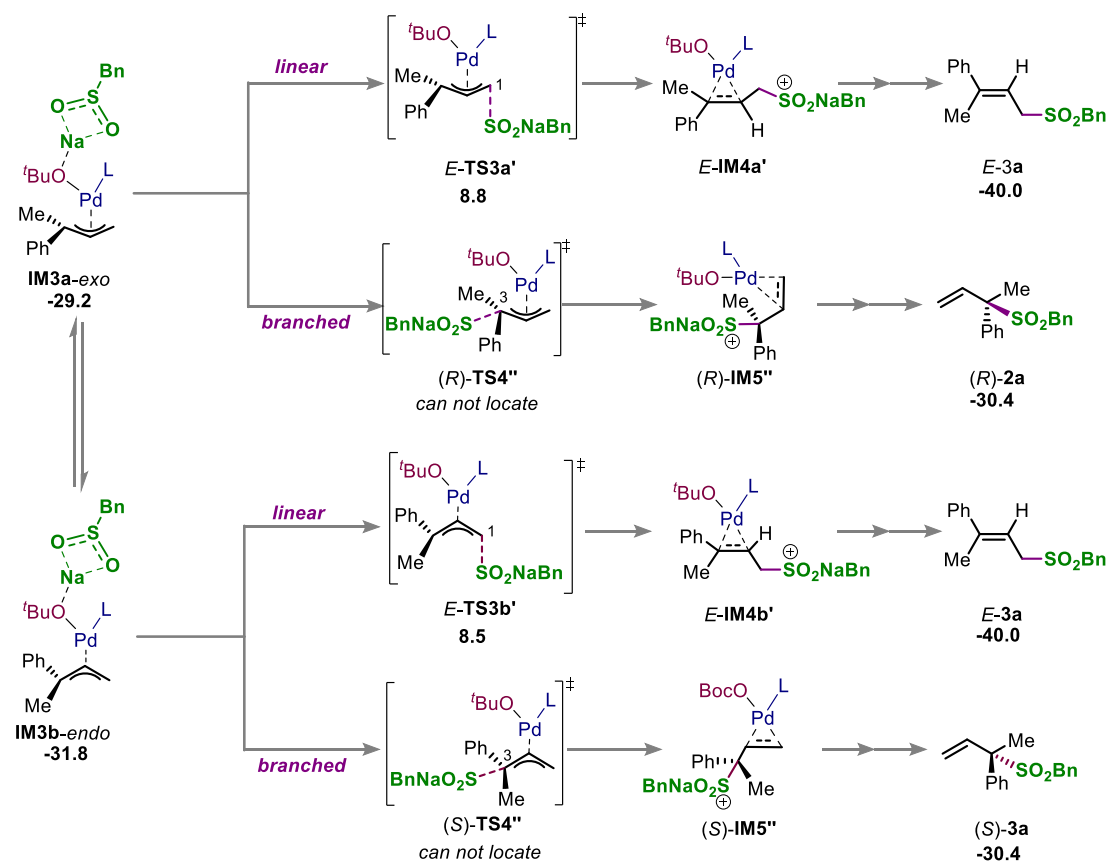

**Scheme S11.** outer-sphere nucleophilic attack of **IM3a-*exo*** and **IM3b-*endo***. Gibbs free energies are given in kcal/mol.

**The tetramer form of NaOtBu**

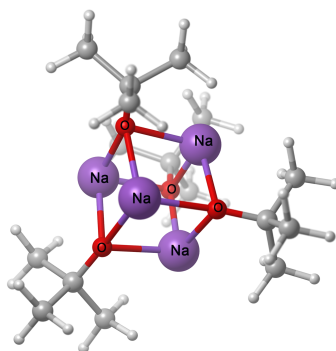

**Scheme S12.** The tetramer form of NaOtBu.

### The isomerization of IM3a-*exo* and IM3b-*endo* to IM6a-*exo* and IM6b-*endo*

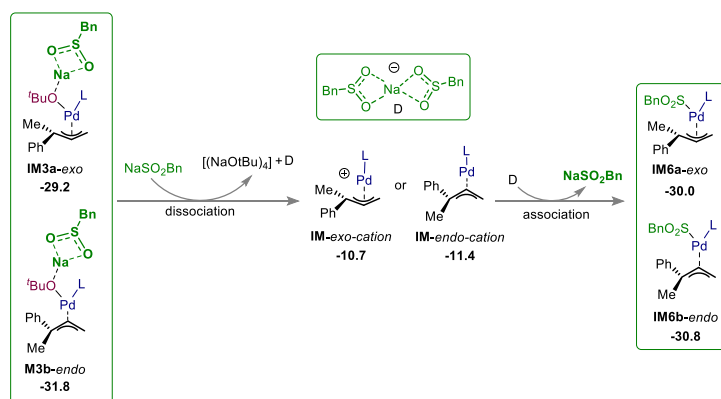

**Scheme S13.** The isomerization for the rearrangement of **IM3a** to **IM6a**. Gibbs free energies are given in kcal/mol.

The isomerization of **IM6a-exo** and **IM6b-endo** to **IM6a'-exo** and **IM6b'-endo**

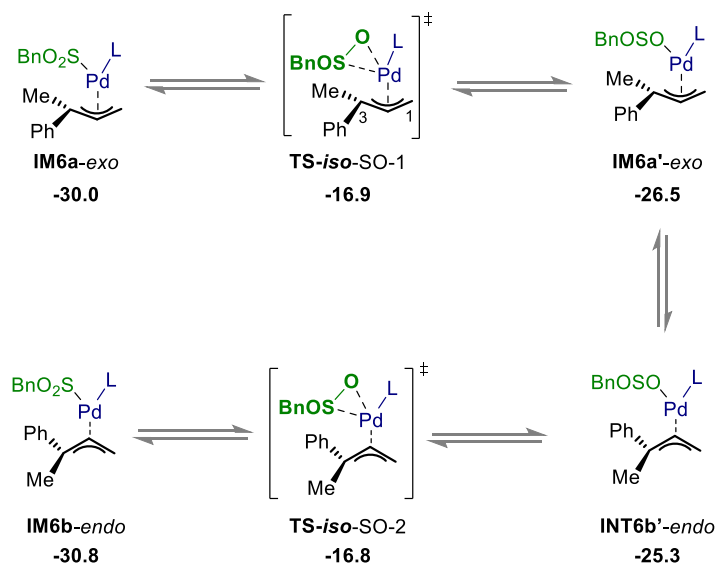

**Scheme S14.** The isomerization for the rearrangement of **IM6a** to **IM6a'**. Gibbs free energies are given in kcal/mol.



### $\pi$ - $\sigma$ - $\pi$ isomerization

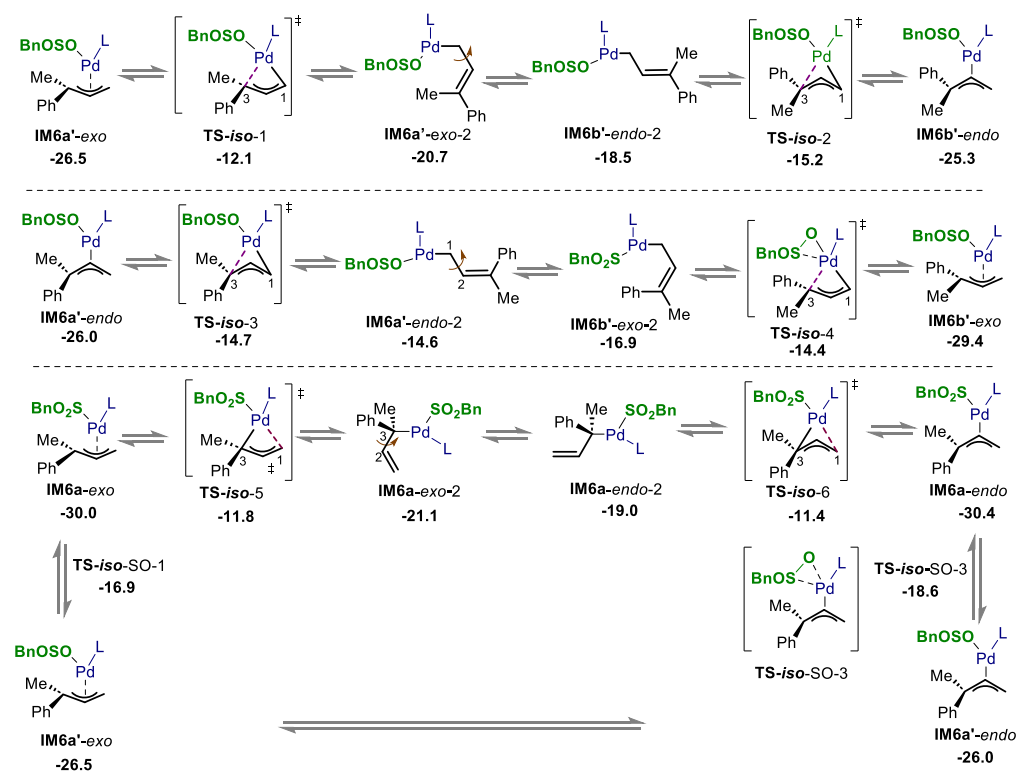

**Scheme S15.** The interconversion between **IM6a'-exo** and **IM6b'-endo**, **IM6a'-endo** and **IM6b'-exo**. Gibbs free energies are given in kcal/mol.

C-S bond formation via inner-sphere nucleophilic attack of **IM6a'**-endo and **IM6b'**-exo

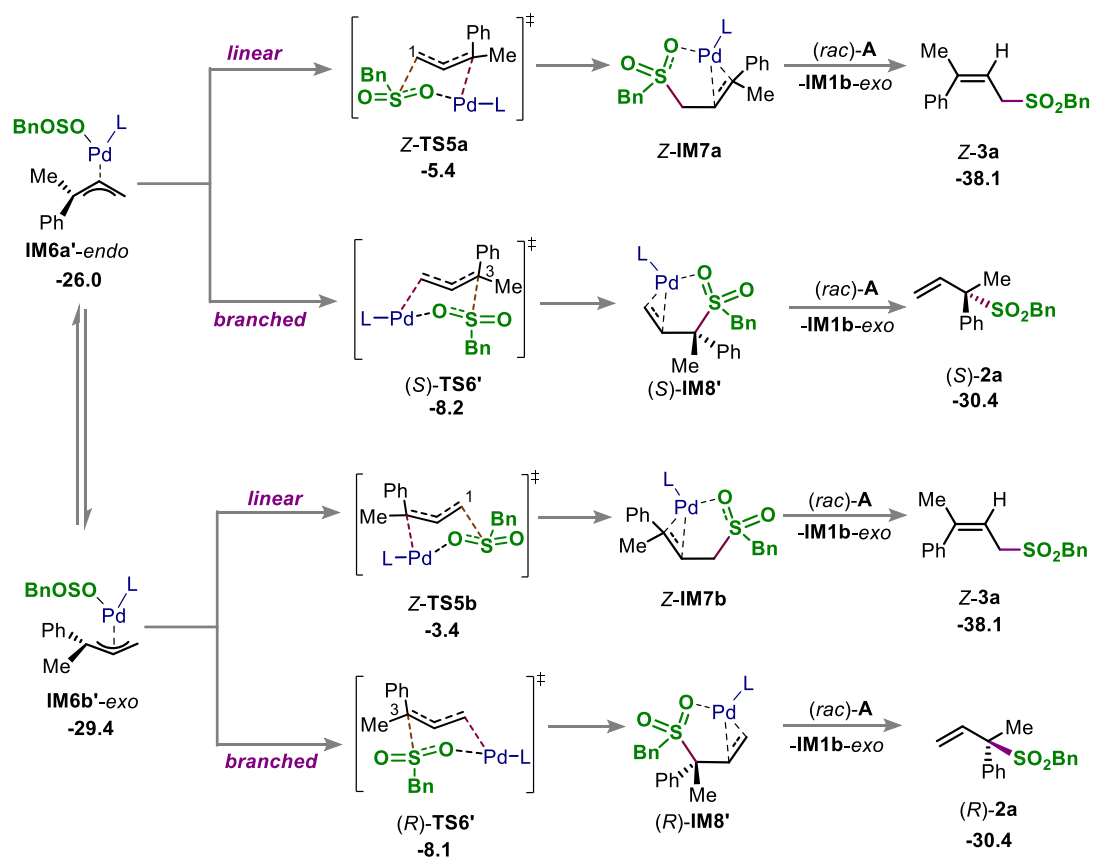

**Scheme S16.** inner-sphere nucleophilic attack of **IM6a'**-endo and **IM6b'**-exo. Gibbs free energies are given in kcal/mol.

C-S bond formation via outer-sphere nucleophilic attack of **IM2a-*exo*** and **IM2b-*endo***

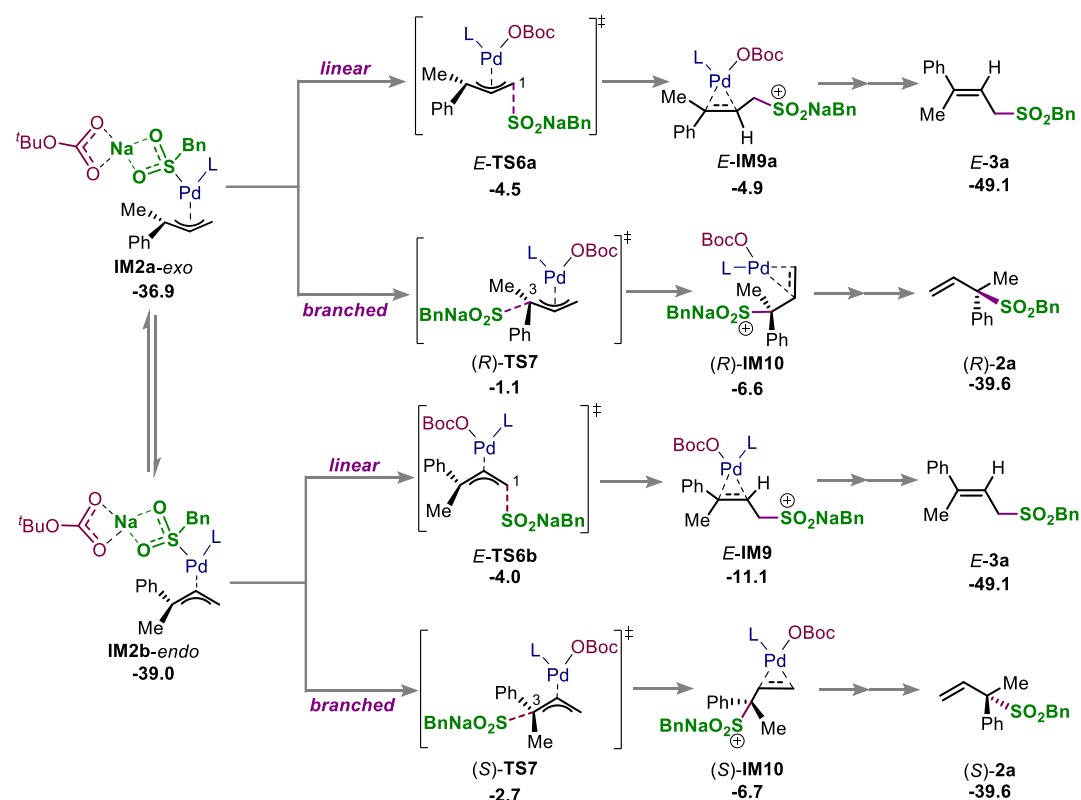

**Scheme S17.** outer-sphere nucleophilic attack of **IM2a-*exo*** and **IM2b-*endo***. Gibbs free energies are given in kcal/mol.

### C-S bond formation via inner-sphere nucleophilic attack of **IM2a-exo** and **IM2b-endo**

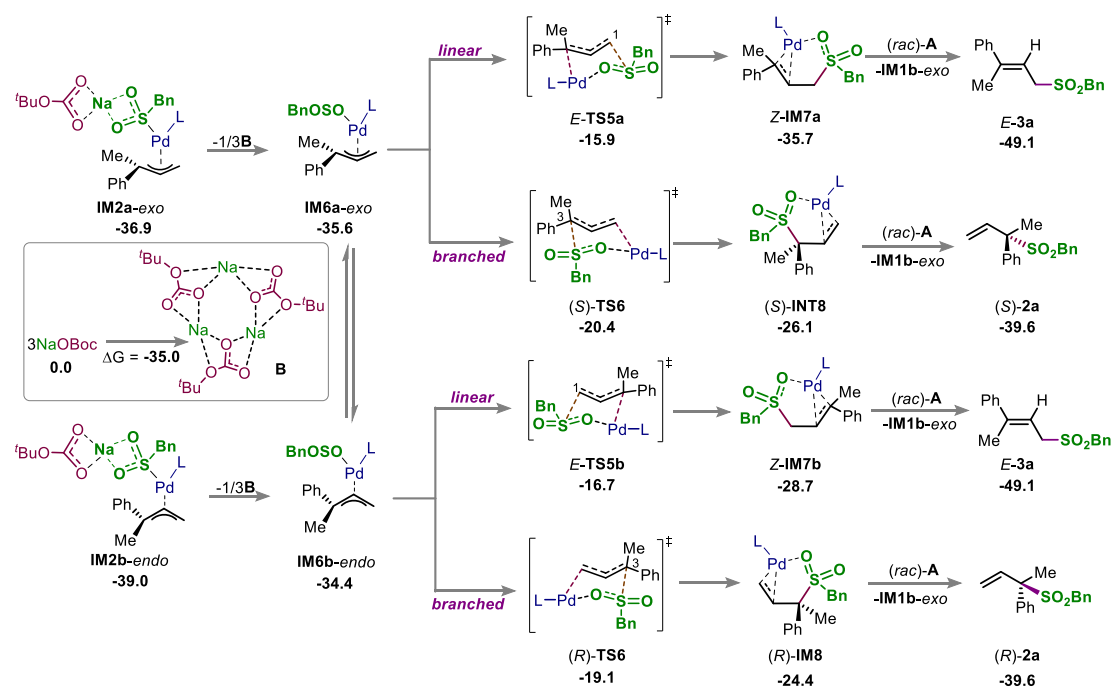

**Scheme S18.** inner-sphere nucleophilic attack of **IM2a-exo** and **IM2b-endo**. Gibbs free energies are given in kcal/mol.

## Inner sphere C-O reductive elimination

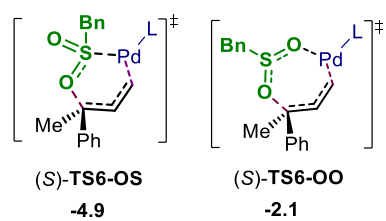

**Scheme S19.** Inner sphere C-O reductive elimination. Gibbs free energies are given in kcal/mol.

## The isomerization of **IM6a'**-*exo* and **IM6b'**-*endo* to pre-complexes

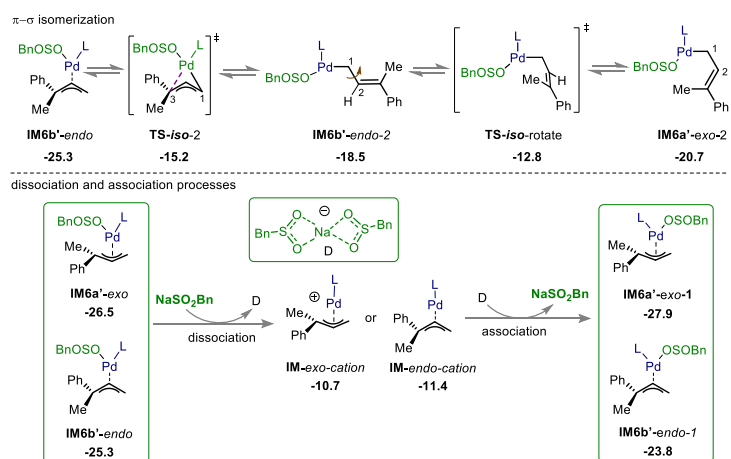

**Scheme S20.** The isomerization of **IM6a'**-*exo* and **IM6b'**-*endo* to **IM6a'**-*exo-1*, **IM6b'**-*endo-1*, **IM6a'**-*exo-2* and **IM6b'**-*endo-2*. Gibbs free energies are given in kcal/mol.

The optimized geometries of IM6a'-*exo* and IM6b'-*endo*

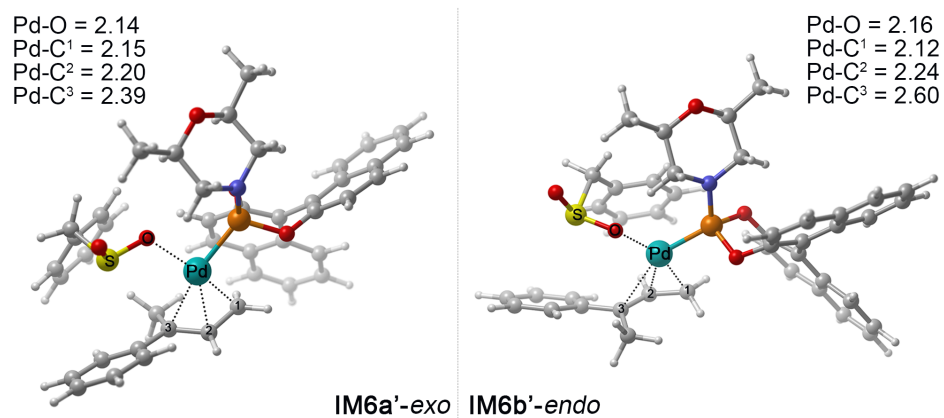

**Figure S1.** The optimized geometries of IM6a'-*exo* and IM6b'-*endo*. Selected bond distances are given in Å.

## Overall catalytic cycle

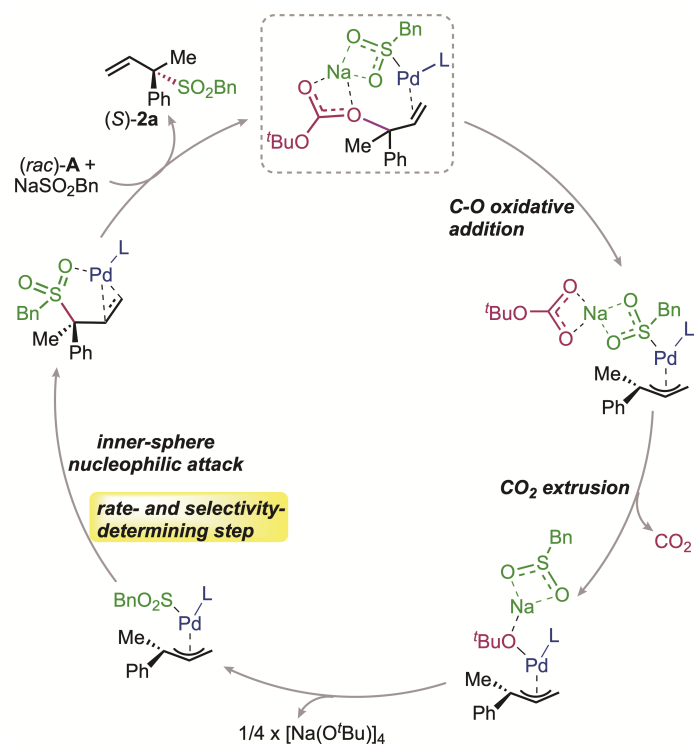

Scheme S21. Overall catalytic cycle based on DFT Calculations



## The interacting energy of ligand fragment and substrate fragment

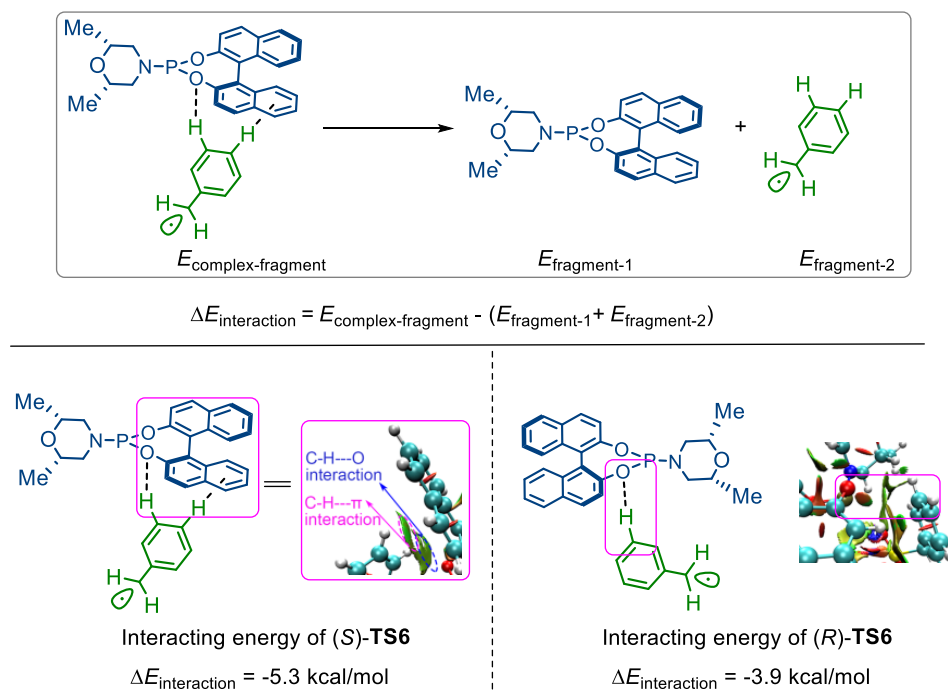

**Scheme S22.** The interacting energy between the phosphoramidite ligand fragment and benzyl radical of benzylsulfinate.

Table of calculated energies and energy corrections

| Stationary point                      | Single-point energy<br>PBE0-D3(BJ)-SMD<br>6-311+G(d,p), LANL2TZf<br>(a.u.) | Thermal correction to<br>Gibbs free energy at<br>298.15 K<br>(a.u.) |
|---------------------------------------|----------------------------------------------------------------------------|---------------------------------------------------------------------|
| PdL                                   | -1752.61837                                                                | 0.374533                                                            |
| CO <sub>2</sub>                       | -188.4434532                                                               | -0.009504                                                           |
| [(NaO <sup>t</sup> Bu) <sub>4</sub> ] | -1580.567838                                                               | 0.424291                                                            |
| ( <i>R</i> )-A                        | -1790.012535                                                               | 0.369107                                                            |
| ( <i>S</i> )-A                        | -1790.012535                                                               | 0.369107                                                            |
| ( <i>S</i> )-2a                       | -1206.404181                                                               | 0.253013                                                            |
| ( <i>R</i> )-2a                       | -1206.404181                                                               | 0.253013                                                            |
| <i>E</i> -3a                          | -1206.420577                                                               | 0.254186                                                            |
| IM1a- <i>exo</i>                      | -3542.711061                                                               | 0.778532                                                            |
| IM1a- <i>endo</i>                     | -3542.715406                                                               | 0.777652                                                            |
| IM1b- <i>exo</i>                      | -3542.717693                                                               | 0.778515                                                            |
| IM1b- <i>endo</i>                     | -3542.708357                                                               | 0.775403                                                            |
| TS1a- <i>exo</i>                      | -3542.689978                                                               | 0.774942                                                            |
| IM2a- <i>exo</i>                      | -3542.726565                                                               | 0.780491                                                            |
| IM2a'- <i>exo</i>                     | -3542.708335                                                               | 0.781837                                                            |
| TS2a- <i>exo</i>                      | -3542.704897                                                               | 0.77773                                                             |
| IM3a- <i>exo</i>                      | -3354.251929                                                               | 0.771145                                                            |
| IM3a- <i>endo</i>                     | -3354.251314                                                               | 0.770335                                                            |
| IM3b- <i>endo</i>                     | -3354.25311                                                                | 0.768195                                                            |
| IM3b- <i>exo</i>                      | -3354.2474713                                                              | 0.774801                                                            |
| IM3a'- <i>exo</i>                     | -3354.25395                                                                | 0.772853                                                            |
| IM3b'- <i>endo</i>                    | -3354.254213                                                               | 0.772734                                                            |
| <i>E</i> -TS3a                        | -3354.187068                                                               | 0.76519                                                             |
| ( <i>R</i> )-TS4                      | -3354.185138                                                               | 0.767521                                                            |
| <i>E</i> -TS3b                        | -3354.186966                                                               | 0.76437                                                             |
| ( <i>S</i> )-TS4                      | -3354.189316                                                               | 0.765778                                                            |
| <i>E</i> -IM4a                        | -3354.199694                                                               | 0.769187                                                            |
| ( <i>R</i> )-IM5                      | -3354.194598                                                               | 0.766203                                                            |
| <i>E</i> -IM4b                        | -3354.196868                                                               | 0.767114                                                            |
| ( <i>S</i> )-IM5                      | -3354.192829                                                               | 0.766525                                                            |
| IM6a- <i>exo</i>                      | -2959.102096                                                               | 0.655903                                                            |

|                      |              |          |
|----------------------|--------------|----------|
| <b>IM6b-endo</b>     | -2959.102694 | 0.655124 |
| <b>IM6a'-exo</b>     | -2959.094553 | 0.653919 |
| <b>IM6b'-endo</b>    | -2959.091731 | 0.653064 |
| <b>IM6a'-exo-1</b>   | -2959.097848 | 0.655022 |
| <b>IM6a'-exo-2</b>   | -2959.08612  | 0.654732 |
| <b>IM6b'-endo-1</b>  | -2959.093525 | 0.657232 |
| <b>IM6b'-endo-2</b>  | -2959.084200 | 0.656221 |
| <b>E-TS5a</b>        | -2959.064086 | 0.654878 |
| <b>(S)-TS6</b>       | -2959.067502 | 0.651196 |
| <b>E-TS5b</b>        | -2959.065312 | 0.654799 |
| <b>(R)-TS6</b>       | -2959.067673 | 0.653401 |
| <b>E-IM7a</b>        | -2959.099666 | 0.65892  |
| <b>(S)-IM8</b>       | -2959.083038 | 0.657529 |
| <b>E-IM7b</b>        | -2959.088716 | 0.659167 |
| <b>(R)-IM8</b>       | -2959.080448 | 0.657704 |
| <b>TS-iso-1</b>      | -2959.071871 | 0.654176 |
| <b>TS-iso-2</b>      | -2959.07648  | 0.65388  |
| <b>TS-iso-rotate</b> | -2959.07208  | 0.653339 |
| <b>TS-iso-3</b>      | -2959.07361  | 0.651698 |
| <b>TS-iso-4</b>      | -2959.074862 | 0.653456 |
| <b>TS-iso-5</b>      | -2959.072358 | 0.655151 |
| <b>TS-iso-6</b>      | -2959.072792 | 0.65615  |
| <b>TS-iso-SO-1</b>   | -2959.078015 | 0.652583 |
| <b>TS-iso-SO-2</b>   | -2959.076853 | 0.651636 |
| <b>TS-iso-SO-3</b>   | -2959.078733 | 0.650711 |

## Cartesian coordinates

| PdL |             |             |             |
|-----|-------------|-------------|-------------|
| Pd  | 0.74453400  | -0.49993400 | 0.14428400  |
| P   | -1.12243400 | 0.42938700  | 0.54297400  |
| O   | -2.33656800 | 0.37078100  | -0.65088300 |
| O   | -1.00334100 | 2.13816900  | 0.67979300  |
| C   | -2.30738900 | 2.47714400  | -1.81730800 |
| C   | -2.07334300 | 1.09921800  | -1.80394400 |
| C   | -1.59972600 | 0.39099900  | -2.93826700 |
| C   | -1.35526700 | 1.07372300  | -4.11633700 |
| C   | -1.23723000 | 3.20620600  | -5.38357600 |
| C   | -1.35972900 | 4.58584600  | -5.43481400 |
| C   | -1.77307300 | 5.30174900  | -4.27771700 |
| C   | -2.07996500 | 4.63197600  | -3.10224100 |
| C   | -1.99349200 | 3.20852400  | -3.01996000 |
| C   | -1.53274600 | 2.48698600  | -4.18693900 |
| C   | -2.81535900 | 3.13440300  | -0.58116400 |
| C   | -2.13127000 | 2.94403800  | 0.62582300  |
| C   | -2.52050000 | 3.59412800  | 1.82732400  |
| C   | -3.63022100 | 4.41755400  | 1.83743300  |
| C   | -5.59979600 | 5.38729300  | 0.67535600  |
| C   | -6.38752000 | 5.51486200  | -0.45825700 |
| C   | -6.02006700 | 4.83654200  | -1.65269400 |
| C   | -4.86757100 | 4.06561700  | -1.70431100 |
| C   | -4.01823400 | 3.93053600  | -0.56372900 |
| C   | -4.41578500 | 4.59161300  | 0.65997400  |
| H   | -1.44887100 | -0.68573100 | -2.85424800 |
| H   | -1.00467000 | 0.54154000  | -5.00334900 |
| H   | -0.90073200 | 2.64274000  | -6.25723000 |
| H   | -1.12703600 | 5.12571400  | -6.35496700 |
| H   | -1.84422900 | 6.39092100  | -4.31190600 |
| H   | -2.38662100 | 5.19538600  | -2.22245500 |
| H   | -1.92621400 | 3.42465100  | 2.72589900  |
| H   | -3.93356400 | 4.92843300  | 2.75397600  |
| H   | -5.87687700 | 5.88624800  | 1.60725300  |
| H   | -7.29383700 | 6.12328400  | -0.43400800 |
| H   | -6.65376600 | 4.91830100  | -2.53831100 |
| H   | -4.60425400 | 3.54625900  | -2.62451000 |
| C   | -1.49935400 | -0.98837500 | 2.85722200  |
| C   | -3.44531900 | 0.30807800  | 2.11447700  |
| C   | -2.42612000 | -2.19789600 | 3.07064800  |
| H   | -1.40645400 | -0.43301400 | 3.80987000  |
| H   | -0.49990900 | -1.32776100 | 2.53942000  |

|                                       |             |             |            |
|---------------------------------------|-------------|-------------|------------|
| C                                     | -4.32208600 | -0.93421700 | 2.35501200 |
| H                                     | -3.45380600 | 0.93884000  | 3.02188300 |
| H                                     | -3.84405700 | 0.88755600  | 1.27469400 |
| H                                     | -2.45938900 | -2.76997700 | 2.12083900 |
| H                                     | -4.34997000 | -1.51785000 | 1.41290300 |
| N                                     | -2.06297200 | -0.11152700 | 1.82186500 |
| O                                     | -3.75736600 | -1.75439300 | 3.39444300 |
| C                                     | -5.73272100 | -0.54810400 | 2.78830000 |
| H                                     | -6.21694400 | 0.05305200  | 2.00237300 |
| H                                     | -6.33831000 | -1.44980800 | 2.96872600 |
| H                                     | -5.69834900 | 0.04494700  | 3.71658400 |
| C                                     | -1.94699000 | -3.08425700 | 4.21539500 |
| H                                     | -2.64361700 | -3.92354600 | 4.36546100 |
| H                                     | -0.94820500 | -3.48944500 | 3.98721900 |
| H                                     | -1.88874000 | -2.50358300 | 5.15028800 |
| CO <sub>2</sub>                       |             |             |            |
| C                                     | -0.83769600 | 0.56282700  | 0.00000000 |
| O                                     | 0.33990400  | 0.56282700  | 0.00000000 |
| O                                     | -2.01529700 | 0.56282700  | 0.00000000 |
| [(NaO <sup>t</sup> Bu) <sub>4</sub> ] |             |             |            |
| O                                     | 3.39251300  | 2.27845900  | 4.45995000 |
| C                                     | 2.98319900  | 3.53020800  | 4.89775400 |
| C                                     | 1.43624300  | 3.62856400  | 4.89807600 |
| C                                     | 3.50371600  | 3.79802500  | 6.34140200 |
| C                                     | 3.55321100  | 4.64608800  | 3.97114600 |
| H                                     | 1.05756900  | 3.45291800  | 3.87604400 |
| H                                     | 1.01907400  | 2.84855500  | 5.55843600 |
| H                                     | 1.07213200  | 4.61290900  | 5.24285600 |
| H                                     | 4.61070000  | 3.81870800  | 6.34780400 |
| H                                     | 3.15806100  | 4.76309100  | 6.75111600 |
| H                                     | 3.15319900  | 2.99447000  | 7.01551700 |
| H                                     | 3.19255400  | 5.65356600  | 4.24192200 |
| H                                     | 4.65808900  | 4.66931200  | 4.03436900 |
| H                                     | 3.25661000  | 4.44485300  | 2.92525600 |
| Na                                    | 3.38540900  | 0.19808100  | 3.72402700 |
| O                                     | 6.76893100  | 2.00322700  | 4.52095800 |
| C                                     | 8.00169300  | 2.43822100  | 4.05545100 |
| C                                     | 8.85495800  | 1.23240000  | 3.55757200 |
| C                                     | 7.81580800  | 3.41295800  | 2.85436500 |
| C                                     | 8.78267800  | 3.17002800  | 5.17625600 |
| H                                     | 8.93617600  | 0.48018300  | 4.36373800 |
| H                                     | 8.37925700  | 0.76498200  | 2.67315700 |

|           |             |             |             |
|-----------|-------------|-------------|-------------|
| H         | 9.87570300  | 1.52487800  | 3.25578500  |
| H         | 7.17699700  | 4.26207000  | 3.15974000  |
| H         | 8.77100400  | 3.82168700  | 2.48134900  |
| H         | 7.33356700  | 2.88413400  | 2.00994700  |
| H         | 9.76658100  | 3.53954700  | 4.83615000  |
| H         | 8.18976300  | 4.02904200  | 5.53542400  |
| H         | 8.94012500  | 2.48152100  | 6.02460400  |
| Na        | 5.05990700  | 1.49286600  | 5.83961200  |
| O         | 4.83351900  | -0.63980200 | 5.29872300  |
| C         | 4.69416100  | -2.01956300 | 5.34663500  |
| C         | 4.69679800  | -2.51841300 | 6.81404100  |
| C         | 3.35985600  | -2.45781100 | 4.67097000  |
| C         | 5.86201800  | -2.71227300 | 4.58145800  |
| H         | 5.64358200  | -2.22449600 | 7.29964100  |
| H         | 3.86593500  | -2.04448700 | 7.36500300  |
| H         | 4.58820300  | -3.61520000 | 6.89011000  |
| H         | 3.37863700  | -2.20967800 | 3.59222100  |
| H         | 3.17587000  | -3.54346100 | 4.74925900  |
| H         | 2.51286200  | -1.93073400 | 5.14793300  |
| H         | 5.82580000  | -3.81356500 | 4.64780400  |
| H         | 5.82141400  | -2.44815200 | 3.50708000  |
| H         | 6.82871800  | -2.37606000 | 5.00051800  |
| Na        | 6.38364600  | -0.10653500 | 3.68937800  |
| O         | 4.97093800  | 0.43954200  | 2.07149200  |
| C         | 4.32947500  | 0.54157700  | 0.84442200  |
| C         | 5.04806900  | -0.32323700 | -0.22249600 |
| C         | 2.85082300  | 0.06493900  | 0.96141300  |
| C         | 4.31170900  | 2.02207800  | 0.35864300  |
| H         | 6.09635400  | 0.00895600  | -0.31961400 |
| H         | 5.05053100  | -1.37938700 | 0.09860900  |
| H         | 4.56650200  | -0.25971800 | -1.21467100 |
| H         | 2.28864700  | 0.73149700  | 1.64395300  |
| H         | 2.32087200  | 0.07121500  | -0.00682500 |
| H         | 2.82490400  | -0.96513000 | 1.36138100  |
| H         | 3.86452000  | 2.13949900  | -0.64370800 |
| H         | 3.71584800  | 2.64329100  | 1.05461700  |
| H         | 5.34471300  | 2.41397600  | 0.32038200  |
| Na        | 5.14303500  | 2.53783100  | 2.99835600  |
| <br>(R)-A |             |             |             |
| C         | -2.41334800 | -1.14430200 | 2.66267600  |
| H         | -1.80132700 | -1.95275700 | 2.23377100  |
| H         | -3.46281600 | -1.26248900 | 2.35181300  |
| C         | -2.25772200 | -1.01439000 | 4.13951000  |

|    |             |             |             |
|----|-------------|-------------|-------------|
| C  | -1.06366600 | -1.41545600 | 4.78042500  |
| C  | -3.26804900 | -0.40853300 | 4.92073600  |
| C  | -0.89102700 | -1.22981600 | 6.16013600  |
| H  | -0.27360300 | -1.88140300 | 4.18802700  |
| C  | -3.09675100 | -0.22027000 | 6.30073300  |
| H  | -4.19500100 | -0.08993900 | 4.43637700  |
| C  | -1.90696600 | -0.63145500 | 6.92698700  |
| H  | 0.03620900  | -1.55369000 | 6.63913900  |
| H  | -3.89226400 | 0.24479700  | 6.88792900  |
| H  | -1.77351700 | -0.48957900 | 8.00180000  |
| S  | -1.79285800 | 0.41982700  | 1.70601900  |
| O  | -1.92736700 | -0.08424800 | 0.23768600  |
| Na | 0.42455100  | -0.44399200 | 0.03788800  |
| O  | -0.28619200 | 0.46049700  | 2.09523700  |
| C  | 4.53481100  | -0.61050700 | -4.10997500 |
| C  | 3.81611900  | -0.44351200 | -2.99168000 |
| H  | 5.61969900  | -0.73078100 | -4.06208700 |
| H  | 4.07514100  | -0.63503300 | -5.10041600 |
| H  | 4.31265700  | -0.40953200 | -2.01735200 |
| C  | 2.31883900  | -0.23006200 | -2.93408400 |
| C  | 1.56939200  | -0.57226800 | -4.22869800 |
| H  | 0.48480600  | -0.50876000 | -4.06161500 |
| H  | 1.84385600  | 0.16264300  | -4.99944100 |
| H  | 1.83076500  | -1.57824300 | -4.57835300 |
| C  | 1.92957000  | 1.17363900  | -2.43415700 |
| C  | 0.59010500  | 1.41793600  | -2.05401600 |
| C  | 2.86135500  | 2.22194800  | -2.33790700 |
| C  | 0.20057500  | 2.66699400  | -1.55037000 |
| H  | -0.15890800 | 0.62862900  | -2.15140700 |
| C  | 2.46771200  | 3.48088300  | -1.85070000 |
| H  | 3.89535300  | 2.06007800  | -2.64429900 |
| C  | 1.14297700  | 3.70503200  | -1.44563900 |
| H  | -0.83505400 | 2.82295600  | -1.24379100 |
| H  | 3.20467300  | 4.28358800  | -1.78165500 |
| H  | 0.84430200  | 4.67978100  | -1.05541200 |
| O  | 1.79588200  | -1.07651300 | -1.80536800 |
| C  | 1.79914300  | -2.43796800 | -1.82980100 |
| O  | 2.28237300  | -3.16114400 | -2.67582700 |
| O  | 1.14626800  | -2.77627100 | -0.69276500 |
| C  | 0.89269700  | -4.20962300 | -0.31859500 |
| C  | 0.03000700  | -4.86976200 | -1.39809900 |
| C  | 2.23164600  | -4.92052300 | -0.10459400 |
| C  | 0.11911800  | -4.06410600 | 0.99466600  |
| H  | -0.88637800 | -4.28186700 | -1.56530200 |

|   |             |             |             |
|---|-------------|-------------|-------------|
| H | 0.57903100  | -4.96829400 | -2.34337600 |
| H | -0.25917500 | -5.87368400 | -1.05029600 |
| H | 2.83776200  | -4.37964100 | 0.63925800  |
| H | 2.03399900  | -5.93393300 | 0.27793900  |
| H | 2.79395000  | -5.00170000 | -1.04399900 |
| H | -0.11960400 | -5.06563800 | 1.38325900  |
| H | 0.72226200  | -3.53139900 | 1.74679400  |
| H | -0.82259600 | -3.51782500 | 0.83060000  |

(S)-A

|    |             |             |             |
|----|-------------|-------------|-------------|
| C  | -2.41334800 | -1.14430200 | -2.66267600 |
| H  | -1.80132700 | -1.95275700 | -2.23377100 |
| H  | -3.46281600 | -1.26248900 | -2.35181300 |
| C  | -2.25772200 | -1.01439000 | -4.13951000 |
| C  | -1.06366600 | -1.41545600 | -4.78042500 |
| C  | -3.26804900 | -0.40853300 | -4.92073600 |
| C  | -0.89102700 | -1.22981600 | -6.16013600 |
| H  | -0.27360300 | -1.88140300 | -4.18802700 |
| C  | -3.09675100 | -0.22027000 | -6.30073300 |
| H  | -4.19500100 | -0.08993900 | -4.43637700 |
| C  | -1.90696600 | -0.63145500 | -6.92698700 |
| H  | 0.03620900  | -1.55369000 | -6.63913900 |
| H  | -3.89226400 | 0.24479700  | -6.88792900 |
| H  | -1.77351700 | -0.48957900 | -8.00180000 |
| S  | -1.79285800 | 0.41982700  | -1.70601900 |
| O  | -1.92736700 | -0.08424800 | -0.23768600 |
| Na | 0.42455100  | -0.44399200 | -0.03788800 |
| O  | -0.28619200 | 0.46049700  | -2.09523700 |
| C  | 4.53481100  | -0.61050700 | 4.10997500  |
| C  | 3.81611900  | -0.44351200 | 2.99168000  |
| H  | 5.61969900  | -0.73078100 | 4.06208700  |
| H  | 4.07514100  | -0.63503300 | 5.10041600  |
| H  | 4.31265700  | -0.40953200 | 2.01735200  |
| C  | 2.31883900  | -0.23006200 | 2.93408400  |
| C  | 1.56939200  | -0.57226800 | 4.22869800  |
| H  | 0.48480600  | -0.50876000 | 4.06161500  |
| H  | 1.84385600  | 0.16264300  | 4.99944100  |
| H  | 1.83076500  | -1.57824300 | 4.57835300  |
| C  | 1.92957000  | 1.17363900  | 2.43415700  |
| C  | 0.59010500  | 1.41793600  | 2.05401600  |
| C  | 2.86135500  | 2.22194800  | 2.33790700  |
| C  | 0.20057500  | 2.66699400  | 1.55037000  |
| H  | -0.15890800 | 0.62862900  | 2.15140700  |
| C  | 2.46771200  | 3.48088300  | 1.85070000  |



|   |             |             |             |
|---|-------------|-------------|-------------|
| H | 3.89535300  | 2.06007800  | 2.64429900  |
| C | 1.14297700  | 3.70503200  | 1.44563900  |
| H | -0.83505400 | 2.82295600  | 1.24379100  |
| H | 3.20467300  | 4.28358800  | 1.78165500  |
| H | 0.84430200  | 4.67978100  | 1.05541200  |
| O | 1.79588200  | -1.07651300 | 1.80536800  |
| C | 1.79914300  | -2.43796800 | 1.82980100  |
| O | 2.28237300  | -3.16114400 | 2.67582700  |
| O | 1.14626800  | -2.77627100 | 0.69276500  |
| C | 0.89269700  | -4.20962300 | 0.31859500  |
| C | 0.03000700  | -4.86976200 | 1.39809900  |
| C | 2.23164600  | -4.92052300 | 0.10459400  |
| C | 0.11911800  | -4.06410600 | -0.99466600 |
| H | -0.88637800 | -4.28186700 | 1.56530200  |
| H | 0.57903100  | -4.96829400 | 2.34337600  |
| H | -0.25917500 | -5.87368400 | 1.05029600  |
| H | 2.83776200  | -4.37964100 | -0.63925800 |
| H | 2.03399900  | -5.93393300 | -0.27793900 |
| H | 2.79395000  | -5.00170000 | 1.04399900  |
| H | -0.11960400 | -5.06563800 | -1.38325900 |
| H | 0.72226200  | -3.53139900 | -1.74679400 |
| H | -0.82259600 | -3.51782500 | -0.83060000 |

**(R)-2a**

|   |             |             |              |
|---|-------------|-------------|--------------|
| C | 0.81845200  | -5.08461900 | -16.57841200 |
| C | 0.04739300  | -3.97022800 | -15.84832200 |
| H | 1.89365400  | -4.86932700 | -16.60631900 |
| H | 0.66149300  | -6.02995400 | -16.03717600 |
| C | -1.45129500 | -4.13783700 | -15.89414100 |
| C | -2.10938600 | -5.16770200 | -16.44899000 |
| H | -2.03007800 | -3.33906400 | -15.42317500 |
| C | 0.59610400  | -3.71224800 | -14.44298200 |
| C | 1.97982000  | -3.49623200 | -14.24542100 |
| C | -0.24767900 | -3.69829300 | -13.31052600 |
| C | 2.49614300  | -3.26016100 | -12.96380000 |
| H | 2.65228300  | -3.48936700 | -15.10078700 |
| C | 0.27128100  | -3.46860000 | -12.02622300 |
| H | -1.31572100 | -3.88491500 | -13.41971600 |
| C | 1.64453500  | -3.24376800 | -11.84639000 |
| H | 3.56789000  | -3.09084500 | -12.83989800 |
| H | -0.40321400 | -3.46919500 | -11.16735400 |
| H | 2.04822100  | -3.06303200 | -10.84801100 |
| H | -1.59671000 | -6.00323300 | -16.92911200 |
| H | -3.20151100 | -5.19956400 | -16.43207500 |

|   |             |             |              |
|---|-------------|-------------|--------------|
| H | 0.45203200  | -5.20124200 | -17.60875700 |
| C | -0.24621200 | -0.98597800 | -15.85410900 |
| H | 0.31827700  | -1.06282900 | -14.91611900 |
| H | -1.30568800 | -1.21618000 | -15.67723100 |
| C | -0.04796700 | 0.33002400  | -16.54813500 |
| C | 1.15761000  | 1.04220700  | -16.38580500 |
| C | -1.04414500 | 0.84252200  | -17.40331400 |
| C | 1.35666600  | 2.25853500  | -17.05592500 |
| H | 1.93255700  | 0.63933300  | -15.73091700 |
| C | -0.84498700 | 2.05938400  | -18.07279300 |
| H | -1.97395100 | 0.28604400  | -17.53675600 |
| C | 0.35568600  | 2.76973300  | -17.90032800 |
| H | 2.29132200  | 2.80661900  | -16.91962800 |
| H | -1.62503200 | 2.45225400  | -18.72833000 |
| H | 0.51013800  | 3.71753200  | -18.42040600 |
| S | 0.39219300  | -2.37435300 | -16.92667700 |
| O | 1.86549700  | -2.20473700 | -17.07720500 |
| O | -0.44506600 | -2.45021200 | -18.15579400 |

(S)-2a

|   |             |             |             |
|---|-------------|-------------|-------------|
| C | 0.81845200  | -5.08461900 | 16.57841200 |
| C | 0.04739300  | -3.97022800 | 15.84832200 |
| H | 1.89365400  | -4.86932700 | 16.60631900 |
| H | 0.66149300  | -6.02995400 | 16.03717600 |
| C | -1.45129500 | -4.13783700 | 15.89414100 |
| C | -2.10938600 | -5.16770200 | 16.44899000 |
| H | -2.03007800 | -3.33906400 | 15.42317500 |
| C | 0.59610400  | -3.71224800 | 14.44298200 |
| C | 1.97982000  | -3.49623200 | 14.24542100 |
| C | -0.24767900 | -3.69829300 | 13.31052600 |
| C | 2.49614300  | -3.26016100 | 12.96380000 |
| H | 2.65228300  | -3.48936700 | 15.10078700 |
| C | 0.27128100  | -3.46860000 | 12.02622300 |
| H | -1.31572100 | -3.88491500 | 13.41971600 |
| C | 1.64453500  | -3.24376800 | 11.84639000 |
| H | 3.56789000  | -3.09084500 | 12.83989800 |
| H | -0.40321400 | -3.46919500 | 11.16735400 |
| H | 2.04822100  | -3.06303200 | 10.84801100 |
| H | -1.59671000 | -6.00323300 | 16.92911200 |
| H | -3.20151100 | -5.19956400 | 16.43207500 |
| H | 0.45203200  | -5.20124200 | 17.60875700 |
| C | -0.24621200 | -0.98597800 | 15.85410900 |
| H | 0.31827700  | -1.06282900 | 14.91611900 |
| H | -1.30568800 | -1.21618000 | 15.67723100 |

|   |             |             |             |
|---|-------------|-------------|-------------|
| C | -0.04796700 | 0.33002400  | 16.54813500 |
| C | 1.15761000  | 1.04220700  | 16.38580500 |
| C | -1.04414500 | 0.84252200  | 17.40331400 |
| C | 1.35666600  | 2.25853500  | 17.05592500 |
| H | 1.93255700  | 0.63933300  | 15.73091700 |
| C | -0.84498700 | 2.05938400  | 18.07279300 |
| H | -1.97395100 | 0.28604400  | 17.53675600 |
| C | 0.35568600  | 2.76973300  | 17.90032800 |
| H | 2.29132200  | 2.80661900  | 16.91962800 |
| H | -1.62503200 | 2.45225400  | 18.72833000 |
| H | 0.51013800  | 3.71753200  | 18.42040600 |
| S | 0.39219300  | -2.37435300 | 16.92667700 |
| O | 1.86549700  | -2.20473700 | 17.07720500 |
| O | -0.44506600 | -2.45021200 | 18.15579400 |

**E-3a**

|   |             |             |             |
|---|-------------|-------------|-------------|
| C | 4.12986700  | -3.99208800 | 2.80454800  |
| C | 3.13132700  | -3.32232000 | 1.91789600  |
| C | 2.68705100  | -3.75339700 | 0.70961200  |
| H | 2.76727500  | -2.36938700 | 2.30511100  |
| C | 2.39638000  | -5.63764500 | 4.54913400  |
| H | 2.05347800  | -5.66854300 | 5.59533800  |
| H | 3.04721900  | -6.50224200 | 4.35829500  |
| C | 1.26198300  | -5.54999300 | 3.56630600  |
| C | 1.24149200  | -6.40094300 | 2.44487100  |
| C | 0.21362200  | -4.62438100 | 3.74927800  |
| C | 0.19787800  | -6.32164100 | 1.51035900  |
| H | 2.04914700  | -7.12299200 | 2.30617000  |
| C | -0.82470700 | -4.54015500 | 2.81095000  |
| H | 0.22646100  | -3.96427100 | 4.61737500  |
| C | -0.83320100 | -5.38520200 | 1.68729500  |
| H | 0.19358600  | -6.98549600 | 0.64358700  |
| H | -1.62690700 | -3.81344700 | 2.95406200  |
| H | -1.63960700 | -5.31310100 | 0.95486300  |
| S | 3.53646300  | -4.16786600 | 4.56244500  |
| O | 4.71417000  | -4.54884000 | 5.39076100  |
| O | 2.75199500  | -2.95530400 | 4.92539000  |
| H | 5.03562600  | -3.37726000 | 2.94692800  |
| H | 4.44077800  | -4.99787900 | 2.49359800  |
| C | 1.67144600  | -2.95815700 | -0.03655100 |
| C | 0.73085800  | -2.13987400 | 0.63742600  |
| C | 1.59669500  | -3.02178500 | -1.44882600 |
| C | -0.22707800 | -1.40367200 | -0.07074900 |
| H | 0.72940100  | -2.11187400 | 1.72709800  |

|   |             |             |             |
|---|-------------|-------------|-------------|
| C | 0.63797400  | -2.28276600 | -2.15900100 |
| H | 2.30109500  | -3.64595500 | -2.00023100 |
| C | -0.27863900 | -1.46852400 | -1.47482200 |
| H | -0.94637300 | -0.78979600 | 0.47625300  |
| H | 0.60859500  | -2.34575200 | -3.24919800 |
| H | -1.03025600 | -0.89931800 | -2.02604500 |
| C | 3.19835800  | -5.00818700 | 0.03092300  |
| H | 2.36786300  | -5.56542700 | -0.42811100 |
| H | 3.90411900  | -4.75074300 | -0.77875400 |
| H | 3.72118300  | -5.67922900 | 0.72406700  |

**IM1a-exo**

|   |             |             |             |
|---|-------------|-------------|-------------|
| C | -0.82386300 | -0.55160600 | -5.29263300 |
| C | 0.55771800  | -0.96294700 | -4.77351100 |
| H | -1.35727600 | -1.40191800 | -5.73686400 |
| H | -1.39743900 | -0.14354600 | -4.44758600 |
| O | 0.34186000  | -1.79265700 | -3.52601800 |
| C | 1.38231300  | 0.22433900  | -4.27088000 |
| C | 1.60324100  | 1.35994800  | -5.09795600 |
| H | 2.17881800  | -0.07407200 | -3.58115600 |
| C | 1.42423600  | -1.75600000 | -5.75580000 |
| C | 1.18429200  | -1.71196900 | -7.14099900 |
| C | 2.52852700  | -2.49278400 | -5.27919200 |
| C | 2.02508500  | -2.39929700 | -8.03308000 |
| H | 0.33628400  | -1.14848000 | -7.53075300 |
| C | 3.36151300  | -3.18734600 | -6.16704900 |
| H | 2.72602400  | -2.53142100 | -4.20650800 |
| C | 3.11300800  | -3.14393400 | -7.55080700 |
| H | 1.82182500  | -2.35623100 | -9.10543300 |
| H | 4.20640600  | -3.76076600 | -5.77913000 |
| H | 3.76245100  | -3.68280600 | -8.24386300 |
| C | -0.20060700 | -3.03001200 | -3.52716700 |
| O | -0.48883900 | -3.49890100 | -4.73179600 |
| O | -0.37717000 | -3.59033000 | -2.43958600 |
| H | 1.12776200  | 1.42925900  | -6.08005600 |
| H | 2.55455600  | 1.89696200  | -5.01959900 |
| H | -0.72103300 | 0.23526700  | -6.05223500 |
| C | -0.95747000 | -4.91204300 | -4.95625100 |
| C | 0.10617000  | -5.88379700 | -4.43725800 |
| C | -2.32525100 | -5.10615000 | -4.29730800 |
| C | -1.05873900 | -4.97400400 | -6.48292900 |
| H | 1.08534400  | -5.64408000 | -4.87974800 |
| H | 0.18057800  | -5.84930900 | -3.34262400 |
| H | -0.17505300 | -6.90436400 | -4.74042900 |

|    |             |             |             |
|----|-------------|-------------|-------------|
| H  | -3.03411500 | -4.34333400 | -4.65574200 |
| H  | -2.71072900 | -6.09886100 | -4.57810100 |
| H  | -2.25199200 | -5.05058500 | -3.20364000 |
| H  | -1.40166200 | -5.97829600 | -6.77474400 |
| H  | -1.78247000 | -4.23311600 | -6.85606700 |
| H  | -0.07897100 | -4.78378600 | -6.94573100 |
| Pd | 0.30580600  | 1.94772300  | -3.50121800 |
| P  | -0.08978900 | 4.15805400  | -3.70298900 |
| O  | 1.27320700  | 5.08488100  | -3.25190000 |
| O  | -1.21659100 | 4.88286200  | -2.63469900 |
| C  | 0.95009700  | 5.57455500  | -0.91871800 |
| C  | 1.61820500  | 4.86493600  | -1.91976200 |
| C  | 2.62791300  | 3.90812500  | -1.64102300 |
| C  | 2.97739800  | 3.65148400  | -0.32775000 |
| C  | 2.60606200  | 3.99108100  | 2.10381600  |
| C  | 1.89798600  | 4.57174000  | 3.14485000  |
| C  | 0.83862900  | 5.47607900  | 2.86087600  |
| C  | 0.52449000  | 5.81014700  | 1.55152400  |
| C  | 1.25440700  | 5.25899900  | 0.45533500  |
| C  | 2.29846500  | 4.30068100  | 0.74528600  |
| C  | -0.08306200 | 6.57073300  | -1.31504700 |
| C  | -1.11938500 | 6.18573600  | -2.17590500 |
| C  | -2.15472400 | 7.07946600  | -2.56093700 |
| C  | -2.14796600 | 8.38258400  | -2.10070100 |
| C  | -1.04482500 | 10.21127400 | -0.83233900 |
| C  | 0.01063400  | 10.67870000 | -0.06459900 |
| C  | 1.07271700  | 9.79985400  | 0.28353800  |
| C  | 1.05403900  | 8.47157500  | -0.11711600 |
| C  | -0.02983800 | 7.94703500  | -0.88578200 |
| C  | -1.08922000 | 8.85410600  | -1.26989900 |
| H  | 3.10262900  | 3.39044100  | -2.47439200 |
| H  | 3.75640200  | 2.92284600  | -0.09400000 |
| H  | 3.40272900  | 3.27064900  | 2.30335400  |
| H  | 2.13687500  | 4.32113900  | 4.18032500  |
| H  | 0.25849100  | 5.90449200  | 3.68058800  |
| H  | -0.29814100 | 6.49404600  | 1.34878700  |
| H  | -2.94294100 | 6.70861100  | -3.21718100 |
| H  | -2.94489600 | 9.07416000  | -2.38290000 |
| H  | -1.86002200 | 10.87730800 | -1.12562600 |
| H  | 0.03567500  | 11.72017100 | 0.26236100  |
| H  | 1.91588000  | 10.17446800 | 0.86783600  |
| H  | 1.88029900  | 7.81468500  | 0.14969600  |
| C  | -0.50313100 | 3.96239400  | -6.38298100 |
| C  | -0.21362800 | 6.24983500  | -5.55170500 |

|                  |             |             |              |
|------------------|-------------|-------------|--------------|
| C                | 0.76129500  | 4.13648600  | -7.23915900  |
| H                | -1.38695500 | 4.24953900  | -6.98027200  |
| H                | -0.61037000 | 2.91708200  | -6.06086800  |
| C                | 1.03381000  | 6.37895000  | -6.44897300  |
| H                | -1.09808400 | 6.61946300  | -6.10048000  |
| H                | -0.08407500 | 6.84795000  | -4.64165000  |
| H                | 1.62901800  | 3.82444700  | -6.62404000  |
| H                | 1.91123700  | 6.05926900  | -5.85349200  |
| N                | -0.43562000 | 4.83500000  | -5.19882300  |
| O                | 0.91790600  | 5.52242800  | -7.60229200  |
| C                | 1.22057900  | 7.80590100  | -6.95336200  |
| H                | 1.35484800  | 8.49104800  | -6.10113000  |
| H                | 2.10746000  | 7.87046100  | -7.60280800  |
| H                | 0.33742000  | 8.12652500  | -7.52964400  |
| C                | 0.69996400  | 3.31965900  | -8.52464700  |
| H                | 1.60087000  | 3.49325600  | -9.13338200  |
| H                | 0.63911900  | 2.24642600  | -8.28239700  |
| H                | -0.18601500 | 3.59971200  | -9.11767000  |
| Na               | -0.37935600 | -1.63024200 | -1.05598800  |
| C                | -1.34944700 | 2.60925100  | -0.38484100  |
| H                | -2.21040800 | 2.97936400  | -0.95757700  |
| H                | -0.55404600 | 3.36523700  | -0.39113600  |
| C                | -1.69921400 | 2.14451500  | 0.98683600   |
| C                | -2.94138200 | 1.52591300  | 1.24726400   |
| C                | -0.75701900 | 2.24847300  | 2.03231100   |
| C                | -3.23967500 | 1.03536400  | 2.52835600   |
| H                | -3.67092000 | 1.43797800  | 0.44015800   |
| C                | -1.05573500 | 1.76289800  | 3.31401100   |
| H                | 0.20448200  | 2.72266900  | 1.83539800   |
| C                | -2.29771500 | 1.15253400  | 3.56672100   |
| H                | -4.20830100 | 0.56666900  | 2.71896300   |
| H                | -0.32024400 | 1.86374900  | 4.11590600   |
| H                | -2.53277600 | 0.77707600  | 4.56550500   |
| S                | -0.65644000 | 1.19506900  | -1.45455700  |
| O                | -1.84757700 | 0.22389100  | -1.62927400  |
| O                | 0.42482800  | 0.54599000  | -0.56065700  |
| <b>IM1a-endo</b> |             |             |              |
| Pd               | 3.53571100  | -3.25946800 | -12.75357700 |
| P                | 2.01852400  | -1.66660800 | -13.22751100 |
| O                | 1.43890300  | -1.37676700 | -14.81133000 |
| O                | 2.72177600  | -0.13306700 | -12.95570200 |
| C                | 2.80958900  | 0.36155300  | -15.76081300 |
| C                | 2.38986300  | -0.97132100 | -15.73874900 |
| C                | 2.86540600  | -1.93719700 | -16.66287500 |

|   |             |             |              |
|---|-------------|-------------|--------------|
| C | 3.78856200  | -1.56889600 | -17.62320600 |
| C | 5.32259500  | 0.12520600  | -18.59067400 |
| C | 5.88828400  | 1.39063000  | -18.56812000 |
| C | 5.45993400  | 2.33789900  | -17.59733800 |
| C | 4.46136400  | 2.01754200  | -16.68875100 |
| C | 3.84166100  | 0.73127900  | -16.69718000 |
| C | 4.31095400  | -0.24329700 | -17.65572700 |
| C | 2.19618900  | 1.33130600  | -14.81146300 |
| C | 2.17174400  | 1.04215000  | -13.44212000 |
| C | 1.64436500  | 1.94770700  | -12.48311500 |
| C | 1.10160700  | 3.14939600  | -12.89608200 |
| C | 0.41576300  | 4.68463300  | -14.72267300 |
| C | 0.30097100  | 4.97609100  | -16.07305100 |
| C | 0.78996400  | 4.05246300  | -17.03688000 |
| C | 1.40326500  | 2.87221200  | -16.64144300 |
| C | 1.56389600  | 2.54974700  | -15.25890500 |
| C | 1.02954300  | 3.47430100  | -14.28276200 |
| H | 2.48276800  | -2.95553400 | -16.59608800 |
| H | 4.15509900  | -2.29834200 | -18.34832200 |
| H | 5.65534700  | -0.62175200 | -19.31530700 |
| H | 6.66890900  | 1.65841500  | -19.28312700 |
| H | 5.92378100  | 3.32597600  | -17.56334500 |
| H | 4.14848600  | 2.74995300  | -15.94593700 |
| H | 1.68107500  | 1.66930200  | -11.42931100 |
| H | 0.70070300  | 3.85665700  | -12.16665900 |
| H | 0.02751500  | 5.37263700  | -13.96769300 |
| H | -0.17458000 | 5.90347900  | -16.39870800 |
| H | 0.67667900  | 4.26990000  | -18.10111700 |
| H | 1.76195800  | 2.17229400  | -17.39420900 |
| C | 0.16419000  | -2.81584100 | -11.60274400 |
| C | -0.60653000 | -0.79662100 | -12.76257100 |
| C | -0.97559100 | -3.60161300 | -12.27259900 |
| H | -0.17650600 | -2.45743500 | -10.61418700 |
| H | 1.04017500  | -3.46882300 | -11.46411300 |
| C | -1.73148700 | -1.63401800 | -13.40012800 |
| H | -0.98269600 | -0.33166200 | -11.83353800 |
| H | -0.29154300 | -0.00624700 | -13.45289600 |
| H | -0.59219800 | -3.99832500 | -13.23555500 |
| H | -1.34959500 | -2.04185800 | -14.35652400 |
| N | 0.54305900  | -1.65610100 | -12.42577200 |
| O | -2.09049400 | -2.72998500 | -12.53721900 |
| C | -2.98825800 | -0.80316300 | -13.63611500 |
| H | -2.76698200 | 0.02589300  | -14.32717800 |
| H | -3.78380400 | -1.42622200 | -14.07372700 |

|   |             |             |              |
|---|-------------|-------------|--------------|
| H | -3.35312500 | -0.38285800 | -12.68473400 |
| C | -1.47653900 | -4.73751900 | -11.38726200 |
| H | -2.30755500 | -5.26855900 | -11.87690300 |
| H | -0.66077000 | -5.45342400 | -11.19707400 |
| H | -1.83176400 | -4.34099000 | -10.42211300 |
| C | 6.82005200  | -5.93443700 | -14.40827500 |
| C | 6.25931400  | -4.71934200 | -13.64924600 |
| C | 8.16640800  | -4.46598000 | -11.99436400 |
| H | 7.89343700  | -5.82997600 | -14.61462200 |
| H | 6.64716300  | -6.84158600 | -13.80982300 |
| O | 8.90209400  | -4.23145300 | -13.07153700 |
| O | 8.54158700  | -4.45762100 | -10.81666100 |
| O | 6.87467300  | -4.75897900 | -12.25530200 |
| C | 4.77055600  | -4.94817500 | -13.38883000 |
| C | 3.81464800  | -4.61766400 | -14.38623500 |
| H | 4.58202900  | -5.82184100 | -12.75451600 |
| C | 6.53307800  | -3.36511800 | -14.29985200 |
| C | 6.85615500  | -3.25333500 | -15.66274300 |
| C | 6.39242600  | -2.19086800 | -13.53247800 |
| C | 7.02473100  | -1.98857100 | -16.25348300 |
| H | 6.97591000  | -4.14794800 | -16.27420000 |
| C | 6.56137500  | -0.93029300 | -14.12241000 |
| H | 6.16328200  | -2.26503800 | -12.46916500 |
| C | 6.87222200  | -0.82252500 | -15.48846800 |
| H | 7.26175600  | -1.91624200 | -17.31660700 |
| H | 6.43663000  | -0.03208700 | -13.51377600 |
| H | 6.97960400  | 0.15780100  | -15.95513700 |
| H | 4.12590200  | -4.08681300 | -15.28971000 |
| H | 2.91824100  | -5.23852400 | -14.49591500 |
| H | 6.28009700  | -6.04625100 | -15.35919300 |
| C | 10.27579200 | -3.62094100 | -12.98579400 |
| C | 10.18365400 | -2.27433600 | -12.26188100 |
| C | 11.23354500 | -4.60484600 | -12.30922500 |
| C | 10.62857900 | -3.42452500 | -14.46277200 |
| H | 9.43474100  | -1.63219900 | -12.74984400 |
| H | 9.91934200  | -2.40382900 | -11.20400200 |
| H | 11.16511100 | -1.77869900 | -12.32194700 |
| H | 11.20475800 | -5.57971600 | -12.82108500 |
| H | 12.25691200 | -4.20417600 | -12.38303100 |
| H | 10.98163200 | -4.74208600 | -11.25001200 |
| H | 11.63033800 | -2.97381500 | -14.53146000 |
| H | 10.63979800 | -4.39001000 | -14.99218500 |
| H | 9.90279800  | -2.75595300 | -14.94907400 |
| C | 2.94038000  | -1.65243400 | -9.55770100  |



|    |            |             |              |
|----|------------|-------------|--------------|
| H  | 1.94258300 | -2.09037700 | -9.69204900  |
| H  | 3.02157100 | -0.71862500 | -10.13128200 |
| C  | 3.32536000 | -1.50142800 | -8.12628600  |
| C  | 2.81352400 | -2.38198400 | -7.14851900  |
| C  | 4.28136600 | -0.53735100 | -7.73875200  |
| C  | 3.23228300 | -2.28930700 | -5.81229900  |
| H  | 2.08158900 | -3.13648300 | -7.44355800  |
| C  | 4.70158700 | -0.44345900 | -6.40318600  |
| H  | 4.68870000 | 0.13823100  | -8.49309200  |
| C  | 4.17842300 | -1.31943200 | -5.43500700  |
| H  | 2.82002000 | -2.97161000 | -5.06509300  |
| H  | 5.43548800 | 0.31353000  | -6.11656000  |
| H  | 4.50196500 | -1.24387900 | -4.39434300  |
| S  | 4.11970500 | -2.85403200 | -10.46276300 |
| O  | 4.01098200 | -4.16993500 | -9.65734500  |
| Na | 6.41502800 | -4.41088300 | -9.74275900  |
| O  | 5.51107500 | -2.21757600 | -10.24467500 |

**IM1b-exo**

|   |             |             |             |
|---|-------------|-------------|-------------|
| C | 2.06712800  | -1.76531600 | -5.74764900 |
| C | 1.07830100  | -0.93833000 | -4.90741600 |
| H | 1.57798200  | -2.61648200 | -6.23974200 |
| H | 2.51992200  | -1.11895100 | -6.51263200 |
| O | 0.68827200  | -1.80136800 | -3.71928500 |
| C | 1.82275100  | 0.23488700  | -4.26982100 |
| C | 2.03216800  | 1.42862300  | -5.01148300 |
| H | 2.58908600  | -0.08323900 | -3.55456300 |
| C | -0.17384600 | -0.47451900 | -5.65132100 |
| C | -1.31504600 | -0.08718300 | -4.91696500 |
| C | -0.18681900 | -0.34232100 | -7.04946100 |
| C | -2.44722600 | 0.41487900  | -5.57448700 |
| H | -1.32216800 | -0.18771700 | -3.83083100 |
| C | -1.32035300 | 0.16905800  | -7.70878200 |
| H | 0.68378200  | -0.63385200 | -7.63654200 |
| C | -2.45388500 | 0.54859200  | -6.97463800 |
| H | -3.32183100 | 0.70667500  | -4.98900800 |
| H | -1.31010800 | 0.27006700  | -8.79587900 |
| H | -3.33319100 | 0.94594100  | -7.48612200 |
| C | -0.11823000 | -2.88164600 | -3.80650900 |
| O | -0.48364500 | -3.19265400 | -5.04178400 |
| O | -0.42462500 | -3.47104700 | -2.76464200 |
| H | 1.58712500  | 1.54392800  | -6.00302000 |
| H | 2.94503300  | 2.01049400  | -4.84414000 |
| H | 2.87199400  | -2.13191600 | -5.09288200 |

|    |             |             |             |
|----|-------------|-------------|-------------|
| C  | -1.58738500 | -4.17862200 | -5.32563300 |
| C  | -1.14532500 | -5.57958000 | -4.89659800 |
| C  | -2.86977100 | -3.71190700 | -4.63017300 |
| C  | -1.72045800 | -4.07694000 | -6.84756600 |
| H  | -0.18406100 | -5.83769000 | -5.36807600 |
| H  | -1.04762400 | -5.64983300 | -3.80587700 |
| H  | -1.90309400 | -6.30434700 | -5.23372500 |
| H  | -3.10646000 | -2.67747800 | -4.92218600 |
| H  | -3.69651700 | -4.36569100 | -4.94898300 |
| H  | -2.77761100 | -3.76962200 | -3.53756600 |
| H  | -2.51884300 | -4.75772100 | -7.17997200 |
| H  | -1.97983900 | -3.05064500 | -7.14700800 |
| H  | -0.78095900 | -4.37006700 | -7.34147900 |
| Pd | 0.63040100  | 1.86141200  | -3.44130200 |
| P  | 0.01636700  | 4.01684200  | -3.64071100 |
| O  | 1.24307600  | 5.12442600  | -3.20885300 |
| O  | -1.19506800 | 4.61081000  | -2.57428000 |
| C  | 0.86212600  | 5.64028100  | -0.89083500 |
| C  | 1.60676300  | 4.98102800  | -1.87157500 |
| C  | 2.71018500  | 4.14303800  | -1.56716800 |
| C  | 3.08927600  | 3.96924200  | -0.24876800 |
| C  | 2.69868400  | 4.35852500  | 2.17131100  |
| C  | 1.92914200  | 4.88362900  | 3.19762900  |
| C  | 0.77139700  | 5.64958800  | 2.89129400  |
| C  | 0.42007500  | 5.90698200  | 1.57406100  |
| C  | 1.20598900  | 5.40955100  | 0.49101000  |
| C  | 2.35220600  | 4.58443300  | 0.80562700  |
| C  | -0.29414700 | 6.47746200  | -1.31306800 |
| C  | -1.27352800 | 5.92613000  | -2.15149900 |
| C  | -2.42431000 | 6.65840300  | -2.55080600 |
| C  | -2.59168900 | 7.96502300  | -2.13354400 |
| C  | -1.73791100 | 9.96895600  | -0.94071400 |
| C  | -0.75164000 | 10.60088900 | -0.19922800 |
| C  | 0.42049800  | 9.88532900  | 0.16892400  |
| C  | 0.57996100  | 8.55378100  | -0.18737300 |
| C  | -0.42634000 | 7.86154900  | -0.92873100 |
| C  | -1.60079300 | 8.60388900  | -1.33142700 |
| H  | 3.23010200  | 3.64603300  | -2.38612300 |
| H  | 3.94039400  | 3.33370400  | 0.00447100  |
| H  | 3.57433500  | 3.74225200  | 2.38835200  |
| H  | 2.19688800  | 4.69458400  | 4.23910100  |
| H  | 0.14702200  | 6.03364400  | 3.70050300  |
| H  | -0.47417200 | 6.48809700  | 1.35446300  |
| H  | -3.15972100 | 6.16234900  | -3.18544600 |

|    |             |             |             |
|----|-------------|-------------|-------------|
| H  | -3.47756200 | 8.53177700  | -2.42864500 |
| H  | -2.63688100 | 10.50835200 | -1.24910300 |
| H  | -0.86564300 | 11.64712800 | 0.09178300  |
| H  | 1.20789700  | 10.38986800 | 0.73290700  |
| H  | 1.48871700  | 8.02458200  | 0.09540900  |
| C  | -0.45979300 | 3.72775000  | -6.31223000 |
| C  | -0.46273800 | 6.04685400  | -5.50280300 |
| C  | 0.65107400  | 4.10503600  | -7.30550700 |
| H  | -1.44137800 | 3.84262700  | -6.80582200 |
| H  | -0.34577000 | 2.68600900  | -5.98511300 |
| C  | 0.64187000  | 6.36794200  | -6.52880700 |
| H  | -1.44904200 | 6.26732600  | -5.94959900 |
| H  | -0.33199600 | 6.66503800  | -4.60666600 |
| H  | 1.62429700  | 3.94709000  | -6.79771400 |
| H  | 1.61955200  | 6.19666700  | -6.03576500 |
| N  | -0.40744600 | 4.61980400  | -5.14314500 |
| O  | 0.53740200  | 5.49564100  | -7.66944600 |
| C  | 0.54254800  | 7.80278500  | -7.03603900 |
| H  | 0.66057600  | 8.50766400  | -6.19763400 |
| H  | 1.32992200  | 8.00187900  | -7.77962600 |
| H  | -0.43880600 | 7.97450800  | -7.50751100 |
| C  | 0.57856400  | 3.28490100  | -8.58876000 |
| H  | 1.35730100  | 3.61211800  | -9.29542400 |
| H  | 0.72646700  | 2.21818200  | -8.36190500 |
| H  | -0.40661600 | 3.40759900  | -9.06760700 |
| Na | 0.18547200  | -1.80293400 | -1.17400900 |
| C  | -0.82191700 | 2.42082300  | -0.23139400 |
| H  | -1.68948900 | 2.82068300  | -0.77216300 |
| H  | -0.01269200 | 3.16089000  | -0.24685600 |
| C  | -1.14429600 | 1.93972300  | 1.14178400  |
| C  | -2.39687100 | 1.35357400  | 1.42665700  |
| C  | -0.17520500 | 2.00611500  | 2.16505800  |
| C  | -2.67739800 | 0.85680100  | 2.70911800  |
| H  | -3.14860300 | 1.29661100  | 0.63735900  |
| C  | -0.45609900 | 1.51503900  | 3.44879700  |
| H  | 0.79161400  | 2.46176100  | 1.95038200  |
| C  | -1.70791200 | 0.93643900  | 3.72537200  |
| H  | -3.65371400 | 0.41266000  | 2.91820700  |
| H  | 0.30009200  | 1.58872400  | 4.23429400  |
| H  | -1.92907000 | 0.55651900  | 4.72562100  |
| S  | -0.19108200 | 1.02836600  | -1.35652200 |
| O  | -1.37969600 | 0.03917500  | -1.44696200 |
| O  | 0.96452000  | 0.38077800  | -0.55730800 |

**IM1b-endo**

|    |             |             |              |
|----|-------------|-------------|--------------|
| Pd | 3.47559900  | -3.37879200 | -12.75768500 |
| P  | 1.97717300  | -1.76624300 | -13.22966500 |
| O  | 1.41118500  | -1.48849100 | -14.82015400 |
| O  | 2.67613900  | -0.22435500 | -12.96582500 |
| C  | 2.82999300  | 0.21398800  | -15.76291300 |
| C  | 2.39926500  | -1.11520800 | -15.72471500 |
| C  | 2.91718600  | -2.11114400 | -16.59214500 |
| C  | 3.90958500  | -1.78144200 | -17.49744000 |
| C  | 5.50637400  | -0.12271400 | -18.43000900 |
| C  | 6.05112500  | 1.15196500  | -18.43910500 |
| C  | 5.55376400  | 2.13977700  | -17.54511000 |
| C  | 4.51195600  | 1.84876600  | -16.67642300 |
| C  | 3.90980800  | 0.55393200  | -16.65548200 |
| C  | 4.44248300  | -0.45930800 | -17.54093200 |
| C  | 2.18560600  | 1.20390300  | -14.85574100 |
| C  | 2.12762300  | 0.93911500  | -13.48263700 |
| C  | 1.56441900  | 1.85630000  | -12.55577300 |
| C  | 1.02101600  | 3.04403500  | -13.00773500 |
| C  | 0.37676100  | 4.54021400  | -14.88246100 |
| C  | 0.30361900  | 4.80704500  | -16.24087300 |
| C  | 0.83413700  | 3.87312900  | -17.17259600 |
| C  | 1.44467100  | 2.70570600  | -16.73716600 |
| C  | 1.56030800  | 2.40825400  | -15.34469200 |
| C  | 0.98744600  | 3.34401100  | -14.40161100 |
| H  | 2.51814400  | -3.12270300 | -16.52380100 |
| H  | 4.31195700  | -2.53558700 | -18.17750600 |
| H  | 5.88895000  | -0.89842200 | -19.09789300 |
| H  | 6.86813200  | 1.39671800  | -19.12090400 |
| H  | 6.00017200  | 3.13635900  | -17.53715600 |
| H  | 4.14841500  | 2.61201100  | -15.99008200 |
| H  | 1.57391500  | 1.59878400  | -11.49607700 |
| H  | 0.59161700  | 3.76003500  | -12.30355900 |
| H  | -0.04153300 | 5.23786400  | -14.15291800 |
| H  | -0.16971000 | 5.72394500  | -16.59789500 |
| H  | 0.75568200  | 4.07295800  | -18.24338300 |
| H  | 1.83731800  | 1.99717500  | -17.46476600 |
| C  | 0.15466400  | -2.86642200 | -11.53281200 |
| C  | -0.65554400 | -0.91196500 | -12.77724000 |
| C  | -1.00427200 | -3.68754400 | -12.12322000 |
| H  | -0.15449900 | -2.45221700 | -10.55562200 |
| H  | 1.03603400  | -3.51014500 | -11.38568700 |
| C  | -1.79583300 | -1.78372600 | -13.33578700 |

|   |             |             |              |
|---|-------------|-------------|--------------|
| H | -1.00441800 | -0.39992700 | -11.86243300 |
| H | -0.36231200 | -0.15878500 | -13.51716400 |
| H | -0.64829500 | -4.13746700 | -13.07305300 |
| H | -1.43888100 | -2.24307800 | -14.27880800 |
| N | 0.50228700  | -1.75610600 | -12.43421300 |
| O | -2.12751900 | -2.83128400 | -12.40405700 |
| C | -3.06142300 | -0.96930600 | -13.58174500 |
| H | -2.86129600 | -0.17701700 | -14.32063700 |
| H | -3.86583800 | -1.61626900 | -13.96495700 |
| H | -3.40265900 | -0.50062100 | -12.64431200 |
| C | -1.47791300 | -4.77112700 | -11.16091200 |
| H | -2.32114900 | -5.32937300 | -11.59633600 |
| H | -0.65564300 | -5.47451700 | -10.95325000 |
| H | -1.80682200 | -4.32043600 | -10.21036100 |
| C | 6.20487200  | -4.82271800 | -13.49695900 |
| C | 8.04573000  | -5.19805700 | -11.80398900 |
| O | 8.85861100  | -5.00060700 | -12.83017800 |
| O | 8.35462000  | -5.41074300 | -10.62599200 |
| O | 6.73313600  | -5.15301900 | -12.11899900 |
| C | 4.70054900  | -5.07587700 | -13.35548000 |
| C | 3.80434900  | -4.71684000 | -14.39657200 |
| H | 4.47134500  | -5.96405700 | -12.75720700 |
| H | 4.17060100  | -4.18878200 | -15.28057400 |
| H | 2.91234600  | -5.32977800 | -14.56693300 |
| C | 10.35457200 | -5.11586200 | -12.70848500 |
| C | 10.87327800 | -4.04206700 | -11.74846700 |
| C | 10.71345100 | -6.53921500 | -12.27327100 |
| C | 10.81032200 | -4.84680400 | -14.14539600 |
| H | 10.52568100 | -3.04623700 | -12.06519300 |
| H | 10.54158100 | -4.23306700 | -10.71986600 |
| H | 11.97429400 | -4.05122900 | -11.77471500 |
| H | 10.25346800 | -7.27097100 | -12.95523400 |
| H | 11.80748900 | -6.65477600 | -12.32141300 |
| H | 10.38249600 | -6.73747000 | -11.24557200 |
| H | 11.90851600 | -4.90693300 | -14.18726600 |
| H | 10.38676700 | -5.59320700 | -14.83389800 |
| H | 10.50019200 | -3.84170300 | -14.47055100 |
| C | 3.14608700  | -1.56098500 | -9.65966800  |
| H | 2.10270100  | -1.89752500 | -9.73718500  |
| H | 3.30389800  | -0.68320000 | -10.30134500 |
| C | 3.59584600  | -1.35888500 | -8.25397700  |
| C | 3.03728400  | -2.12166300 | -7.20513000  |
| C | 4.65592400  | -0.47352700 | -7.96036500  |
| C | 3.51369100  | -1.98927300 | -5.89176400  |

|    |            |             |              |
|----|------------|-------------|--------------|
| H  | 2.22386600 | -2.81506300 | -7.42750900  |
| C  | 5.13384800 | -0.34025500 | -6.64766200  |
| H  | 5.09795500 | 0.11178900  | -8.76873100  |
| C  | 4.56428100 | -1.09795700 | -5.60846700  |
| H  | 3.06450400 | -2.57849900 | -5.08869700  |
| H  | 5.94852400 | 0.35584700  | -6.43426400  |
| H  | 4.93280300 | -0.99118300 | -4.58564600  |
| S  | 4.15542800 | -2.93917500 | -10.51700900 |
| O  | 3.94006100 | -4.17996300 | -9.61913000  |
| Na | 6.28999600 | -4.65431400 | -9.64286200  |
| O  | 5.61530800 | -2.44920600 | -10.40552800 |
| C  | 6.76597000 | -5.83119300 | -14.50350700 |
| C  | 6.91744700 | -7.18588100 | -14.14288700 |
| C  | 7.06742200 | -5.44188900 | -15.82172800 |
| C  | 7.38341900 | -8.12599900 | -15.07259900 |
| H  | 6.68317000 | -7.50094800 | -13.12457200 |
| C  | 7.52365000 | -6.38565200 | -16.75747800 |
| H  | 6.95451700 | -4.40009400 | -16.12286200 |
| C  | 7.68954400 | -7.72957600 | -16.38666400 |
| H  | 7.50534400 | -9.16893000 | -14.77146400 |
| H  | 7.75628300 | -6.06480000 | -17.77541800 |
| H  | 8.05145500 | -8.46094000 | -17.11234200 |
| C  | 6.53684400 | -3.35500500 | -13.79040900 |
| H  | 5.92870600 | -2.99505100 | -14.63191400 |
| H  | 6.27682600 | -2.76361600 | -12.90104400 |
| H  | 7.59882100 | -3.22286800 | -14.03542600 |

**TS1a-exo**

|   |             |             |             |
|---|-------------|-------------|-------------|
| C | 0.46981400  | -0.34770400 | -6.50477000 |
| C | 1.14244000  | -0.78039800 | -5.21694700 |
| H | -0.10260300 | -1.16639400 | -6.94865700 |
| H | -0.19589600 | 0.50233900  | -6.30843400 |
| O | -0.37961800 | -1.29812400 | -4.19540500 |
| C | 1.80097200  | 0.27651300  | -4.44013200 |
| C | 1.93504000  | 1.61798800  | -4.93836300 |
| H | 2.53827100  | -0.06473100 | -3.71079600 |
| C | 1.87865500  | -2.08696000 | -5.21139400 |
| C | 2.21070100  | -2.74225300 | -6.41444300 |
| C | 2.27509200  | -2.67419000 | -3.98673000 |
| C | 2.93020200  | -3.94784900 | -6.39621800 |
| H | 1.91211300  | -2.30973300 | -7.36869400 |
| C | 2.97525900  | -3.88593600 | -3.96843400 |
| H | 2.01714900  | -2.17792800 | -3.04971300 |
| C | 3.30956000  | -4.52791300 | -5.17554500 |

|    |             |             |             |
|----|-------------|-------------|-------------|
| H  | 3.18434300  | -4.43723400 | -7.33878300 |
| H  | 3.26204700  | -4.33054200 | -3.01308900 |
| H  | 3.85992700  | -5.47078800 | -5.16206900 |
| C  | -1.00355300 | -2.43780000 | -4.39769200 |
| O  | -0.93902100 | -2.88678400 | -5.66661300 |
| O  | -1.62054100 | -3.02508400 | -3.48269100 |
| H  | 1.53996100  | 1.88187100  | -5.92235500 |
| H  | 2.84212600  | 2.17216100  | -4.66588100 |
| H  | 1.24302300  | -0.02222100 | -7.22006100 |
| C  | -1.39356500 | -4.25155500 | -6.05228800 |
| C  | -0.62436400 | -5.30600200 | -5.24654000 |
| C  | -2.91380000 | -4.36845900 | -5.88615700 |
| C  | -1.00569400 | -4.32255500 | -7.53435900 |
| H  | 0.45908000  | -5.14141900 | -5.34636800 |
| H  | -0.90038900 | -5.27385000 | -4.18462900 |
| H  | -0.86698100 | -6.30381000 | -5.64579200 |
| H  | -3.41938900 | -3.55827600 | -6.43574100 |
| H  | -3.24553200 | -5.33179700 | -6.30576300 |
| H  | -3.20158900 | -4.32100900 | -4.82855800 |
| H  | -1.30801400 | -5.30032300 | -7.94018000 |
| H  | -1.51544700 | -3.53216700 | -8.10771000 |
| H  | 0.08214500  | -4.20981900 | -7.65340500 |
| Pd | 0.55640300  | 1.82903700  | -3.37151400 |
| P  | 0.10158600  | 4.01521800  | -3.51860800 |
| O  | 1.37607500  | 5.04508100  | -3.08645600 |
| O  | -1.09581700 | 4.63128000  | -2.45746900 |
| C  | 0.96658900  | 5.64850100  | -0.78956100 |
| C  | 1.71254700  | 4.94200200  | -1.73487000 |
| C  | 2.80260300  | 4.10470000  | -1.38712400 |
| C  | 3.15307000  | 3.96336100  | -0.05602700 |
| C  | 2.69193900  | 4.39221900  | 2.34493800  |
| C  | 1.90302300  | 4.95075100  | 3.33794100  |
| C  | 0.78031500  | 5.74786800  | 2.98460800  |
| C  | 0.47568100  | 5.99243100  | 1.65363000  |
| C  | 1.27616100  | 5.44898700  | 0.60402100  |
| C  | 2.39682100  | 4.60903800  | 0.96619600  |
| C  | -0.15555700 | 6.51076800  | -1.25327600 |
| C  | -1.14406500 | 5.96686400  | -2.08219000 |
| C  | -2.26299400 | 6.72043300  | -2.52481200 |
| C  | -2.38722800 | 8.04688000  | -2.15707400 |
| C  | -1.47863900 | 10.06013100 | -1.02143700 |
| C  | -0.48221700 | 10.68127000 | -0.28447200 |
| C  | 0.65679100  | 9.93760900  | 0.12922400  |
| C  | 0.77424300  | 8.58983500  | -0.17904900 |

|    |             |             |             |
|----|-------------|-------------|-------------|
| C  | -0.24352500 | 7.91028900  | -0.91597800 |
| C  | -1.38470900 | 8.67840200  | -1.36338000 |
| H  | 3.33913900  | 3.58507800  | -2.18110000 |
| H  | 3.99173900  | 3.32585200  | 0.23128500  |
| H  | 3.54405500  | 3.75753900  | 2.59922200  |
| H  | 2.12980100  | 4.76645300  | 4.38980500  |
| H  | 0.14435800  | 6.16399200  | 3.76850200  |
| H  | -0.39457000 | 6.59452000  | 1.39760300  |
| H  | -3.00986200 | 6.22722100  | -3.14793300 |
| H  | -3.24838100 | 8.63356700  | -2.48423700 |
| H  | -2.35307800 | 10.61980300 | -1.36220500 |
| H  | -0.56328600 | 11.74007900 | -0.03045800 |
| H  | 1.45140300  | 10.43274100 | 0.69130600  |
| H  | 1.65726000  | 8.03763500  | 0.13922300  |
| C  | -0.71392600 | 3.75563500  | -6.10548100 |
| C  | -0.27980500 | 6.06343900  | -5.38838100 |
| C  | 0.04837100  | 4.04613400  | -7.40792700 |
| H  | -1.79122100 | 3.94842200  | -6.26640800 |
| H  | -0.57927700 | 2.70497800  | -5.81008400 |
| C  | 0.46459200  | 6.29676200  | -6.71664200 |
| H  | -1.33715800 | 6.36292000  | -5.50625500 |
| H  | 0.17579900  | 6.66354800  | -4.59180700 |
| H  | 1.11709200  | 3.80476500  | -7.23655300 |
| H  | 1.53230500  | 6.04490100  | -6.55490300 |
| N  | -0.20226600 | 4.63322200  | -5.04107900 |
| O  | -0.06426000 | 5.44114700  | -7.74697600 |
| C  | 0.31962200  | 7.73714300  | -7.19670400 |
| H  | 0.74855300  | 8.42732500  | -6.45306200 |
| H  | 0.84552800  | 7.87587400  | -8.15397800 |
| H  | -0.74424800 | 7.98674200  | -7.33942100 |
| C  | -0.50218800 | 3.23811800  | -8.57806900 |
| H  | 0.04467100  | 3.48112600  | -9.50220300 |
| H  | -0.39481600 | 2.16066800  | -8.37517500 |
| H  | -1.56994700 | 3.46402600  | -8.73061500 |
| Na | -0.95536200 | -1.66064000 | -1.72301300 |
| C  | -0.33990500 | 2.47105500  | -0.01789200 |
| H  | -1.00787600 | 3.23720500  | -0.42854600 |
| H  | 0.69732100  | 2.82221300  | -0.06522600 |
| C  | -0.73046700 | 2.01256000  | 1.34564400  |
| C  | -2.08878200 | 1.96434800  | 1.72624700  |
| C  | 0.24901900  | 1.56752800  | 2.25870200  |
| C  | -2.45783400 | 1.49525400  | 2.99632900  |
| H  | -2.85002100 | 2.30299300  | 1.02110100  |
| C  | -0.11779500 | 1.10204100  | 3.53027900  |



|   |             |             |             |
|---|-------------|-------------|-------------|
| H | 1.29973300  | 1.60496700  | 1.96715600  |
| C | -1.47318600 | 1.06393700  | 3.90330400  |
| H | -3.51244500 | 1.47021400  | 3.28092800  |
| H | 0.65241600  | 0.77182900  | 4.23149500  |
| H | -1.75988100 | 0.70475300  | 4.89444300  |
| S | -0.39451900 | 1.07695300  | -1.30147300 |
| O | -1.85949600 | 0.59942500  | -1.33091300 |
| O | 0.51923000  | -0.02275300 | -0.71003400 |

**IM2a-exo**

|   |             |             |             |
|---|-------------|-------------|-------------|
| C | 0.10612200  | 1.28589200  | -7.79193500 |
| C | 1.28759900  | 1.05912800  | -6.86501800 |
| H | -0.81852200 | 0.93373000  | -7.31169100 |
| H | -0.01608200 | 2.34250500  | -8.05834100 |
| O | -1.85031900 | -3.32181600 | -3.82624100 |
| C | 2.31440300  | 2.02708600  | -6.71078900 |
| C | 2.14408600  | 3.42160000  | -6.95193500 |
| H | 3.22725000  | 1.72567700  | -6.19339900 |
| C | 1.47919900  | -0.31704300 | -6.33814500 |
| C | 0.71997600  | -1.39821100 | -6.85643200 |
| C | 2.39276300  | -0.60101200 | -5.29087500 |
| C | 0.89784400  | -2.70734100 | -6.38236800 |
| H | -0.01357000 | -1.22470100 | -7.64149800 |
| C | 2.56782900  | -1.90625500 | -4.81533500 |
| H | 2.93550900  | 0.20702800  | -4.80568200 |
| C | 1.82784700  | -2.97106900 | -5.36139100 |
| H | 0.29515900  | -3.51610400 | -6.79811100 |
| H | 3.26042800  | -2.08849400 | -3.99208500 |
| H | 1.94599200  | -3.98172400 | -4.97005600 |
| C | -1.16479300 | -3.77667400 | -2.86412200 |
| O | -1.76522100 | -4.89507800 | -2.26080300 |
| O | -0.05648800 | -3.33867700 | -2.43383000 |
| H | 1.47847500  | 3.78998100  | -7.73551500 |
| H | 2.97889800  | 4.08096500  | -6.70683500 |
| H | 0.24870300  | 0.71198500  | -8.72455100 |
| C | -1.12434300 | -5.62694000 | -1.16952800 |
| C | 0.22567900  | -6.21642500 | -1.61680900 |
| C | -0.97149700 | -4.74186900 | 0.08013500  |
| C | -2.11620300 | -6.76607800 | -0.88068100 |
| H | 0.08503700  | -6.82297900 | -2.52736100 |
| H | 0.94279900  | -5.41347800 | -1.82901600 |
| H | 0.63146900  | -6.86857100 | -0.82501300 |
| H | -1.95646900 | -4.35552200 | 0.38820100  |
| H | -0.55686700 | -5.33725900 | 0.91146800  |

|    |             |             |             |
|----|-------------|-------------|-------------|
| H  | -0.30608600 | -3.89551900 | -0.13009200 |
| H  | -1.74201900 | -7.39354500 | -0.05524700 |
| H  | -3.09867500 | -6.35710200 | -0.59421800 |
| H  | -2.24695300 | -7.39969800 | -1.77291500 |
| Pd | 0.82810300  | 2.87196500  | -5.29269800 |
| P  | 0.57452900  | 4.91658300  | -4.38597600 |
| O  | 1.82547600  | 5.36263900  | -3.37272900 |
| O  | -0.73699600 | 4.98958100  | -3.32645700 |
| C  | 1.07975000  | 4.72404900  | -1.16419900 |
| C  | 1.93863000  | 4.52853700  | -2.24604500 |
| C  | 2.93727300  | 3.52579100  | -2.27659700 |
| C  | 3.06554200  | 2.66997500  | -1.19800300 |
| C  | 2.25280400  | 1.83349800  | 0.99226800  |
| C  | 1.35068100  | 1.88856700  | 2.04317400  |
| C  | 0.32737300  | 2.87535200  | 2.04650000  |
| C  | 0.23365300  | 3.80251500  | 1.01901100  |
| C  | 1.16048800  | 3.79153100  | -0.06642700 |
| C  | 2.17827000  | 2.76430800  | -0.08625300 |
| C  | 0.08412300  | 5.83124600  | -1.20954500 |
| C  | -0.79019000 | 5.93013600  | -2.29517300 |
| C  | -1.79707900 | 6.92372700  | -2.38381300 |
| C  | -1.91830500 | 7.86141300  | -1.37521500 |
| C  | -1.10540000 | 8.85347600  | 0.75119500  |
| C  | -0.20536400 | 8.87207400  | 1.80517800  |
| C  | 0.82611200  | 7.89581200  | 1.87112800  |
| C  | 0.93166100  | 6.90919600  | 0.90140300  |
| C  | 0.00763500  | 6.84408600  | -0.18528300 |
| C  | -1.01997300 | 7.85864200  | -0.26761200 |
| H  | 3.58027400  | 3.44763100  | -3.15359200 |
| H  | 3.82696200  | 1.88766500  | -1.19954500 |
| H  | 3.02807900  | 1.06476300  | 0.96085200  |
| H  | 1.41140600  | 1.16513500  | 2.85833500  |
| H  | -0.40034200 | 2.89707400  | 2.85992400  |
| H  | -0.56348600 | 4.54390800  | 1.02687200  |
| H  | -2.46144700 | 6.92216700  | -3.24835800 |
| H  | -2.69508500 | 8.62729500  | -1.42341500 |
| H  | -1.89363100 | 9.60626000  | 0.67607800  |
| H  | -0.27868600 | 9.63933200  | 2.57838500  |
| H  | 1.54694600  | 7.92480200  | 2.69078200  |
| H  | 1.73157500  | 6.17288600  | 0.96233600  |
| C  | -0.08037200 | 6.12906400  | -6.72333700 |
| C  | 0.65588400  | 7.64189200  | -4.93754600 |
| C  | 0.71921700  | 6.97063600  | -7.73069200 |
| H  | -1.11563500 | 6.51368500  | -6.67142300 |

|    |             |             |             |
|----|-------------|-------------|-------------|
| H  | -0.10914500 | 5.07657000  | -7.03612800 |
| C  | 1.42928500  | 8.45181000  | -5.99403500 |
| H  | -0.35706200 | 8.06605200  | -4.82012800 |
| H  | 1.17762400  | 7.68185000  | -3.97439500 |
| H  | 1.74504300  | 6.55385500  | -7.78582400 |
| H  | 2.45377900  | 8.03343600  | -6.06029300 |
| N  | 0.56005400  | 6.23826100  | -5.39750800 |
| O  | 0.79391300  | 8.33532800  | -7.28040600 |
| C  | 1.47541800  | 9.93357700  | -5.63630500 |
| H  | 1.99281900  | 10.07372400 | -4.67419200 |
| H  | 2.01462000  | 10.49542200 | -6.41432100 |
| H  | 0.45410100  | 10.33847300 | -5.55194800 |
| C  | 0.06477100  | 6.97254900  | -9.10792800 |
| H  | 0.64089800  | 7.60333000  | -9.80198100 |
| H  | 0.02658300  | 5.94753800  | -9.51026900 |
| H  | -0.96239900 | 7.36594900  | -9.04334200 |
| Na | -0.22450600 | -1.55819600 | -4.06935800 |
| C  | -1.42077100 | 2.12588800  | -2.44692400 |
| H  | -2.23834200 | 2.67243800  | -2.93498300 |
| H  | -0.75657700 | 2.82020700  | -1.91931300 |
| C  | -1.86817000 | 0.98131900  | -1.59790300 |
| C  | -2.99907200 | 0.21636900  | -1.95374300 |
| C  | -1.08502900 | 0.57861800  | -0.49599700 |
| C  | -3.34473500 | -0.92538000 | -1.21496900 |
| H  | -3.59686200 | 0.51407800  | -2.81656000 |
| C  | -1.43566300 | -0.55698400 | 0.24738800  |
| H  | -0.20089500 | 1.15671400  | -0.22921200 |
| C  | -2.56287800 | -1.31540400 | -0.11432500 |
| H  | -4.21683000 | -1.51580800 | -1.50334200 |
| H  | -0.82296800 | -0.85680100 | 1.10058200  |
| H  | -2.82935700 | -2.20658000 | 0.45635600  |
| S  | -0.37675600 | 1.41807400  | -3.86883900 |
| O  | -1.36479600 | 0.59259100  | -4.69374600 |
| O  | 0.66116300  | 0.55612700  | -3.15526500 |

**IM2a'-exo**

|    |            |             |              |
|----|------------|-------------|--------------|
| Pd | 1.50906700 | -1.98523600 | -11.17637200 |
| P  | 0.51081500 | -0.65251100 | -12.63937900 |
| O  | 1.23426500 | -0.65314200 | -14.15304900 |
| O  | 0.68759100 | 0.97658600  | -12.23704800 |
| C  | 2.73862000 | 1.23009000  | -14.14668200 |
| C  | 2.54485400 | -0.15135700 | -14.14692200 |
| C  | 3.60962300 | -1.08439300 | -14.15330700 |
| C  | 4.91295700 | -0.61956600 | -14.15019000 |

|   |             |             |              |
|---|-------------|-------------|--------------|
| C | 6.52622400  | 1.26599700  | -14.01861000 |
| C | 6.78285000  | 2.62407100  | -13.90753200 |
| C | 5.70321300  | 3.54760000  | -13.83834600 |
| C | 4.38899300  | 3.10941500  | -13.90627900 |
| C | 4.09041600  | 1.72207300  | -14.05821700 |
| C | 5.18687200  | 0.77846600  | -14.08496300 |
| C | 1.54869900  | 2.12136200  | -14.18535400 |
| C | 0.55287500  | 1.96762600  | -13.22390800 |
| C | -0.57741000 | 2.81225900  | -13.13847500 |
| C | -0.74162200 | 3.81845200  | -14.07162600 |
| C | 0.02329000  | 5.00355800  | -16.11637800 |
| C | 0.93150500  | 5.15460200  | -17.15298100 |
| C | 2.05583600  | 4.28868600  | -17.23959100 |
| C | 2.26582200  | 3.30302600  | -16.28586600 |
| C | 1.36425300  | 3.13373900  | -15.19192900 |
| C | 0.20528900  | 3.99609500  | -15.12314800 |
| H | 3.37833500  | -2.14929800 | -14.16164600 |
| H | 5.75006900  | -1.32070700 | -14.16675000 |
| H | 7.34453100  | 0.54261700  | -14.04660200 |
| H | 7.81167700  | 2.98602500  | -13.85554900 |
| H | 5.91024700  | 4.61247500  | -13.71504400 |
| H | 3.56763600  | 3.81498200  | -13.80885800 |
| H | -1.27877500 | 2.66900600  | -12.31826900 |
| H | -1.60179200 | 4.48894900  | -14.01597900 |
| H | -0.85350000 | 5.65148900  | -16.04370400 |
| H | 0.78166700  | 5.92914200  | -17.90782700 |
| H | 2.75976100  | 4.39671400  | -18.06744800 |
| H | 3.12784400  | 2.64269200  | -16.37101500 |
| C | -1.81486800 | -0.32654600 | -14.13759400 |
| C | -1.86761500 | -1.93804400 | -12.27125100 |
| C | -3.07449100 | 0.33056500  | -13.54408800 |
| H | -2.11726500 | -1.08149700 | -14.88455900 |
| H | -1.18454700 | 0.42435000  | -14.62827100 |
| C | -3.11149800 | -1.21542300 | -11.73093300 |
| H | -2.18702300 | -2.77166300 | -12.92168300 |
| H | -1.26550600 | -2.34085200 | -11.44404500 |
| H | -2.75241200 | 1.11578700  | -12.83569200 |
| H | -2.76969700 | -0.40174400 | -11.06030400 |
| N | -1.04890900 | -1.00826200 | -13.07241200 |
| O | -3.85340600 | -0.64301000 | -12.82384000 |
| C | -4.03849500 | -2.16830600 | -10.98515800 |
| H | -3.52182100 | -2.58542600 | -10.10579300 |
| H | -4.93869100 | -1.63424400 | -10.64455400 |
| H | -4.34791700 | -2.99742700 | -11.64199300 |

|   |             |             |              |
|---|-------------|-------------|--------------|
| C | -3.95618300 | 0.92868600  | -14.63401400 |
| H | -4.86517300 | 1.36456100  | -14.19167300 |
| H | -3.40599800 | 1.72074800  | -15.16609500 |
| H | -4.25196300 | 0.15291900  | -15.35868600 |
| C | 1.27181700  | -4.96983000 | -9.68288200  |
| C | 2.51791600  | -4.37861400 | -10.30925900 |
| C | 3.48154500  | -0.68782800 | -9.28491000  |
| H | 1.32232700  | -6.07218500 | -9.74017900  |
| H | 1.19798600  | -4.70033900 | -8.62092700  |
| O | 1.92498000  | -0.48947100 | -9.53455600  |
| O | 3.81059900  | -1.07545600 | -8.17156300  |
| O | 4.04548400  | -0.38536700 | -10.35145900 |
| C | 2.53897500  | -3.95434400 | -11.64716800 |
| C | 1.37619500  | -3.66079400 | -12.43918500 |
| H | 3.50937300  | -3.72728200 | -12.09373500 |
| C | 3.77728200  | -4.44072900 | -9.54217700  |
| C | 3.91856800  | -5.35611500 | -8.46746100  |
| C | 4.88048000  | -3.60659300 | -9.85890300  |
| C | 5.12778100  | -5.46223400 | -7.76838400  |
| H | 3.08770600  | -6.00642500 | -8.19356300  |
| C | 6.08447700  | -3.71313000 | -9.15569400  |
| H | 4.77362700  | -2.83004000 | -10.61512600 |
| C | 6.21847900  | -4.64578600 | -8.11237500  |
| H | 5.21783900  | -6.18405300 | -6.95397600  |
| H | 6.91258300  | -3.04718500 | -9.40627700  |
| H | 7.15799900  | -4.72340600 | -7.56140900  |
| H | 0.42072800  | -4.15363300 | -12.23148900 |
| H | 1.53914500  | -3.44337300 | -13.49795800 |
| H | 0.35624300  | -4.64737700 | -10.19291700 |
| C | 0.94043100  | -0.47756100 | -8.43154900  |
| C | 0.81431900  | -1.88375300 | -7.83478500  |
| C | 1.35091000  | 0.56730900  | -7.38404800  |
| C | -0.37913900 | -0.05112300 | -9.09134200  |
| H | 0.48580700  | -2.58941500 | -8.61548300  |
| H | 1.77708700  | -2.21904500 | -7.42891000  |
| H | 0.05970200  | -1.88478800 | -7.03054600  |
| H | 1.44753200  | 1.55397700  | -7.85980900  |
| H | 0.56315500  | 0.62748600  | -6.61480000  |
| H | 2.29651900  | 0.29054600  | -6.90286600  |
| H | -1.16736500 | 0.01383100  | -8.32300300  |
| H | -0.26559800 | 0.93006600  | -9.57370200  |
| H | -0.69110200 | -0.79372700 | -9.84278900  |
| C | 2.78692900  | 5.22429800  | -9.37605000  |
| H | 2.33307200  | 5.53813800  | -8.42487800  |

|    |            |            |              |
|----|------------|------------|--------------|
| H  | 3.11938800 | 6.09490200 | -9.96027300  |
| C  | 3.81258000 | 4.17135900 | -9.23424300  |
| C  | 3.75726800 | 3.24952000 | -8.16222200  |
| C  | 4.72222300 | 3.91520500 | -10.29000800 |
| C  | 4.61757600 | 2.14214200 | -8.11880500  |
| H  | 3.03646200 | 3.41222400 | -7.35955400  |
| C  | 5.57262200 | 2.79959300 | -10.25491100 |
| H  | 4.74880200 | 4.59356000 | -11.14187900 |
| C  | 5.52845500 | 1.91326000 | -9.16471100  |
| H  | 4.55632700 | 1.43587800 | -7.29092200  |
| H  | 6.25143700 | 2.61209000 | -11.08901500 |
| H  | 6.17013600 | 1.03309600 | -9.14453100  |
| S  | 1.31594200 | 4.43559600 | -10.44741400 |
| O  | 2.10183000 | 3.94435600 | -11.68346700 |
| Na | 2.67208700 | 1.74728600 | -10.60686000 |
| O  | 0.90940000 | 3.22185800 | -9.57494500  |

**TS2a-exo**

|    |             |             |              |
|----|-------------|-------------|--------------|
| Pd | 1.47923500  | -2.09094600 | -11.11655300 |
| P  | 0.40647300  | -0.77207900 | -12.53252000 |
| O  | 1.09893200  | -0.75941700 | -14.06822200 |
| O  | 0.57336600  | 0.85659500  | -12.14327600 |
| C  | 2.61476700  | 1.11796600  | -14.05649600 |
| C  | 2.41109100  | -0.26294200 | -14.07993300 |
| C  | 3.47156000  | -1.20093800 | -14.12090300 |
| C  | 4.77813900  | -0.74492400 | -14.11666300 |
| C  | 6.40380300  | 1.12644700  | -13.94101300 |
| C  | 6.66908300  | 2.47951000  | -13.79436500 |
| C  | 5.59506200  | 3.40798400  | -13.70404300 |
| C  | 4.27801900  | 2.98002600  | -13.78517500 |
| C  | 3.97050500  | 1.59844700  | -13.96729200 |
| C  | 5.06130500  | 0.64935200  | -14.01888600 |
| C  | 1.42848900  | 2.01526800  | -14.08207500 |
| C  | 0.42544700  | 1.84196900  | -13.13134600 |
| C  | -0.73211700 | 2.65038200  | -13.06412900 |
| C  | -0.89774400 | 3.66580500  | -13.98731300 |
| C  | -0.11562600 | 4.89874100  | -15.99611100 |
| C  | 0.80294400  | 5.07756700  | -17.01894200 |
| C  | 1.94026700  | 4.22856000  | -17.10385400 |
| C  | 2.15292600  | 3.23272500  | -16.16142200 |
| C  | 1.24165500  | 3.03589400  | -15.07995100 |
| C  | 0.06826500  | 3.87984600  | -15.01462500 |
| H  | 3.23363300  | -2.26306500 | -14.16107400 |
| H  | 5.61043500  | -1.45084300 | -14.16025700 |

|   |             |             |              |
|---|-------------|-------------|--------------|
| H | 7.21758800  | 0.39885600  | -13.98866000 |
| H | 7.70019600  | 2.83363800  | -13.73334600 |
| H | 5.80875800  | 4.46849100  | -13.55638300 |
| H | 3.46084500  | 3.68750700  | -13.66897000 |
| H | -1.45979600 | 2.46200900  | -12.27510100 |
| H | -1.77769500 | 4.31130500  | -13.94808500 |
| H | -1.00334100 | 5.53195900  | -15.92622200 |
| H | 0.65110400  | 5.86035900  | -17.76483500 |
| H | 2.65238100  | 4.35782300  | -17.92162100 |
| H | 3.02554000  | 2.58654500  | -16.24573400 |
| C | -1.90193900 | -2.19194200 | -12.24500100 |
| C | -1.91546200 | -0.49631100 | -14.03578700 |
| C | -2.28175100 | -3.25170900 | -13.29277300 |
| H | -2.81913000 | -1.79321000 | -11.77727000 |
| H | -1.26658700 | -2.63450600 | -11.46414400 |
| C | -2.29991500 | -1.60801500 | -15.02878700 |
| H | -2.82974300 | -0.01105500 | -13.65317000 |
| H | -1.29446600 | 0.25713500  | -14.53337800 |
| H | -1.34405600 | -3.66878600 | -13.71225300 |
| H | -1.36391200 | -2.04019000 | -15.43516600 |
| N | -1.18083200 | -1.08223500 | -12.89460200 |
| O | -3.03847600 | -2.64488100 | -14.35649500 |
| C | -3.17670000 | -1.07235900 | -16.15544700 |
| H | -2.63016000 | -0.30386400 | -16.72474700 |
| H | -3.45867000 | -1.88724500 | -16.83988600 |
| H | -4.09480700 | -0.62264100 | -15.74412400 |
| C | -3.13794800 | -4.35935200 | -12.68912700 |
| H | -3.42281100 | -5.08694000 | -13.46447600 |
| H | -2.57648500 | -4.88526000 | -11.89994700 |
| H | -4.05474400 | -3.93652900 | -12.24766700 |
| C | 1.62827500  | -4.99406000 | -9.61721200  |
| C | 2.74426900  | -4.31460800 | -10.38868100 |
| C | 3.89659500  | -0.82564800 | -9.25094900  |
| H | 1.81790100  | -6.08204900 | -9.57382500  |
| H | 1.57880100  | -4.62761600 | -8.58312000  |
| O | 1.79532600  | -0.64638200 | -9.56207800  |
| O | 4.03714300  | -1.27042400 | -8.15790600  |
| O | 4.20239100  | -0.39788500 | -10.32630200 |
| C | 2.58619000  | -3.96112700 | -11.74134300 |
| C | 1.33450300  | -3.77280700 | -12.41083300 |
| H | 3.47496500  | -3.67542800 | -12.30521100 |
| C | 4.08425700  | -4.25867300 | -9.76161300  |
| C | 4.35227800  | -4.98522600 | -8.57291400  |
| C | 5.14821100  | -3.49728900 | -10.31566200 |

|    |             |             |              |
|----|-------------|-------------|--------------|
| C  | 5.62278800  | -4.96920400 | -7.98078200  |
| H  | 3.56683700  | -5.58257900 | -8.11099800  |
| C  | 6.41344900  | -3.47874400 | -9.72073300  |
| H  | 4.97907600  | -2.87544500 | -11.19281200 |
| C  | 6.66282100  | -4.21859700 | -8.55113000  |
| H  | 5.79748000  | -5.54572500 | -7.06984900  |
| H  | 7.20503300  | -2.87191800 | -10.16565700 |
| H  | 7.65061400  | -4.20010200 | -8.08626400  |
| H  | 0.43828400  | -4.31931600 | -12.10120200 |
| H  | 1.37430400  | -3.55091000 | -13.47948400 |
| H  | 0.64791500  | -4.83963800 | -10.08376800 |
| C  | 0.83471600  | -0.62078900 | -8.49698200  |
| C  | 0.68895300  | -2.02025800 | -7.87068400  |
| C  | 1.31182200  | 0.39557100  | -7.43994500  |
| C  | -0.52201500 | -0.15448900 | -9.06465700  |
| H  | 0.30745300  | -2.72754000 | -8.62617300  |
| H  | 1.66448700  | -2.38106100 | -7.51242400  |
| H  | -0.01875900 | -2.00569700 | -7.02396800  |
| H  | 1.40973700  | 1.39338500  | -7.89309400  |
| H  | 0.57398000  | 0.46239200  | -6.62204600  |
| H  | 2.27758700  | 0.08894500  | -7.01567500  |
| H  | -1.28129800 | -0.10692700 | -8.26474300  |
| H  | -0.41797300 | 0.84328700  | -9.51581500  |
| H  | -0.87265500 | -0.86073400 | -9.83518100  |
| C  | 2.77189500  | 5.08192300  | -9.25208900  |
| H  | 2.30941300  | 5.45028300  | -8.32484700  |
| H  | 3.15272300  | 5.91883500  | -9.85630900  |
| C  | 3.77221900  | 4.01426800  | -9.03239000  |
| C  | 3.69902500  | 3.16796000  | -7.90171500  |
| C  | 4.71987600  | 3.70442600  | -10.03933800 |
| C  | 4.59174900  | 2.09523700  | -7.74566900  |
| H  | 2.95064100  | 3.37065600  | -7.13383700  |
| C  | 5.60569900  | 2.62774700  | -9.88878400  |
| H  | 4.76040900  | 4.32085500  | -10.93668200 |
| C  | 5.55618200  | 1.82850100  | -8.73271100  |
| H  | 4.53075200  | 1.46503500  | -6.85690800  |
| H  | 6.32638300  | 2.40725700  | -10.67896400 |
| H  | 6.24549200  | 0.99080800  | -8.61306500  |
| S  | 1.29500200  | 4.33047500  | -10.32318400 |
| O  | 2.07846200  | 3.73146800  | -11.51418700 |
| Na | 2.38804600  | 1.53462000  | -10.40378700 |
| O  | 0.79017800  | 3.18925600  | -9.40514600  |

IM3a-*exo*



|    |             |             |              |
|----|-------------|-------------|--------------|
| Pd | 2.15427900  | -1.91369900 | -11.03346900 |
| P  | 1.13507300  | -0.65088900 | -12.53904000 |
| O  | 1.64768800  | -0.55553600 | -14.14278200 |
| O  | 1.26436100  | 0.97493400  | -12.10996100 |
| C  | 2.68976500  | 1.60531900  | -14.45906900 |
| C  | 2.76681800  | 0.21012800  | -14.46622500 |
| C  | 3.93828900  | -0.49083400 | -14.84823800 |
| C  | 5.07673100  | 0.21698000  | -15.19009900 |
| C  | 6.28823800  | 2.37663400  | -15.37898600 |
| C  | 6.31641400  | 3.75573400  | -15.24675900 |
| C  | 5.14557400  | 4.45186300  | -14.83782500 |
| C  | 3.96464200  | 3.76788000  | -14.58964300 |
| C  | 3.89371000  | 2.34868100  | -14.73347200 |
| C  | 5.09472900  | 1.64039800  | -15.11662200 |
| C  | 1.40067800  | 2.27672600  | -14.13418600 |
| C  | 0.73629200  | 1.95861200  | -12.95145500 |
| C  | -0.46715600 | 2.58020600  | -12.54158400 |
| C  | -1.04443300 | 3.53287300  | -13.35921500 |
| C  | -1.08178900 | 4.80114800  | -15.49339500 |
| C  | -0.53645100 | 5.08751300  | -16.73529300 |
| C  | 0.65493200  | 4.43332900  | -17.15196100 |
| C  | 1.29254300  | 3.52471800  | -16.31942700 |
| C  | 0.77224600  | 3.22205300  | -15.02469300 |
| C  | -0.45908900 | 3.86304500  | -14.61750400 |
| H  | 3.91362800  | -1.58007100 | -14.86867100 |
| H  | 5.98559600  | -0.30828900 | -15.49046100 |
| H  | 7.18429900  | 1.82454200  | -15.67182500 |
| H  | 7.23745900  | 4.30837200  | -15.44199200 |
| H  | 5.17722600  | 5.53560200  | -14.70967500 |
| H  | 3.08001800  | 4.31199800  | -14.26325600 |
| H  | -0.90593400 | 2.29510000  | -11.58623100 |
| H  | -1.96772400 | 4.03308100  | -13.05998700 |
| H  | -2.00561100 | 5.28296800  | -15.16450700 |
| H  | -1.02384500 | 5.80491100  | -17.39851100 |
| H  | 1.07120200  | 4.64368000  | -18.13931900 |
| H  | 2.19978700  | 3.02614900  | -16.65680200 |
| C  | -1.12999500 | -2.13179900 | -12.12563700 |
| C  | -1.28243400 | -0.46685900 | -13.92453200 |
| C  | -1.53917000 | -3.21426100 | -13.13782100 |
| H  | -2.02838500 | -1.75090600 | -11.60886500 |
| H  | -0.44710400 | -2.55887500 | -11.37902200 |
| C  | -1.69137100 | -1.59682200 | -14.88548300 |
| H  | -2.18702600 | -0.00430200 | -13.49404300 |
| H  | -0.71724200 | 0.29767900  | -14.46728700 |

|   |             |             |              |
|---|-------------|-------------|--------------|
| H | -0.61262200 | -3.61369900 | -13.60076400 |
| H | -0.76801000 | -2.00913100 | -15.33897200 |
| N | -0.46706200 | -1.01388200 | -12.81842600 |
| O | -2.36626300 | -2.64730500 | -14.16864700 |
| C | -2.63956700 | -1.09125200 | -15.96758400 |
| H | -2.14208400 | -0.31449400 | -16.56963400 |
| H | -2.93819100 | -1.91759900 | -16.63096900 |
| H | -3.54508400 | -0.65963600 | -15.51117000 |
| C | -2.32854900 | -4.33440900 | -12.46894500 |
| H | -2.63653100 | -5.08349800 | -13.21443200 |
| H | -1.70789300 | -4.82925000 | -11.70482800 |
| H | -3.23031900 | -3.92843700 | -11.98281900 |
| C | 1.49328800  | -4.96930300 | -10.18583500 |
| C | 2.75883200  | -4.16401900 | -9.96573600  |
| H | 1.71297900  | -6.04173400 | -10.03316400 |
| H | 0.71710800  | -4.68698800 | -9.46117300  |
| O | 1.89496900  | -0.87934200 | -9.24644700  |
| C | 3.52210700  | -3.67516700 | -11.04516800 |
| C | 2.98511100  | -3.38979400 | -12.34765900 |
| H | 4.53414500  | -3.32131100 | -10.83058600 |
| C | 3.25883800  | -4.04769200 | -8.58200600  |
| C | 2.86282400  | -4.96455900 | -7.57667400  |
| C | 4.09626500  | -2.96846400 | -8.20638800  |
| C | 3.31693700  | -4.82469400 | -6.25776000  |
| H | 2.20911100  | -5.79913100 | -7.83058000  |
| C | 4.54916100  | -2.82962100 | -6.89030300  |
| H | 4.34400900  | -2.21198200 | -8.94509700  |
| C | 4.16302800  | -3.75834500 | -5.90747800  |
| H | 3.00674800  | -5.54893700 | -5.50156600  |
| H | 5.18155100  | -1.97938200 | -6.62532000  |
| H | 4.50599000  | -3.64403800 | -4.87711600  |
| H | 2.16698900  | -3.98363500 | -12.76536100 |
| H | 3.68154200  | -3.00189400 | -13.09499300 |
| H | 1.09372000  | -4.85214800 | -11.19988100 |
| C | 0.69552800  | -0.78846200 | -8.50138200  |
| C | 0.06306100  | -2.18073900 | -8.30333100  |
| C | 1.07702800  | -0.19104800 | -7.12678400  |
| C | -0.32199900 | 0.14955600  | -9.19486500  |
| H | -0.19685700 | -2.61286300 | -9.28207200  |
| H | 0.78289100  | -2.85084400 | -7.80864300  |
| H | -0.85406500 | -2.12679700 | -7.69116300  |
| H | 1.51720500  | 0.81066900  | -7.25784400  |
| H | 0.18831800  | -0.10054500 | -6.47837800  |
| H | 1.81386700  | -0.84283000 | -6.63060700  |

|    |             |             |              |
|----|-------------|-------------|--------------|
| H  | -1.25369400 | 0.22944300  | -8.60855000  |
| H  | 0.08905300  | 1.16781600  | -9.29832600  |
| H  | -0.57287200 | -0.22916700 | -10.19660500 |
| C  | 4.50049000  | 4.14285800  | -9.46132900  |
| H  | 4.95778200  | 4.46247300  | -8.51408600  |
| H  | 4.65718000  | 4.88815900  | -10.25386100 |
| C  | 4.83096800  | 2.76311500  | -9.85555000  |
| C  | 5.04471500  | 1.77053700  | -8.86472700  |
| C  | 4.68062800  | 2.34109700  | -11.20043000 |
| C  | 5.11850100  | 0.41284400  | -9.20551400  |
| H  | 5.13721000  | 2.07550000  | -7.82180300  |
| C  | 4.74926600  | 0.98109400  | -11.53926100 |
| H  | 4.49262700  | 3.08344600  | -11.97550300 |
| C  | 4.96116700  | 0.00880900  | -10.54466800 |
| H  | 5.27439300  | -0.32760100 | -8.42055200  |
| H  | 4.61759200  | 0.67634900  | -12.57472300 |
| H  | 4.98272300  | -1.04916700 | -10.81089700 |
| S  | 2.52006600  | 4.17407400  | -9.11600600  |
| O  | 1.96994500  | 3.69600400  | -10.47700800 |
| Na | 2.42811200  | 1.28156500  | -9.89301100  |
| O  | 2.36929400  | 3.04448900  | -8.07002200  |

**IM3a-endo**

|    |             |             |              |
|----|-------------|-------------|--------------|
| Pd | 1.76317900  | -2.05452500 | -10.98939600 |
| P  | 0.80178100  | -0.76743300 | -12.50238300 |
| O  | 1.51846400  | -0.77342000 | -14.02265200 |
| O  | 0.93814300  | 0.88388200  | -12.14505900 |
| C  | 2.75967400  | 1.28317600  | -14.24674400 |
| C  | 2.74462800  | -0.10873300 | -14.13580700 |
| C  | 3.92042500  | -0.89803400 | -14.15905600 |
| C  | 5.14918600  | -0.27953000 | -14.30222700 |
| C  | 6.51129700  | 1.79026100  | -14.45079500 |
| C  | 6.60368800  | 3.17294500  | -14.43804600 |
| C  | 5.42289000  | 3.96066400  | -14.35020100 |
| C  | 4.17299500  | 3.36121000  | -14.29948300 |
| C  | 4.03840100  | 1.94030100  | -14.32954700 |
| C  | 5.24282900  | 1.14028700  | -14.38236200 |
| C  | 1.47047000  | 2.02674800  | -14.20464400 |
| C  | 0.59945000  | 1.81372900  | -13.13697900 |
| C  | -0.63049900 | 2.49828700  | -12.99117000 |
| C  | -1.01796700 | 3.40304200  | -13.96064700 |
| C  | -0.62371000 | 4.52264500  | -16.14263800 |
| C  | 0.14718100  | 4.70900000  | -17.27980100 |
| C  | 1.36800700  | 3.99617800  | -17.43146800 |

|   |             |             |              |
|---|-------------|-------------|--------------|
| C | 1.80837700  | 3.12795100  | -16.44262600 |
| C | 1.05166100  | 2.92852500  | -15.24860800 |
| C | -0.20585300 | 3.63019600  | -15.11136900 |
| H | 3.83640200  | -1.97976200 | -14.06517500 |
| H | 6.06488200  | -0.87278900 | -14.32287000 |
| H | 7.40988500  | 1.17021700  | -14.49246400 |
| H | 7.57997900  | 3.65975100  | -14.48015300 |
| H | 5.50005700  | 5.04910800  | -14.31359200 |
| H | 3.27886400  | 3.97627000  | -14.21570900 |
| H | -1.23959100 | 2.30037700  | -12.11017500 |
| H | -1.95915600 | 3.94829500  | -13.86440700 |
| H | -1.57169900 | 5.05138200  | -16.01771200 |
| H | -0.18464200 | 5.39300800  | -18.06351700 |
| H | 1.96353400  | 4.12925700  | -18.33708200 |
| H | 2.74137700  | 2.58207900  | -16.57541000 |
| C | -1.58333400 | -2.03051000 | -12.12084400 |
| C | -1.47091700 | -0.59667200 | -14.12165300 |
| C | -2.12425700 | -3.16473600 | -13.00621600 |
| H | -2.43054500 | -1.47014500 | -11.68683900 |
| H | -0.97382300 | -2.44416600 | -11.30370300 |
| C | -2.02239300 | -1.77470900 | -14.94472600 |
| H | -2.30690000 | 0.04303300  | -13.79021500 |
| H | -0.78508300 | 0.00156100  | -14.73146300 |
| H | -1.25695600 | -3.73980700 | -13.39030600 |
| H | -1.16045800 | -2.36755700 | -15.31148400 |
| N | -0.76215400 | -1.11724800 | -12.93510700 |
| O | -2.84965600 | -2.61872900 | -14.12235800 |
| C | -2.87571600 | -1.28796200 | -16.11121800 |
| H | -2.26783000 | -0.66946200 | -16.79025900 |
| H | -3.27710400 | -2.14446600 | -16.67453200 |
| H | -3.71865400 | -0.68281400 | -15.74029600 |
| C | -3.07306500 | -4.07628100 | -12.23568100 |
| H | -3.47188200 | -4.85974000 | -12.89827300 |
| H | -2.53942300 | -4.55749700 | -11.40020400 |
| H | -3.91644000 | -3.49525500 | -11.82913500 |
| C | 3.34779800  | -4.01574900 | -8.70237000  |
| C | 3.32399700  | -3.85697600 | -10.20527000 |
| H | 4.21552300  | -4.61710400 | -8.38192500  |
| H | 3.43058300  | -3.02592300 | -8.22317300  |
| O | 1.95767600  | -0.73043900 | -9.35994900  |
| C | 2.17841600  | -4.24296700 | -10.92845300 |
| C | 1.86137800  | -3.78405300 | -12.25356000 |
| H | 1.38218100  | -4.73223600 | -10.35803500 |
| C | 4.59482300  | -3.44677900 | -10.85834900 |

|    |             |             |              |
|----|-------------|-------------|--------------|
| C  | 5.02224700  | -4.03735600 | -12.07272700 |
| C  | 5.44766500  | -2.50316600 | -10.23877000 |
| C  | 6.23906600  | -3.67041000 | -12.66275000 |
| H  | 4.40719100  | -4.80820800 | -12.53709000 |
| C  | 6.66120700  | -2.13147000 | -10.83338600 |
| H  | 5.14592500  | -2.04559600 | -9.29677600  |
| C  | 7.06115100  | -2.70789100 | -12.05096900 |
| H  | 6.55119200  | -4.14637200 | -13.59482900 |
| H  | 7.29428000  | -1.38822800 | -10.34460800 |
| H  | 8.00921700  | -2.42094900 | -12.51022600 |
| H  | 2.64291200  | -3.59165700 | -12.98897700 |
| H  | 0.90955300  | -4.11344000 | -12.67940600 |
| H  | 2.42262700  | -4.48674000 | -8.34077000  |
| C  | 0.86194100  | -0.67191800 | -8.45392100  |
| C  | 0.39278500  | -2.08451400 | -8.03503300  |
| C  | 1.35880500  | 0.08373700  | -7.19954400  |
| C  | -0.34292500 | 0.08813200  | -9.06351500  |
| H  | 0.02273600  | -2.63943900 | -8.91543100  |
| H  | 1.23022100  | -2.64695100 | -7.59629000  |
| H  | -0.42276300 | -2.02962900 | -7.29320900  |
| H  | 1.67797900  | 1.10244200  | -7.46531900  |
| H  | 0.55456000  | 0.16347000  | -6.44755000  |
| H  | 2.20905100  | -0.45533500 | -6.74993000  |
| H  | -1.20258200 | 0.07800500  | -8.37089700  |
| H  | -0.09956900 | 1.14377700  | -9.26058200  |
| H  | -0.65149700 | -0.39302700 | -10.00424700 |
| C  | 3.14058700  | 4.90329900  | -9.07690100  |
| H  | 3.13441700  | 5.26711400  | -8.03964400  |
| H  | 3.36369200  | 5.71449000  | -9.78461100  |
| C  | 3.93606400  | 3.68227200  | -9.28834400  |
| C  | 4.08033600  | 2.72896500  | -8.24830100  |
| C  | 4.33265300  | 3.30992600  | -10.59726500 |
| C  | 4.61913600  | 1.45919200  | -8.50405900  |
| H  | 3.75017700  | 2.98946000  | -7.24189400  |
| C  | 4.87184400  | 2.03983600  | -10.85196700 |
| H  | 4.20226200  | 4.01653700  | -11.41615600 |
| C  | 5.01391000  | 1.10841100  | -9.80811600  |
| H  | 4.70498600  | 0.73338900  | -7.69344200  |
| H  | 5.16726600  | 1.77195100  | -11.86509000 |
| H  | 5.40880700  | 0.11661300  | -10.01729300 |
| S  | 1.24215800  | 4.39250100  | -9.46826100  |
| O  | 1.37467200  | 3.80816500  | -10.88975000 |
| Na | 2.15104700  | 1.55038400  | -9.99136800  |
| O  | 1.02166800  | 3.24370200  | -8.45543700  |

**IM3b-exo**

|    |             |             |              |
|----|-------------|-------------|--------------|
| Pd | 1.86648400  | -1.86115000 | -10.69441900 |
| P  | 0.96920300  | -0.69906100 | -12.35470300 |
| O  | 1.71082300  | -0.64121200 | -13.86808600 |
| O  | 0.99641900  | 0.93713800  | -11.97551300 |
| C  | 2.74268100  | 1.53551800  | -14.10785900 |
| C  | 2.84955900  | 0.14333200  | -14.05503700 |
| C  | 4.07573500  | -0.53916700 | -14.25504700 |
| C  | 5.23331900  | 0.18640000  | -14.47381700 |
| C  | 6.41462800  | 2.36929000  | -14.56628800 |
| C  | 6.39666700  | 3.75142100  | -14.46688300 |
| C  | 5.16826700  | 4.42916000  | -14.23419700 |
| C  | 3.97877400  | 3.72355100  | -14.12673200 |
| C  | 3.95718400  | 2.30032600  | -14.24069200 |
| C  | 5.21213800  | 1.61167900  | -14.44334300 |
| C  | 1.40687000  | 2.18360300  | -13.99805200 |
| C  | 0.57984700  | 1.88344700  | -12.91869000 |
| C  | -0.68138700 | 2.48913600  | -12.70764600 |
| C  | -1.14778700 | 3.40728200  | -13.62917200 |
| C  | -0.89248400 | 4.61517600  | -15.78305600 |
| C  | -0.17548900 | 4.87938400  | -16.93954300 |
| C  | 1.07516400  | 4.23931200  | -17.15689600 |
| C  | 1.59894100  | 3.36766500  | -16.21294900 |
| C  | 0.89984700  | 3.09001400  | -14.99952500 |
| C  | -0.38891600 | 3.71550000  | -14.79720700 |
| H  | 4.07791000  | -1.62895500 | -14.24237600 |
| H  | 6.18403000  | -0.32479700 | -14.63767100 |
| H  | 7.35304000  | 1.83247200  | -14.72337600 |
| H  | 7.32404900  | 4.32105600  | -14.55231400 |
| H  | 5.16089700  | 5.51587500  | -14.12979600 |
| H  | 3.04849300  | 4.25321700  | -13.92996600 |
| H  | -1.25208800 | 2.22031100  | -11.81939200 |
| H  | -2.11366800 | 3.89527300  | -13.48378200 |
| H  | -1.86297200 | 5.08520500  | -15.60751500 |
| H  | -0.57233900 | 5.56778500  | -17.68826100 |
| H  | 1.62831200  | 4.43110000  | -18.07864100 |
| H  | 2.55369300  | 2.87876500  | -16.40007000 |
| C  | -1.18841100 | -2.35608200 | -12.30365900 |
| C  | -1.20721600 | -0.67023000 | -14.08606200 |
| C  | -1.14636700 | -3.45020800 | -13.38337200 |
| H  | -2.23694600 | -2.14220900 | -12.03533700 |
| H  | -0.65362900 | -2.68775500 | -11.40266000 |
| C  | -1.18298800 | -1.80949800 | -15.12013100 |

|   |             |             |              |
|---|-------------|-------------|--------------|
| H | -2.25153700 | -0.39243800 | -13.86568000 |
| H | -0.68267600 | 0.20530000  | -14.48157700 |
| H | -0.07992300 | -3.65610000 | -13.61312000 |
| H | -0.12425100 | -2.03410800 | -15.35299800 |
| N | -0.57959900 | -1.11234200 | -12.81824400 |
| O | -1.80121600 | -2.99199200 | -14.57972400 |
| C | -1.94052200 | -1.42870500 | -16.38740300 |
| H | -1.47028300 | -0.54993500 | -16.85662800 |
| H | -1.92788600 | -2.26330500 | -17.10538600 |
| H | -2.98820900 | -1.18459300 | -16.14833600 |
| C | -1.84911800 | -4.72455800 | -12.93213200 |
| H | -1.85091200 | -5.46656500 | -13.74536300 |
| H | -1.32720200 | -5.15337400 | -12.06394900 |
| H | -2.89166800 | -4.50869100 | -12.64811000 |
| C | 3.78505900  | -3.18259600 | -8.24018700  |
| C | 2.87589200  | -3.69022200 | -9.34754500  |
| H | 3.20868500  | -2.56512900 | -7.53349400  |
| H | 4.23729900  | -4.01389700 | -7.67219400  |
| O | 1.41872700  | -0.66899700 | -9.03700800  |
| C | 3.36676000  | -3.49408300 | -10.66450900 |
| C | 2.65609400  | -3.47812600 | -11.90455300 |
| H | 4.36916000  | -3.05790100 | -10.71247800 |
| C | 1.69754900  | -4.49566100 | -8.92192400  |
| C | 0.64081300  | -4.89452700 | -9.78400200  |
| C | 1.58571800  | -4.88282900 | -7.55877100  |
| C | -0.44814100 | -5.63601900 | -9.31247500  |
| H | 0.62478900  | -4.58333500 | -10.82187600 |
| C | 0.49592200  | -5.62784000 | -7.08855000  |
| H | 2.35578900  | -4.60141900 | -6.84396100  |
| C | -0.53252600 | -6.01076300 | -7.96140100  |
| H | -1.24574000 | -5.91082700 | -10.00516500 |
| H | 0.45308500  | -5.90189300 | -6.03237700  |
| H | -1.38723700 | -6.58416300 | -7.59732100  |
| H | 1.82880900  | -4.15003500 | -12.13645100 |
| H | 3.23913000  | -3.18577000 | -12.78047700 |
| H | 4.59725000  | -2.56840100 | -8.64878300  |
| C | 0.12787600  | -0.54523000 | -8.45846500  |
| C | -0.54384500 | -1.91959100 | -8.27627200  |
| C | 0.34321900  | 0.11540800  | -7.07605800  |
| C | -0.80158800 | 0.35946900  | -9.30387800  |
| H | -0.69341400 | -2.39836600 | -9.25578200  |
| H | 0.09399100  | -2.57947500 | -7.67041200  |
| H | -1.52647800 | -1.82229000 | -7.78268000  |
| H | 0.81074600  | 1.10555900  | -7.19649900  |

|    |             |             |              |
|----|-------------|-------------|--------------|
| H  | -0.61823500 | 0.24410600  | -6.54926900  |
| H  | 1.00229900  | -0.51684600 | -6.45853000  |
| H  | -1.78236900 | 0.47630500  | -8.81165300  |
| H  | -0.37508800 | 1.36847300  | -9.42568500  |
| H  | -0.96694200 | -0.07668700 | -10.30021000 |
| C  | 4.00942600  | 4.29747300  | -9.06309600  |
| H  | 4.26718700  | 4.64823600  | -8.05352400  |
| H  | 4.34476500  | 5.00815800  | -9.83183000  |
| C  | 4.38270200  | 2.89816700  | -9.33214100  |
| C  | 4.38446400  | 1.94110500  | -8.28410900  |
| C  | 4.47731100  | 2.42833100  | -10.66659200 |
| C  | 4.48543600  | 0.56919500  | -8.55836700  |
| H  | 4.28288200  | 2.28519300  | -7.25407100  |
| C  | 4.57479900  | 1.05541300  | -10.93898700 |
| H  | 4.45118900  | 3.14344300  | -11.48810500 |
| C  | 4.57324100  | 0.12023300  | -9.88877100  |
| H  | 4.46418100  | -0.15125200 | -7.73964600  |
| H  | 4.62843700  | 0.71157300  | -11.96939400 |
| H  | 4.61651700  | -0.94587100 | -10.10831300 |
| S  | 2.00248900  | 4.37501300  | -9.14048300  |
| O  | 1.73081700  | 3.82878500  | -10.55877100 |
| Na | 2.00726800  | 1.44178100  | -9.74391100  |
| O  | 1.61213400  | 3.30836600  | -8.08985200  |

**IM3b-endo**

|    |             |             |              |
|----|-------------|-------------|--------------|
| Pd | 1.78091900  | -2.03530300 | -11.04044100 |
| P  | 0.79979300  | -0.71926700 | -12.51425200 |
| O  | 1.52371300  | -0.61501000 | -14.02977600 |
| O  | 0.88385500  | 0.90852800  | -12.06632400 |
| C  | 2.65932300  | 1.51401400  | -14.14512100 |
| C  | 2.71286600  | 0.11871900  | -14.10834300 |
| C  | 3.92699300  | -0.60799100 | -14.17881600 |
| C  | 5.12355400  | 0.07900900  | -14.28609300 |
| C  | 6.38018100  | 2.22049900  | -14.31936500 |
| C  | 6.40153500  | 3.60428700  | -14.24816000 |
| C  | 5.18221300  | 4.32660700  | -14.12840900 |
| C  | 3.96472900  | 3.66246300  | -14.09938300 |
| C  | 3.90350300  | 2.23883300  | -14.19164400 |
| C  | 5.14629900  | 1.50482600  | -14.28278000 |
| C  | 1.33650500  | 2.19031400  | -14.05847200 |
| C  | 0.49124200  | 1.87903200  | -12.99531700 |
| C  | -0.76229400 | 2.50263700  | -12.79265500 |
| C  | -1.19908300 | 3.44896700  | -13.70034900 |
| C  | -0.88225700 | 4.70824800  | -15.81844400 |



|   |             |             |              |
|---|-------------|-------------|--------------|
| C | -0.13657000 | 4.99091800  | -16.95251700 |
| C | 1.10883500  | 4.33723600  | -17.16141600 |
| C | 1.59736400  | 3.43086500  | -16.23142900 |
| C | 0.86669500  | 3.13176600  | -15.04190800 |
| C | -0.41465400 | 3.77439300  | -14.84688700 |
| H | 3.89031600  | -1.69714900 | -14.15659100 |
| H | 6.06887800  | -0.46366200 | -14.35212300 |
| H | 7.30925900  | 1.64999000  | -14.38963800 |
| H | 7.35165400  | 4.14161400  | -14.26968800 |
| H | 5.20404500  | 5.41506700  | -14.04597100 |
| H | 3.04138600  | 4.22471200  | -13.97880500 |
| H | -1.35196300 | 2.22554300  | -11.91902400 |
| H | -2.15943300 | 3.94928000  | -13.55943600 |
| H | -1.84797100 | 5.19091400  | -15.65048700 |
| H | -0.50642500 | 5.70587900  | -17.69017100 |
| H | 1.68525000  | 4.54703000  | -18.06486100 |
| H | 2.54958300  | 2.93192500  | -16.40726700 |
| C | -1.52146700 | -2.12735900 | -12.26059700 |
| C | -1.45373800 | -0.55933500 | -14.15684900 |
| C | -1.88390300 | -3.25182400 | -13.24460500 |
| H | -2.44772900 | -1.68339900 | -11.85485600 |
| H | -0.92386600 | -2.52507100 | -11.42694500 |
| C | -1.82416200 | -1.72864400 | -15.08620900 |
| H | -2.37185700 | -0.04057000 | -13.83226100 |
| H | -0.80929400 | 0.15223400  | -14.68408100 |
| H | -0.93819500 | -3.70821200 | -13.60275900 |
| H | -0.88224100 | -2.19693500 | -15.43582100 |
| N | -0.75786100 | -1.07955000 | -12.96196000 |
| O | -2.59614500 | -2.71285800 | -14.37292300 |
| C | -2.66054900 | -1.25709700 | -16.27120800 |
| H | -2.08988100 | -0.52842500 | -16.86851300 |
| H | -2.92872800 | -2.11010800 | -16.91347300 |
| H | -3.58703700 | -0.77672400 | -15.91746000 |
| C | -2.77367400 | -4.30524100 | -12.59405000 |
| H | -3.03937500 | -5.08502300 | -13.32423200 |
| H | -2.24527300 | -4.77639400 | -11.74948000 |
| H | -3.70077400 | -3.84351000 | -12.21785700 |
| C | 4.63283800  | -3.16932700 | -10.78445500 |
| C | 3.35095600  | -3.75197700 | -10.19728300 |
| H | 4.63397300  | -2.06835100 | -10.77179800 |
| H | 5.50079300  | -3.51050400 | -10.19926800 |
| O | 1.89916300  | -0.77541700 | -9.37403200  |
| C | 2.29864300  | -4.19544100 | -11.02566400 |
| C | 2.10991500  | -3.71300300 | -12.36140800 |

|   |             |             |              |
|---|-------------|-------------|--------------|
| H | 1.47091600  | -4.73769800 | -10.56092700 |
| C | 3.30200700  | -3.96226400 | -8.73568300  |
| C | 3.96575600  | -3.04610000 | -7.88427500  |
| C | 2.57204000  | -5.02030700 | -8.14325600  |
| C | 3.88494800  | -3.17225300 | -6.49101800  |
| H | 4.51350500  | -2.21212900 | -8.32006500  |
| C | 2.49939400  | -5.14986400 | -6.75048900  |
| H | 2.07390500  | -5.75582400 | -8.77690700  |
| C | 3.15022200  | -4.22312000 | -5.91635200  |
| H | 4.39157700  | -2.44443800 | -5.85337300  |
| H | 1.93879300  | -5.97956800 | -6.31452600  |
| H | 3.08946300  | -4.32347400 | -4.83080200  |
| H | 2.96747100  | -3.44893800 | -12.98805600 |
| H | 1.23602300  | -4.06995700 | -12.91185200 |
| H | 4.76505900  | -3.48699200 | -11.82802000 |
| C | 0.79522100  | -0.70938600 | -8.48209300  |
| C | 0.30793800  | -2.12126500 | -8.09052000  |
| C | 1.29163800  | 0.02866400  | -7.21665200  |
| C | -0.38123700 | 0.08353300  | -9.10045700  |
| H | -0.03316100 | -2.66275400 | -8.99109500  |
| H | 1.12959700  | -2.69056700 | -7.63405300  |
| H | -0.53210000 | -2.07157400 | -7.37574200  |
| H | 1.63367400  | 1.04355700  | -7.47314100  |
| H | 0.47946400  | 0.11824700  | -6.47442000  |
| H | 2.12540500  | -0.52961600 | -6.76294400  |
| H | -1.23540200 | 0.12851000  | -8.40260100  |
| H | -0.08534900 | 1.11983600  | -9.32927700  |
| H | -0.71642700 | -0.40174200 | -10.03025800 |
| C | 3.70323200  | 4.60698700  | -9.23591700  |
| H | 3.76241400  | 5.06949200  | -8.24018900  |
| H | 4.04317900  | 5.30025200  | -10.01835600 |
| C | 4.31448000  | 3.26762800  | -9.31128000  |
| C | 4.30955900  | 2.41852100  | -8.17549800  |
| C | 4.68552400  | 2.71042400  | -10.56179000 |
| C | 4.70033300  | 1.07611700  | -8.27590000  |
| H | 3.99044600  | 2.82362900  | -7.21445900  |
| C | 5.07031200  | 1.36264600  | -10.66226600 |
| H | 4.66166900  | 3.33529400  | -11.45375300 |
| C | 5.08675600  | 0.54388000  | -9.51855100  |
| H | 4.68469600  | 0.43926500  | -7.38996400  |
| H | 5.34772400  | 0.95386500  | -11.63462600 |
| H | 5.39552600  | -0.49858500 | -9.59188500  |
| S | 1.74936700  | 4.36695500  | -9.59331300  |
| O | 1.78950500  | 3.70632100  | -10.98649000 |

|    |            |            |             |
|----|------------|------------|-------------|
| Na | 2.26014600 | 1.43340400 | -9.96430900 |
| O  | 1.36079800 | 3.31120600 | -8.52935100 |

**IM3a'-exo**

|    |             |             |              |
|----|-------------|-------------|--------------|
| Pd | 1.34342100  | -1.88438300 | -11.27136800 |
| P  | 1.46464800  | -0.92812000 | -9.20515300  |
| O  | 1.33454900  | -1.77836700 | -7.74654200  |
| O  | 0.15260800  | 0.12105400  | -9.00915300  |
| C  | -0.75856300 | -1.15156000 | -6.68498400  |
| C  | 0.10239700  | -2.12699500 | -7.19606800  |
| C  | -0.18840100 | -3.51308600 | -7.10806000  |
| C  | -1.39394100 | -3.93143500 | -6.57484100  |
| C  | -3.65507900 | -3.39457100 | -5.69753800  |
| C  | -4.61443100 | -2.46147100 | -5.33753800  |
| C  | -4.31812500 | -1.07316100 | -5.42226500  |
| C  | -3.06984800 | -0.63841100 | -5.84341000  |
| C  | -2.05349300 | -1.57178800 | -6.21149700  |
| C  | -2.36740000 | -2.98106900 | -6.15086900  |
| C  | -0.34051200 | 0.27649500  | -6.66202200  |
| C  | 0.08365000  | 0.88367400  | -7.84000900  |
| C  | 0.46413200  | 2.24442300  | -7.92217800  |
| C  | 0.44272900  | 3.01819900  | -6.77673500  |
| C  | 0.11346400  | 3.22678200  | -4.32482200  |
| C  | -0.19724800 | 2.66137600  | -3.09798400  |
| C  | -0.54671300 | 1.28532200  | -3.02195400  |
| C  | -0.60077300 | 0.50333500  | -4.16674400  |
| C  | -0.30803500 | 1.05687100  | -5.44995000  |
| C  | 0.07933800  | 2.44906700  | -5.52032200  |
| H  | 0.54902100  | -4.23114600 | -7.46336200  |
| H  | -1.62643700 | -4.99587100 | -6.50343700  |
| H  | -3.87213800 | -4.46448800 | -5.65626200  |
| H  | -5.60049200 | -2.78757400 | -5.00103600  |
| H  | -5.08306900 | -0.33950100 | -5.16038900  |
| H  | -2.86481000 | 0.42782600  | -5.91797800  |
| H  | 0.76466200  | 2.64988000  | -8.88740700  |
| H  | 0.72408700  | 4.07256600  | -6.81563200  |
| H  | 0.39933200  | 4.27866500  | -4.39895600  |
| H  | -0.16498600 | 3.26564700  | -2.18924800  |
| H  | -0.77079100 | 0.83676200  | -2.05190300  |
| H  | -0.86360600 | -0.55049700 | -4.09014500  |
| C  | 3.93113600  | 0.02424800  | -9.90121000  |
| C  | 3.29874400  | 0.40327500  | -7.55904000  |
| C  | 5.21522000  | -0.65802500 | -9.40648200  |
| H  | 4.12211400  | 1.09717500  | -10.08051400 |

|   |             |             |              |
|---|-------------|-------------|--------------|
| H | 3.59729500  | -0.43646300 | -10.84194100 |
| C | 4.60886900  | -0.28169800 | -7.13229900  |
| H | 3.46141000  | 1.49148200  | -7.64003100  |
| H | 2.51678500  | 0.21550100  | -6.81640000  |
| H | 4.99595100  | -1.72917400 | -9.26911300  |
| H | 4.40556400  | -1.36385100 | -7.02030000  |
| N | 2.87345300  | -0.10600700 | -8.88054500  |
| O | 5.62018600  | -0.09973500 | -8.14073200  |
| C | 5.14353300  | 0.30250000  | -5.82946000  |
| H | 4.41291600  | 0.14940700  | -5.01932400  |
| H | 6.08937000  | -0.18818700 | -5.55199000  |
| H | 5.32632700  | 1.38358700  | -5.94106800  |
| C | 6.36684200  | -0.47393900 | -10.38715100 |
| H | 7.27560100  | -0.96046300 | -10.00111700 |
| H | 6.10982300  | -0.92786000 | -11.35748400 |
| H | 6.57670600  | 0.59721300  | -10.54117900 |
| C | 1.28211900  | -4.84727800 | -10.56448900 |
| C | 2.41511700  | -3.90701000 | -10.96686400 |
| H | 1.68326700  | -5.86939400 | -10.44184300 |
| H | 0.83258000  | -4.54911400 | -9.60841200  |
| O | 0.15999400  | -0.39007900 | -12.16065300 |
| C | 2.53077300  | -3.39652400 | -12.29949100 |
| C | 1.41577400  | -3.11516500 | -13.11486400 |
| H | 3.48980300  | -2.97207600 | -12.60663600 |
| C | 3.64078900  | -3.97907100 | -10.11523800 |
| C | 4.94054000  | -4.04643100 | -10.67235800 |
| C | 3.52406000  | -4.03262900 | -8.70712000  |
| C | 6.07539300  | -4.13953600 | -9.85247500  |
| H | 5.07163900  | -4.05434000 | -11.75499800 |
| C | 4.65710400  | -4.11722400 | -7.88742700  |
| H | 2.53904800  | -3.97260300 | -8.25131400  |
| C | 5.94189400  | -4.16870700 | -8.45516900  |
| H | 7.06502500  | -4.19405700 | -10.31058100 |
| H | 4.53495200  | -4.13958000 | -6.80257700  |
| H | 6.82546800  | -4.23327100 | -7.81739600  |
| H | 0.47538600  | -3.66772700 | -13.04052000 |
| H | 1.57170000  | -2.55899100 | -14.03885300 |
| H | 0.48647500  | -4.87595400 | -11.31919200 |
| C | 0.74701800  | 0.75506000  | -12.75153200 |
| C | 2.00156900  | 0.39671400  | -13.57763300 |
| C | -0.32824600 | 1.35435400  | -13.68893800 |
| C | 1.11938300  | 1.80908600  | -11.68084900 |
| H | 2.76341100  | -0.06646600 | -12.92781200 |
| H | 1.73859800  | -0.32287600 | -14.36944100 |

|    |             |             |              |
|----|-------------|-------------|--------------|
| H  | 2.43953900  | 1.29385000  | -14.04803000 |
| H  | -1.22892000 | 1.62315900  | -13.11389600 |
| H  | 0.04873500  | 2.26205800  | -14.19125300 |
| H  | -0.60923700 | 0.61446900  | -14.45638300 |
| H  | 1.54221200  | 2.71817600  | -12.14286000 |
| H  | 0.22444900  | 2.10698500  | -11.10991300 |
| H  | 1.85784400  | 1.40275500  | -10.97469500 |
| C  | -5.06535000 | 0.27711300  | -10.35957400 |
| H  | -5.80082800 | 0.45052200  | -11.15808500 |
| H  | -5.54732400 | 0.24339800  | -9.37210600  |
| C  | -4.14567600 | -0.84478200 | -10.61798700 |
| C  | -3.74475800 | -1.15271600 | -11.94464400 |
| C  | -3.44484700 | -1.45863100 | -9.54960000  |
| C  | -2.68797200 | -2.04122900 | -12.19195000 |
| H  | -4.25598000 | -0.66788700 | -12.77699500 |
| C  | -2.39228600 | -2.35271800 | -9.79972500  |
| H  | -3.71748200 | -1.21613800 | -8.52269800  |
| C  | -2.00252400 | -2.64183500 | -11.11970200 |
| H  | -2.37766800 | -2.24135900 | -13.21890000 |
| H  | -1.86405800 | -2.80804200 | -8.96488600  |
| H  | -1.16165700 | -3.30969400 | -11.30930900 |
| S  | -3.94942800 | 1.94913400  | -10.32782500 |
| O  | -2.92342400 | 1.61699100  | -9.22154100  |
| Na | -1.56177700 | 0.22667300  | -10.80641500 |
| O  | -3.25846700 | 1.88285000  | -11.71016600 |

**IM3b<sup>2</sup>-endo**

|    |             |             |              |
|----|-------------|-------------|--------------|
| Pd | 1.72348000  | -1.86901900 | -11.58131800 |
| P  | 2.88299800  | -0.50767200 | -10.19152800 |
| O  | 2.92628400  | -0.73161400 | -8.52854200  |
| O  | 2.17600600  | 1.02987900  | -10.22345100 |
| C  | 1.44564600  | 0.87632000  | -7.49525500  |
| C  | 1.79205300  | -0.44934700 | -7.76622900  |
| C  | 1.08236700  | -1.55557900 | -7.23843600  |
| C  | -0.02168700 | -1.33333400 | -6.43549600  |
| C  | -1.67864600 | 0.22864200  | -5.44372300  |
| C  | -2.16251400 | 1.51487300  | -5.26407000  |
| C  | -1.46873400 | 2.61803900  | -5.83334800  |
| C  | -0.29711700 | 2.42419800  | -6.55058900  |
| C  | 0.24078100  | 1.11514500  | -6.73973900  |
| C  | -0.48500200 | -0.00751600 | -6.18807300  |
| C  | 2.30199100  | 1.98150100  | -8.00684400  |
| C  | 2.62603100  | 2.03351800  | -9.36185000  |
| C  | 3.38727600  | 3.07782400  | -9.93995300  |

|   |             |             |              |
|---|-------------|-------------|--------------|
| C | 3.86978800  | 4.08934300  | -9.13148600  |
| C | 4.18748100  | 5.07276400  | -6.87440700  |
| C | 4.00279000  | 5.02483400  | -5.50143900  |
| C | 3.26772400  | 3.95335100  | -4.92485300  |
| C | 2.71215300  | 2.96431900  | -5.72379700  |
| C | 2.86031200  | 2.99437000  | -7.14370600  |
| C | 3.64018800  | 4.06589100  | -7.72392900  |
| H | 1.43071600  | -2.55920900 | -7.46967200  |
| H | -0.57315000 | -2.17497800 | -6.01119800  |
| H | -2.21169100 | -0.63157600 | -5.03193900  |
| H | -3.08199800 | 1.68308600  | -4.69990500  |
| H | -1.86546200 | 3.62804300  | -5.71300600  |
| H | 0.21493700  | 3.27588700  | -6.99446800  |
| H | 3.56986500  | 3.06046800  | -11.01419000 |
| H | 4.44961600  | 4.91042200  | -9.55800200  |
| H | 4.76387100  | 5.87995800  | -7.33257500  |
| H | 4.42872000  | 5.79983600  | -4.86108400  |
| H | 3.14196600  | 3.90425300  | -3.84127100  |
| H | 2.15928900  | 2.14630500  | -5.26486100  |
| C | 5.16670400  | -0.96056000 | -11.63012000 |
| C | 5.46158500  | 0.39232200  | -9.59481600  |
| C | 6.39548800  | -1.78501400 | -11.21142600 |
| H | 5.48943400  | -0.15129900 | -12.30930400 |
| H | 4.44683000  | -1.59826200 | -12.16056300 |
| C | 6.68146300  | -0.47586300 | -9.24326900  |
| H | 5.79734000  | 1.28306400  | -10.15351000 |
| H | 4.95644400  | 0.71603000  | -8.67831200  |
| H | 6.04922100  | -2.62455000 | -10.57623000 |
| H | 6.32873700  | -1.33502000 | -8.63767100  |
| N | 4.52515600  | -0.38135800 | -10.43732500 |
| O | 7.30147600  | -0.97582500 | -10.44239600 |
| C | 7.73015800  | 0.32354000  | -8.47745100  |
| H | 7.30471800  | 0.69297000  | -7.53101500  |
| H | 8.60267600  | -0.30867100 | -8.25174400  |
| H | 8.06450100  | 1.18649800  | -9.07551800  |
| C | 7.15147900  | -2.31324600 | -12.42517200 |
| H | 8.04213600  | -2.87522400 | -12.10509800 |
| H | 6.50230000  | -2.98209500 | -13.01254100 |
| H | 7.47281000  | -1.47842500 | -13.06868000 |
| C | 3.51727100  | -4.30894600 | -11.66879500 |
| C | 2.31070900  | -3.96216900 | -10.80115500 |
| H | 4.43497800  | -3.85512700 | -11.27437300 |
| H | 3.65940800  | -5.40546400 | -11.65439500 |
| O | 0.96796100  | -0.40043800 | -12.88345400 |

|   |             |             |              |
|---|-------------|-------------|--------------|
| C | 0.99049000  | -3.91970300 | -11.34528900 |
| C | 0.73434100  | -3.53482900 | -12.67874000 |
| H | 0.15059800  | -3.94258900 | -10.64595000 |
| C | 2.49246300  | -4.21818200 | -9.34246500  |
| C | 3.64827300  | -3.74818700 | -8.67943100  |
| C | 1.55132400  | -4.96427500 | -8.59515500  |
| C | 3.85257100  | -3.99885600 | -7.31746800  |
| H | 4.36802900  | -3.14251900 | -9.22916300  |
| C | 1.75703800  | -5.22004900 | -7.23026700  |
| H | 0.66522800  | -5.36791100 | -9.08732300  |
| C | 2.90755700  | -4.73746900 | -6.58460000  |
| H | 4.74425100  | -3.60530800 | -6.82492900  |
| H | 1.01944700  | -5.80304300 | -6.67479900  |
| H | 3.06533000  | -4.93310100 | -5.52216300  |
| H | 1.44050400  | -3.73422900 | -13.48752600 |
| H | -0.29455000 | -3.33379100 | -12.97924600 |
| H | 3.39355000  | -3.98813400 | -12.71113200 |
| C | 1.74623000  | 0.11035200  | -13.94943600 |
| C | 2.52565800  | -1.01126000 | -14.67055000 |
| C | 0.74776400  | 0.75778400  | -14.93858500 |
| C | 2.73477300  | 1.19297200  | -13.45481600 |
| H | 3.23508400  | -1.48765200 | -13.97267400 |
| H | 1.82492600  | -1.78055000 | -15.03322100 |
| H | 3.09473000  | -0.61777900 | -15.53067600 |
| H | 0.18127900  | 1.55516000  | -14.43207000 |
| H | 1.27764600  | 1.19489600  | -15.80263000 |
| H | 0.03789700  | -0.00179500 | -15.30589700 |
| H | 3.32389900  | 1.61090200  | -14.28950400 |
| H | 2.18585200  | 2.02175900  | -12.97784800 |
| H | 3.43054100  | 0.76898700  | -12.71754400 |
| C | -2.89500400 | 3.00312800  | -10.90391700 |
| H | -3.65431100 | 3.25033800  | -11.65954200 |
| H | -3.12035800 | 3.47972500  | -9.93920600  |
| C | -2.58489700 | 1.56598100  | -10.80670600 |
| C | -2.66121700 | 0.73594600  | -11.95574900 |
| C | -1.95532600 | 1.04541600  | -9.64754900  |
| C | -2.13597200 | -0.56444400 | -11.94470200 |
| H | -3.11670100 | 1.13206300  | -12.86420300 |
| C | -1.43193200 | -0.25694700 | -9.63834700  |
| H | -1.86068800 | 1.67372400  | -8.76209400  |
| C | -1.51461400 | -1.06579600 | -10.78622300 |
| H | -2.18159800 | -1.17495100 | -12.84769100 |
| H | -0.94258500 | -0.63559600 | -8.74342800  |
| H | -1.07516500 | -2.06298400 | -10.78442700 |

|    |             |            |              |
|----|-------------|------------|--------------|
| S  | -1.21966400 | 3.91395900 | -11.54120800 |
| O  | -0.20571500 | 3.47703800 | -10.46102100 |
| Na | 0.09682000  | 1.23091700 | -11.55910000 |
| O  | -0.93501700 | 3.15382100 | -12.85756900 |

**E-TS3a**

|    |             |             |             |
|----|-------------|-------------|-------------|
| C  | -1.09741400 | -0.05406800 | -5.27247400 |
| C  | -0.60349600 | 0.87946600  | -4.16759300 |
| H  | -0.93392900 | -1.10442300 | -4.98537600 |
| H  | -2.17575000 | 0.08527400  | -5.43710300 |
| C  | -1.06361900 | 2.27118900  | -4.16727100 |
| C  | -1.81615000 | 2.86709700  | -5.22641600 |
| H  | -0.47566700 | 2.99390100  | -3.59110500 |
| C  | 0.81422300  | 0.69535000  | -3.73555400 |
| C  | 1.72444300  | -0.08091300 | -4.49947200 |
| C  | 1.34862600  | 1.44695900  | -2.65253200 |
| C  | 3.11020600  | -0.03079600 | -4.25340600 |
| H  | 1.35771900  | -0.68406900 | -5.32872800 |
| C  | 2.72762100  | 1.50572200  | -2.41380300 |
| H  | 0.66484000  | 1.99592000  | -2.00521000 |
| C  | 3.62499000  | 0.78435000  | -3.22979100 |
| H  | 3.78602400  | -0.61936500 | -4.87769300 |
| H  | 3.10235100  | 2.10391500  | -1.58343400 |
| H  | 4.69962000  | 0.83241700  | -3.04535900 |
| O  | -3.59205700 | 1.84947800  | -1.35593800 |
| H  | -2.37237900 | 2.23016600  | -5.91862100 |
| H  | -2.27462000 | 3.84233500  | -5.03677700 |
| H  | -0.57670400 | 0.13520400  | -6.22778200 |
| C  | -4.34455000 | 2.93082000  | -1.83511800 |
| C  | -5.46387700 | 3.21812800  | -0.80250400 |
| C  | -3.46342000 | 4.19791400  | -1.99266200 |
| C  | -5.00316700 | 2.60566800  | -3.20198800 |
| H  | -6.11054000 | 2.33105600  | -0.69599300 |
| H  | -5.01601400 | 3.43958700  | 0.18094900  |
| H  | -6.09157200 | 4.07641100  | -1.10291000 |
| H  | -2.63949800 | 3.98336500  | -2.69264300 |
| H  | -4.03488200 | 5.06485200  | -2.37313100 |
| H  | -3.02522600 | 4.47270000  | -1.01742900 |
| H  | -5.62701100 | 3.43893800  | -3.57559400 |
| H  | -4.21810500 | 2.39141200  | -3.94702800 |
| H  | -5.63817900 | 1.70930700  | -3.10379000 |
| Pd | -2.06005000 | 1.05830200  | -2.63665600 |
| P  | -1.84749100 | -0.73730400 | -1.35282600 |
| O  | -1.68447400 | -0.33170400 | 0.28750800  |



|   |             |             |             |
|---|-------------|-------------|-------------|
| O | -0.37612500 | -1.58488300 | -1.51961600 |
| C | 0.66419600  | -0.01550700 | 0.64711200  |
| C | -0.60692900 | 0.53289600  | 0.47370900  |
| C | -0.86100200 | 1.92799300  | 0.43782300  |
| C | 0.19493800  | 2.80298400  | 0.61836800  |
| C | 2.62618300  | 3.21740800  | 0.90825000  |
| C | 3.92911200  | 2.74881100  | 0.99361100  |
| C | 4.18059800  | 1.35030200  | 0.94639400  |
| C | 3.13266300  | 0.44698000  | 0.83816800  |
| C | 1.77757100  | 0.89113900  | 0.77920900  |
| C | 1.52642500  | 2.31634400  | 0.78773600  |
| C | 0.80626700  | -1.49728100 | 0.60917100  |
| C | 0.26978100  | -2.21879700 | -0.46828500 |
| C | 0.41676900  | -3.62771000 | -0.58012400 |
| C | 1.08166100  | -4.33579800 | 0.40296700  |
| C | 2.22277100  | -4.39937600 | 2.60821200  |
| C | 2.66594200  | -3.75732700 | 3.75413400  |
| C | 2.47689600  | -2.35499900 | 3.89399900  |
| C | 1.87549500  | -1.61674600 | 2.88486700  |
| C | 1.43204400  | -2.23852500 | 1.67734500  |
| C | 1.58917200  | -3.67129600 | 1.55763900  |
| H | -1.87886500 | 2.25235000  | 0.20934100  |
| H | 0.02913200  | 3.88279300  | 0.59874100  |
| H | 2.41759700  | 4.29006600  | 0.92114600  |
| H | 4.76140100  | 3.45002500  | 1.08347100  |
| H | 5.20810200  | 0.98271600  | 0.98621600  |
| H | 3.34128900  | -0.62029500 | 0.78757500  |
| H | -0.00510200 | -4.12363600 | -1.45512100 |
| H | 1.20691000  | -5.41750000 | 0.31781100  |
| H | 2.34001000  | -5.47966000 | 2.49234300  |
| H | 3.14565900  | -4.32508600 | 4.55398200  |
| H | 2.80188600  | -1.85312300 | 4.80788100  |
| H | 1.72948300  | -0.54528600 | 3.01227800  |
| C | -4.31686500 | -1.64949600 | -1.97391000 |
| C | -3.19593000 | -2.84299300 | -0.14482400 |
| C | -5.36018900 | -1.13904800 | -0.96784900 |
| H | -4.66950500 | -2.59182300 | -2.42960800 |
| H | -4.15738300 | -0.90110600 | -2.76486600 |
| C | -4.27803200 | -2.31173900 | 0.81694200  |
| H | -3.50739100 | -3.82812800 | -0.53452700 |
| H | -2.23969500 | -2.95624200 | 0.38163200  |
| H | -4.98488100 | -0.17751300 | -0.57093800 |
| H | -3.92212700 | -1.34849800 | 1.22793200  |
| N | -3.03416900 | -1.92297600 | -1.29076500 |

|    |             |             |              |
|----|-------------|-------------|--------------|
| O  | -5.51059200 | -2.09191700 | 0.10762400   |
| C  | -4.56506500 | -3.29984700 | 1.94320800   |
| H  | -3.65421500 | -3.46623000 | 2.54048100   |
| H  | -5.35420300 | -2.90816700 | 2.60403800   |
| H  | -4.89955800 | -4.26567700 | 1.52998800   |
| C  | -6.73097800 | -0.95542000 | -1.60878700  |
| H  | -7.46114200 | -0.61158100 | -0.85923800  |
| H  | -6.67095000 | -0.20444700 | -2.41197200  |
| H  | -7.08842400 | -1.90659700 | -2.03736200  |
| C  | -0.59891600 | 4.54447600  | -8.11851000  |
| H  | 0.36772200  | 4.71661200  | -8.61514800  |
| H  | -1.00970700 | 5.49159400  | -7.74039700  |
| C  | -1.57228500 | 3.76323600  | -8.94488300  |
| C  | -1.12101600 | 2.89056300  | -9.95661200  |
| C  | -2.95316400 | 3.82779700  | -8.65920000  |
| C  | -2.03487300 | 2.10861200  | -10.67907100 |
| H  | -0.05272800 | 2.83071300  | -10.17416600 |
| C  | -3.86667700 | 3.04284000  | -9.37864500  |
| H  | -3.30687900 | 4.49936600  | -7.87297300  |
| C  | -3.40906000 | 2.18111900  | -10.39093200 |
| H  | -1.67499000 | 1.44134400  | -11.46507800 |
| H  | -4.93301500 | 3.10474800  | -9.15149200  |
| H  | -4.11922600 | 1.57105400  | -10.95297700 |
| S  | -0.16004200 | 3.56292000  | -6.55361600  |
| O  | 0.69910300  | 4.47737400  | -5.68546400  |
| Na | 2.18176400  | 2.56832000  | -5.04105000  |
| O  | 0.61787300  | 2.33584400  | -7.00711100  |

***E-TS3b***

|    |             |             |              |
|----|-------------|-------------|--------------|
| Pd | 2.89527900  | -2.49390800 | -11.72385800 |
| P  | 3.31680100  | -1.38290500 | -9.83528900  |
| O  | 4.43349600  | -0.10233900 | -10.00009500 |
| O  | 4.19909200  | -2.31480600 | -8.71188000  |
| C  | 6.59815300  | -1.09133800 | -9.65726500  |
| C  | 5.65079600  | -0.53279100 | -10.51830200 |
| C  | 5.86379000  | -0.39760600 | -11.91423400 |
| C  | 7.05308900  | -0.83695200 | -12.46600200 |
| C  | 9.23175000  | -2.00410100 | -12.22922500 |
| C  | 10.15600700 | -2.68552000 | -11.45220500 |
| C  | 9.91393700  | -2.86623000 | -10.06290100 |
| C  | 8.77177100  | -2.34715800 | -9.46970100  |
| C  | 7.80967200  | -1.61986100 | -10.23383300 |
| C  | 8.03975600  | -1.47171400 | -11.65436300 |
| C  | 6.28419700  | -1.18328200 | -8.20440800  |

|   |             |             |              |
|---|-------------|-------------|--------------|
| C | 5.08756900  | -1.78438400 | -7.79194100  |
| C | 4.75715800  | -1.95122200 | -6.42005300  |
| C | 5.61774900  | -1.49044800 | -5.44210600  |
| C | 7.69059600  | -0.28550900 | -4.79401900  |
| C | 8.83648000  | 0.41364500  | -5.14039700  |
| C | 9.14655500  | 0.62322700  | -6.51202000  |
| C | 8.32695100  | 0.11557600  | -7.50994200  |
| C | 7.15336100  | -0.63442800 | -7.19187200  |
| C | 6.82144300  | -0.81190000 | -5.79516000  |
| H | 5.07487600  | 0.04621400  | -12.52094700 |
| H | 7.23876000  | -0.73409800 | -13.53748300 |
| H | 9.39216300  | -1.87461300 | -13.30235100 |
| H | 11.06137200 | -3.09460600 | -11.90515800 |
| H | 10.63099000 | -3.42361600 | -9.45643800  |
| H | 8.59582600  | -2.50093800 | -8.40611300  |
| H | 3.81952000  | -2.44888100 | -6.16993600  |
| H | 5.37696700  | -1.62311200 | -4.38498000  |
| H | 7.42516200  | -0.43882000 | -3.74508200  |
| H | 9.49297100  | 0.81487100  | -4.36562100  |
| H | 10.03547200 | 1.19600000  | -6.78462700  |
| H | 8.57392900  | 0.29477000  | -8.55523500  |
| C | 0.75253100  | -0.54394700 | -9.48264300  |
| C | 2.38241300  | 0.35867200  | -7.87536700  |
| C | 0.45121100  | 0.89383800  | -9.93080100  |
| H | 0.04401100  | -0.83833900 | -8.68685100  |
| H | 0.65494900  | -1.21382900 | -10.34676000 |
| C | 2.03173900  | 1.77514200  | -8.37220400  |
| H | 1.74876500  | 0.11199000  | -7.00478800  |
| H | 3.43518400  | 0.31688100  | -7.57093300  |
| H | 1.14277900  | 1.13053400  | -10.76034100 |
| H | 2.71253700  | 2.01485800  | -9.21255400  |
| N | 2.12267800  | -0.63088000 | -8.93918400  |
| O | 0.67417500  | 1.81764300  | -8.84293700  |
| C | 2.16978500  | 2.81099400  | -7.26082700  |
| H | 3.21048600  | 2.84165200  | -6.90035400  |
| H | 1.89442600  | 3.81029000  | -7.63278400  |
| H | 1.50950200  | 2.55615500  | -6.41561600  |
| C | -0.99537900 | 1.05212600  | -10.38313600 |
| H | -1.19179100 | 2.09195200  | -10.68875400 |
| H | -1.18745500 | 0.38890300  | -11.24020800 |
| H | -1.68641500 | 0.78956200  | -9.56480100  |
| C | 5.52221600  | -4.02149700 | -11.48731200 |
| C | 4.02013200  | -4.29264900 | -11.52247400 |
| H | 5.80102700  | -3.59600300 | -10.51619900 |

|   |             |              |              |
|---|-------------|--------------|--------------|
| H | 6.12999200  | -4.93415200  | -11.64620700 |
| O | 1.57213500  | -1.00052400  | -12.46756900 |
| C | 3.32563900  | -4.35005100  | -12.81104200 |
| C | 3.92744100  | -4.08484700  | -14.09213700 |
| H | 2.40070400  | -4.92966000  | -12.86591600 |
| C | 3.49788500  | -5.17354300  | -10.42510700 |
| C | 2.11576500  | -5.49291700  | -10.32262400 |
| C | 4.37572700  | -5.79135300  | -9.49331300  |
| C | 1.64098300  | -6.37548600  | -9.34665500  |
| H | 1.41002600  | -5.00884200  | -10.99853200 |
| C | 3.89540000  | -6.68253300  | -8.51482100  |
| H | 5.44221400  | -5.56478500  | -9.51732200  |
| C | 2.52818300  | -6.98278100  | -8.43558800  |
| H | 0.57070200  | -6.58645000  | -9.29041000  |
| H | 4.59936300  | -7.13163900  | -7.81050400  |
| H | 2.15412700  | -7.66889500  | -7.67333400  |
| H | 4.84645500  | -3.49539600  | -14.13758700 |
| H | 3.23709300  | -3.89721500  | -14.91957200 |
| H | 5.81108100  | -3.30102800  | -12.25990600 |
| C | 1.32904300  | -0.92111200  | -13.84418600 |
| C | 0.39370000  | 0.29115300   | -14.08791500 |
| C | 2.64375000  | -0.70004800  | -14.63598300 |
| C | 0.63094100  | -2.20523200  | -14.36459900 |
| H | -0.55113800 | 0.15411900   | -13.53650500 |
| H | 0.87583800  | 1.21411400   | -13.72443000 |
| H | 0.15802300  | 0.41644300   | -15.16007400 |
| H | 3.33359700  | -1.53497000  | -14.43304600 |
| H | 2.47268400  | -0.63510800  | -15.72650600 |
| H | 3.12590300  | 0.23463400   | -14.30158500 |
| H | 0.43227400  | -2.16795300  | -15.45164700 |
| H | 1.26688500  | -3.07859300  | -14.14903800 |
| H | -0.32981800 | -2.34249100  | -13.83864600 |
| C | 5.09784100  | -6.38304000  | -16.54921900 |
| H | 5.83969400  | -5.61840700  | -16.82109000 |
| H | 4.14499700  | -6.19231300  | -17.06377400 |
| C | 5.59689200  | -7.78048200  | -16.71464300 |
| C | 6.97494700  | -8.06334000  | -16.59871600 |
| C | 4.69039700  | -8.84429600  | -16.91274600 |
| C | 7.43954100  | -9.38309700  | -16.69821500 |
| H | 7.67687500  | -7.24317800  | -16.43630400 |
| C | 5.15587500  | -10.16359200 | -17.01202000 |
| H | 3.62328700  | -8.62927900  | -16.99359600 |
| C | 6.53135500  | -10.43674300 | -16.90432400 |
| H | 8.50884100  | -9.58967800  | -16.61629800 |

|    |            |              |              |
|----|------------|--------------|--------------|
| H  | 4.44682200 | -10.97814800 | -17.17476500 |
| H  | 6.89343600 | -11.46397100 | -16.98389900 |
| S  | 4.71249600 | -6.03370500  | -14.71273300 |
| O  | 5.99613300 | -6.26558300  | -13.92851400 |
| Na | 4.55227500 | -6.98770100  | -11.99696100 |
| O  | 3.61738300 | -7.01047000  | -14.30823700 |

**(R)-TS4**

|    |             |             |             |
|----|-------------|-------------|-------------|
| C  | -1.19621700 | 1.28639200  | -2.51916200 |
| C  | -2.37046600 | 1.77139100  | -3.21099600 |
| C  | -2.44387100 | 3.05530200  | -3.90505400 |
| H  | -3.15150700 | 1.05859800  | -3.49393800 |
| O  | -2.10887900 | 1.86430600  | 0.94569600  |
| C  | -0.77412500 | 1.66722300  | 1.32351100  |
| C  | -0.71737100 | 1.74427200  | 2.87153600  |
| C  | -0.26128100 | 0.27743500  | 0.87016000  |
| C  | 0.14886300  | 2.76333200  | 0.73219400  |
| H  | -1.06556600 | 2.73447200  | 3.21060200  |
| H  | -1.37590400 | 0.97541700  | 3.30946400  |
| H  | 0.30825200  | 1.58533400  | 3.24944800  |
| H  | -0.32466700 | 0.21073300  | -0.22717100 |
| H  | 0.78489100  | 0.09879800  | 1.17877800  |
| H  | -0.89356400 | -0.51570600 | 1.30488800  |
| H  | 1.20436600  | 2.63176000  | 1.03398000  |
| H  | 0.08585900  | 2.73300300  | -0.36845800 |
| H  | -0.19080200 | 3.75773000  | 1.06987100  |
| Pd | -2.63367700 | 2.01312100  | -1.10521500 |
| P  | -4.85117100 | 2.15278800  | -0.71091200 |
| O  | -5.42844100 | 0.53926000  | -0.41806600 |
| O  | -5.77562200 | 2.45104800  | -2.09864300 |
| C  | -5.22398900 | -0.42697500 | -2.60769800 |
| C  | -4.79683300 | -0.33788300 | -1.27911400 |
| C  | -3.69157200 | -1.07774000 | -0.77586200 |
| C  | -2.99837400 | -1.93576900 | -1.60524800 |
| C  | -2.57553700 | -2.84441200 | -3.88197700 |
| C  | -2.82769700 | -2.84036800 | -5.25095400 |
| C  | -3.84402000 | -1.99065600 | -5.77634500 |
| C  | -4.62240300 | -1.21056100 | -4.92738200 |
| C  | -4.42148500 | -1.21927100 | -3.51257300 |
| C  | -3.33093700 | -2.01869000 | -2.99052700 |
| C  | -6.46579300 | 0.27841300  | -3.02684900 |
| C  | -6.68802000 | 1.63302900  | -2.72688100 |
| C  | -7.86208900 | 2.31279500  | -3.15849200 |
| C  | -8.83196500 | 1.65055700  | -3.88047900 |

|   |              |             |             |
|---|--------------|-------------|-------------|
| C | -9.72906800  | -0.44700200 | -4.85145100 |
| C | -9.63847600  | -1.81396700 | -5.06335000 |
| C | -8.51618000  | -2.52508500 | -4.56126600 |
| C | -7.49434700  | -1.86289700 | -3.89431700 |
| C | -7.52821000  | -0.44755600 | -3.69607800 |
| C | -8.70204500  | 0.25865900  | -4.15838300 |
| H | -3.41021300  | -0.93323800 | 0.26593700  |
| H | -2.16062800  | -2.52362900 | -1.22568300 |
| H | -1.77737400  | -3.46215200 | -3.46440400 |
| H | -2.23706400  | -3.46563800 | -5.92240000 |
| H | -4.01324500  | -1.95044300 | -6.85343600 |
| H | -5.40261600  | -0.57404700 | -5.34064200 |
| H | -7.95124200  | 3.37340300  | -2.92384300 |
| H | -9.72103700  | 2.17992000  | -4.23007500 |
| H | -10.59864400 | 0.11611100  | -5.19898900 |
| H | -10.43207100 | -2.34577000 | -5.59185300 |
| H | -8.45835900  | -3.60795400 | -4.69017400 |
| H | -6.66020000  | -2.44010100 | -3.50008300 |
| C | -4.94164200  | 3.46568300  | 1.63910000  |
| C | -7.14338700  | 2.94438800  | 0.65685300  |
| C | -5.31081200  | 2.57077700  | 2.83426300  |
| H | -5.21561800  | 4.51071900  | 1.86945600  |
| H | -3.86012600  | 3.39055000  | 1.44660100  |
| C | -7.44433000  | 2.06365900  | 1.88533300  |
| H | -7.53633100  | 3.96038500  | 0.83919500  |
| H | -7.62852000  | 2.53324000  | -0.23867300 |
| H | -4.97696100  | 1.54039700  | 2.60082700  |
| H | -7.09054600  | 1.03818700  | 1.66481800  |
| N | -5.68899000  | 3.04539400  | 0.43278300  |
| O | -6.73902300  | 2.56384000  | 3.03563500  |
| C | -8.93181700  | 2.05546400  | 2.22235500  |
| H | -9.50688100  | 1.63803800  | 1.38027600  |
| H | -9.11864100  | 1.44129900  | 3.11705700  |
| H | -9.28562500  | 3.08084300  | 2.41895700  |
| C | -4.66401500  | 3.05780200  | 4.12608400  |
| H | -4.96957700  | 2.42166200  | 4.97154700  |
| H | -3.56766000  | 3.01878900  | 4.03087000  |
| H | -4.96659300  | 4.09631300  | 4.33923300  |
| C | -1.92730800  | 3.69619400  | -7.28096500 |
| H | -1.67564000  | 4.71990200  | -6.97010500 |
| H | -3.01390400  | 3.54723100  | -7.24796100 |
| C | -1.32051800  | 3.30749500  | -8.58953600 |
| C | -0.06742400  | 3.82521300  | -8.98113500 |
| C | -1.96209100  | 2.36282100  | -9.41868700 |

|    |             |             |              |
|----|-------------|-------------|--------------|
| C  | 0.52443000  | 3.41778000  | -10.18593400 |
| H  | 0.43671200  | 4.54723300  | -8.33619500  |
| C  | -1.37071700 | 1.95644700  | -10.62409000 |
| H  | -2.93008200 | 1.95824700  | -9.11519600  |
| C  | -0.12501000 | 2.48218100  | -11.01060600 |
| H  | 1.49162800  | 3.82999300  | -10.48196300 |
| H  | -1.88087800 | 1.23139100  | -11.26228700 |
| H  | 0.33529600  | 2.16672900  | -11.94947000 |
| S  | -1.24363700 | 2.60588000  | -5.87800200  |
| O  | 0.23011400  | 2.89340600  | -5.76341700  |
| Na | -1.79583100 | -0.36780900 | -4.67353600  |
| O  | -1.60418100 | 1.17918900  | -6.30263600  |
| H  | -1.08502000 | 0.20473400  | -2.36384100  |
| H  | -0.24883800 | 1.82448100  | -2.60092000  |
| C  | -3.75601100 | 3.41986600  | -4.51939100  |
| C  | -4.24700800 | 4.74371300  | -4.47111200  |
| C  | -4.51900100 | 2.45184000  | -5.21575600  |
| C  | -5.45974600 | 5.08379200  | -5.08926700  |
| H  | -3.69059200 | 5.51074000  | -3.93328000  |
| C  | -5.72011300 | 2.79307500  | -5.84528100  |
| H  | -4.14921200 | 1.43213000  | -5.30231100  |
| C  | -6.19877300 | 4.11348900  | -5.78475800  |
| H  | -5.82421700 | 6.11140800  | -5.02873200  |
| H  | -6.28615600 | 2.02740200  | -6.37915100  |
| H  | -7.13915800 | 4.38027600  | -6.27110900  |
| C  | -1.56490700 | 4.18716500  | -3.39904700  |
| H  | -0.54352000 | 3.83757200  | -3.20637500  |
| H  | -1.51923300 | 5.01588800  | -4.12064600  |
| H  | -1.98164400 | 4.56653800  | -2.45094400  |

**(S)-TS4**

|   |             |             |             |
|---|-------------|-------------|-------------|
| C | -0.55982300 | 2.50655000  | -2.05073100 |
| C | -1.50674000 | 2.97718800  | -3.04328400 |
| C | -1.35185800 | 2.79117900  | -4.50610000 |
| H | -2.15101500 | 3.81104100  | -2.75354700 |
| O | -2.12938000 | -0.48459200 | -0.76985100 |
| C | -1.22459400 | -0.48483700 | 0.29767800  |
| C | -1.51984600 | -1.74093600 | 1.15904800  |
| C | 0.24000800  | -0.55403300 | -0.20519800 |
| C | -1.39278100 | 0.77597200  | 1.18350300  |
| H | -2.55079300 | -1.69662700 | 1.54672200  |
| H | -1.42194400 | -2.64917900 | 0.54045600  |
| H | -0.82620200 | -1.82369700 | 2.01522400  |
| H | 0.44797600  | 0.32406400  | -0.83668500 |

|    |             |             |             |
|----|-------------|-------------|-------------|
| H  | 0.97049300  | -0.57654100 | 0.62489200  |
| H  | 0.38147200  | -1.46102200 | -0.81797400 |
| H  | -0.69565900 | 0.78408400  | 2.04204800  |
| H  | -1.21421500 | 1.67389100  | 0.56951300  |
| H  | -2.42393400 | 0.82496400  | 1.57094100  |
| Pd | -2.22620500 | 1.18102500  | -2.13225900 |
| P  | -4.17620500 | 0.33450400  | -2.87042900 |
| O  | -4.07648200 | -1.30272900 | -3.33883800 |
| O  | -4.76201900 | 0.94816700  | -4.34645000 |
| C  | -3.33074000 | -1.22388500 | -5.61706500 |
| C  | -3.05634200 | -1.46696100 | -4.26957200 |
| C  | -1.77463900 | -1.84399400 | -3.78999900 |
| C  | -0.73921500 | -2.00343200 | -4.69222000 |
| C  | 0.15621300  | -1.79236500 | -6.99858400 |
| C  | -0.00662600 | -1.43146300 | -8.32756100 |
| C  | -1.27510500 | -0.98279600 | -8.78633400 |
| C  | -2.35979700 | -0.92614700 | -7.92222200 |
| C  | -2.23456400 | -1.30805600 | -6.55187200 |
| C  | -0.93282100 | -1.72734400 | -6.07924000 |
| C  | -4.71301500 | -0.83506700 | -6.01000600 |
| C  | -5.36504400 | 0.21877300  | -5.35070600 |
| C  | -6.65662300 | 0.66677500  | -5.74343300 |
| C  | -7.32326800 | 0.04670600  | -6.78159300 |
| C  | -7.45323400 | -1.76542100 | -8.47417900 |
| C  | -6.91572000 | -2.89179400 | -9.07794800 |
| C  | -5.64992800 | -3.37989400 | -8.65359600 |
| C  | -4.93418800 | -2.72645600 | -7.66031900 |
| C  | -5.44038000 | -1.54431800 | -7.03712700 |
| C  | -6.74799500 | -1.07822500 | -7.44210200 |
| H  | -1.64553500 | -1.93677200 | -2.71027600 |
| H  | 0.25645400  | -2.29312300 | -4.34844500 |
| H  | 1.13020400  | -2.11723700 | -6.62446800 |
| H  | 0.83776000  | -1.47777400 | -9.01840400 |
| H  | -1.39772200 | -0.67539800 | -9.82707800 |
| H  | -3.32323800 | -0.57229700 | -8.28499500 |
| H  | -7.08936200 | 1.51470800  | -5.21195200 |
| H  | -8.30908200 | 0.39724400  | -7.09546000 |
| H  | -8.43570000 | -1.38856800 | -8.76952600 |
| H  | -7.46595600 | -3.41255600 | -9.86428400 |
| H  | -5.23776500 | -4.28360300 | -9.10766000 |
| H  | -3.97225400 | -3.12408000 | -7.34082500 |
| C  | -5.36937900 | 0.60514000  | -0.44668400 |
| C  | -6.71348800 | -0.52774500 | -2.16404100 |
| C  | -5.36567800 | -0.69810100 | 0.36793900  |



|    |             |             |             |
|----|-------------|-------------|-------------|
| H  | -6.21251700 | 1.24262400  | -0.12399500 |
| H  | -4.42179200 | 1.14110100  | -0.29304200 |
| C  | -6.66584300 | -1.80808200 | -1.30784500 |
| H  | -7.62218300 | 0.04543300  | -1.90708800 |
| H  | -6.74661400 | -0.78327400 | -3.23111100 |
| H  | -4.46863300 | -1.26728900 | 0.06270600  |
| H  | -5.77091800 | -2.38455800 | -1.60943600 |
| N  | -5.53529900 | 0.31662500  | -1.88568900 |
| O  | -6.55607100 | -1.46615600 | 0.08515300  |
| C  | -7.92674400 | -2.64978900 | -1.47772600 |
| H  | -8.02753500 | -2.97150100 | -2.52676900 |
| H  | -7.87929300 | -3.54425900 | -0.83696700 |
| H  | -8.81887100 | -2.06497400 | -1.19919700 |
| C  | -5.34923600 | -0.43285700 | 1.86927700  |
| H  | -5.36199000 | -1.38301400 | 2.42628200  |
| H  | -4.44051000 | 0.12411400  | 2.14423500  |
| H  | -6.23132000 | 0.15905000  | 2.16542600  |
| C  | -0.11197900 | 4.84488500  | -6.86497600 |
| H  | -1.17947500 | 5.03356900  | -7.04021800 |
| H  | 0.19738700  | 3.92077200  | -7.37342200 |
| C  | 0.76131600  | 6.01908800  | -7.17166800 |
| C  | 0.24442300  | 7.32901000  | -7.08571300 |
| C  | 2.12319800  | 5.83325500  | -7.48989400 |
| C  | 1.07208800  | 8.43433100  | -7.33184500 |
| H  | -0.80781600 | 7.47323900  | -6.83283700 |
| C  | 2.94998900  | 6.93959800  | -7.73539300 |
| H  | 2.52557100  | 4.82020600  | -7.55065300 |
| C  | 2.42675900  | 8.24237100  | -7.65652800 |
| H  | 0.66081300  | 9.44423200  | -7.27201900 |
| H  | 4.00084000  | 6.78577800  | -7.98975000 |
| H  | 3.07014200  | 9.10312700  | -7.85079900 |
| S  | -0.02028100 | 4.41358100  | -5.02735100 |
| O  | -0.47671800 | 5.62911700  | -4.23912800 |
| Na | 0.84668100  | 4.70177400  | -2.32212000 |
| O  | 1.40642900  | 4.01114500  | -4.69190400 |
| H  | -0.52227300 | 3.02680700  | -1.08230700 |
| H  | 0.37834000  | 2.02469200  | -2.34561800 |
| C  | -2.55449200 | 3.12105900  | -5.35502600 |
| C  | -2.89525400 | 2.32704600  | -6.47121700 |
| C  | -3.34587400 | 4.26122200  | -5.08145600 |
| C  | -3.99849900 | 2.64697200  | -7.27455600 |
| H  | -2.32324100 | 1.43245300  | -6.70520600 |
| C  | -4.44546200 | 4.58428700  | -5.88751400 |
| H  | -3.08427700 | 4.91886200  | -4.25368000 |

|   |             |            |             |
|---|-------------|------------|-------------|
| C | -4.78066100 | 3.77588500 | -6.98770000 |
| H | -4.25055200 | 2.00307500 | -8.11929300 |
| H | -5.03905600 | 5.47170800 | -5.65715700 |
| H | -5.64108300 | 4.02436700 | -7.61261200 |
| C | -0.52375700 | 1.59256900 | -4.95537200 |
| H | -0.27948500 | 1.64047100 | -6.02646500 |
| H | 0.41249700  | 1.52733000 | -4.38978100 |
| H | -1.10522800 | 0.68099000 | -4.76586100 |

**E-IM4a**

|   |             |             |             |
|---|-------------|-------------|-------------|
| C | -0.78393100 | -0.01732700 | -5.44495000 |
| C | -0.34656200 | 0.88751900  | -4.29269800 |
| H | -0.58532000 | -1.07210700 | -5.19710200 |
| H | -1.86461300 | 0.08554600  | -5.62183000 |
| C | -0.88714400 | 2.24595800  | -4.20776100 |
| C | -1.58268300 | 2.90135800  | -5.35187600 |
| H | -0.29016000 | 2.97000900  | -3.63869400 |
| C | 1.06995000  | 0.74428500  | -3.84422900 |
| C | 2.03934500  | 0.10080300  | -4.65867400 |
| C | 1.54470900  | 1.44311400  | -2.69732500 |
| C | 3.41703100  | 0.24071800  | -4.40050000 |
| H | 1.72122400  | -0.46119000 | -5.53594500 |
| C | 2.91468200  | 1.58762000  | -2.44440300 |
| H | 0.81653600  | 1.89120400  | -2.02150500 |
| C | 3.86623300  | 1.00878700  | -3.31198600 |
| H | 4.13762300  | -0.24149800 | -5.06494000 |
| H | 3.24057300  | 2.14161900  | -1.56378800 |
| H | 4.93398200  | 1.12537700  | -3.11792500 |
| O | -3.42700500 | 1.82854600  | -1.57504100 |
| H | -2.13307700 | 2.22709800  | -6.01760000 |
| H | -2.21296300 | 3.75490700  | -5.06414900 |
| H | -0.25919900 | 0.22473200  | -6.38678900 |
| C | -4.12914400 | 2.92874300  | -2.07561500 |
| C | -5.29807400 | 3.23108200  | -1.10207600 |
| C | -3.21889200 | 4.18262300  | -2.16818100 |
| C | -4.72227200 | 2.63314900  | -3.47965800 |
| H | -5.96751700 | 2.35658600  | -1.04049800 |
| H | -4.89944200 | 3.43216700  | -0.09315500 |
| H | -5.89232000 | 4.10572100  | -1.42423700 |
| H | -2.35581100 | 3.95753400  | -2.81400300 |
| H | -3.75090800 | 5.06332100  | -2.57460000 |
| H | -2.83741600 | 4.44240600  | -1.16525100 |
| H | -5.28631700 | 3.49140800  | -3.89179600 |
| H | -3.90596900 | 2.37667900  | -4.17430000 |

|    |             |             |             |
|----|-------------|-------------|-------------|
| H  | -5.40247000 | 1.76688900  | -3.41821700 |
| Pd | -1.82920200 | 0.97512700  | -2.77565700 |
| P  | -1.76223300 | -0.81428000 | -1.44355700 |
| O  | -1.66394800 | -0.37385900 | 0.19993500  |
| O  | -0.31919600 | -1.74176400 | -1.49189100 |
| C  | 0.67452600  | -0.08870700 | 0.64145600  |
| C  | -0.58065700 | 0.47522000  | 0.40709800  |
| C  | -0.80805000 | 1.87436000  | 0.33477700  |
| C  | 0.25388700  | 2.73613500  | 0.54152600  |
| C  | 2.68011400  | 3.11733800  | 0.91441400  |
| C  | 3.97189100  | 2.62956600  | 1.04983600  |
| C  | 4.20261300  | 1.22694700  | 1.02382900  |
| C  | 3.14396300  | 0.33897000  | 0.89275500  |
| C  | 1.79864400  | 0.80341400  | 0.78556400  |
| C  | 1.57093900  | 2.23237800  | 0.76488800  |
| C  | 0.78747800  | -1.57305500 | 0.67209000  |
| C  | 0.26560600  | -2.33379900 | -0.38658500 |
| C  | 0.37724000  | -3.75091600 | -0.41964100 |
| C  | 0.99305900  | -4.42494400 | 0.61747800  |
| C  | 2.06995900  | -4.40555200 | 2.85540200  |
| C  | 2.49669100  | -3.71860500 | 3.98141400  |
| C  | 2.33811500  | -2.30720700 | 4.04670600  |
| C  | 1.78434100  | -1.60600800 | 2.98518500  |
| C  | 1.36171100  | -2.27503600 | 1.79517400  |
| C  | 1.48563900  | -3.71558300 | 1.75182900  |
| H  | -1.81017200 | 2.20951300  | 0.05593200  |
| H  | 0.10585300  | 3.81802800  | 0.49839200  |
| H  | 2.48812500  | 4.19328000  | 0.90818300  |
| H  | 4.81168700  | 3.31875000  | 1.16123500  |
| H  | 5.22236300  | 0.84379000  | 1.10049300  |
| H  | 3.33579600  | -0.73250100 | 0.86316000  |
| H  | -0.03126300 | -4.27997400 | -1.28159100 |
| H  | 1.09093300  | -5.51259600 | 0.59092700  |
| H  | 2.16248400  | -5.49287500 | 2.79629600  |
| H  | 2.93915700  | -4.25735200 | 4.82185500  |
| H  | 2.64797400  | -1.76824000 | 4.94464800  |
| H  | 1.65986300  | -0.52696100 | 3.05848400  |
| C  | -4.21550100 | -1.67276300 | -2.17850600 |
| C  | -3.26941700 | -2.81392000 | -0.22417100 |
| C  | -5.30257100 | -1.07243900 | -1.27442700 |
| H  | -4.57522800 | -2.62248400 | -2.61402400 |
| H  | -3.97109400 | -0.97067200 | -2.99031600 |
| C  | -4.39236800 | -2.19804900 | 0.63627400  |
| H  | -3.59281100 | -3.80636400 | -0.58590600 |

|    |             |             |              |
|----|-------------|-------------|--------------|
| H  | -2.35525100 | -2.93307300 | 0.37154000   |
| H  | -4.91569600 | -0.10519900 | -0.90276300  |
| H  | -4.02407600 | -1.23202300 | 1.02949500   |
| N  | -2.99587700 | -1.95755800 | -1.39495900  |
| O  | -5.56403400 | -1.96268200 | -0.16590700  |
| C  | -4.79712200 | -3.12226700 | 1.78030600   |
| H  | -3.93700100 | -3.29747100 | 2.44634200   |
| H  | -5.61251100 | -2.67098800 | 2.36710400   |
| H  | -5.14281100 | -4.09183000 | 1.38533300   |
| C  | -6.61997500 | -0.87366900 | -2.01528300  |
| H  | -7.38249800 | -0.45771100 | -1.33784800  |
| H  | -6.47561500 | -0.17457400 | -2.85389500  |
| H  | -6.98931200 | -1.83384700 | -2.41280700  |
| C  | -1.08275200 | 4.59263300  | -7.80554100  |
| H  | -0.25783100 | 4.93032700  | -8.45088000  |
| H  | -1.55844000 | 5.45668400  | -7.32032300  |
| C  | -2.06690800 | 3.69336800  | -8.49949700  |
| C  | -1.63449700 | 2.78260000  | -9.48469200  |
| C  | -3.42345500 | 3.70644300  | -8.11512300  |
| C  | -2.54836200 | 1.89858700  | -10.07740900 |
| H  | -0.58363900 | 2.76729200  | -9.77880800  |
| C  | -4.33640400 | 2.82184000  | -8.70815100  |
| H  | -3.75771800 | 4.40919600  | -7.34880300  |
| C  | -3.89930400 | 1.91428200  | -9.68866900  |
| H  | -2.20630100 | 1.19708100  | -10.84082600 |
| H  | -5.38507300 | 2.84062200  | -8.40532800  |
| H  | -4.60870400 | 1.22407300  | -10.14952100 |
| S  | -0.23351100 | 3.68129100  | -6.42169700  |
| O  | 0.52530300  | 4.66692700  | -5.56828400  |
| Na | 2.21659400  | 2.82663800  | -4.97092000  |
| O  | 0.63890300  | 2.59793500  | -6.99617800  |

**E-IM4b**

|    |            |             |              |
|----|------------|-------------|--------------|
| Pd | 2.68621200 | -2.80034400 | -11.33828400 |
| P  | 3.19886200 | -1.46748600 | -9.61584700  |
| O  | 4.36350900 | -0.29705700 | -10.08469800 |
| O  | 4.14399700 | -2.22483000 | -8.39984000  |
| C  | 6.50143000 | -1.34853800 | -9.78056800  |
| C  | 5.49827400 | -0.87975900 | -10.63143300 |
| C  | 5.58218500 | -0.97740500 | -12.04439700 |
| C  | 6.69405400 | -1.56191100 | -12.62313800 |
| C  | 8.82582000 | -2.81633100 | -12.39465600 |
| C  | 9.78366900 | -3.43069600 | -11.60220100 |
| C  | 9.66943400 | -3.37536900 | -10.18618200 |

|   |             |             |              |
|---|-------------|-------------|--------------|
| C | 8.61904900  | -2.69414700 | -9.58687500  |
| C | 7.62517600  | -2.03396200 | -10.37003800 |
| C | 7.72523400  | -2.12216700 | -11.81084800 |
| C | 6.33251500  | -1.17089500 | -8.31160300  |
| C | 5.15135800  | -1.59883700 | -7.68805500  |
| C | 4.95590000  | -1.48480500 | -6.28434400  |
| C | 5.93371400  | -0.91504600 | -5.49176800  |
| C | 8.12087700  | 0.23951000  | -5.27115100  |
| C | 9.26022900  | 0.78301100  | -5.84409300  |
| C | 9.44101400  | 0.71392800  | -7.25248100  |
| C | 8.50090500  | 0.08790200  | -8.05870700  |
| C | 7.32794700  | -0.50889600 | -7.50188300  |
| C | 7.13022900  | -0.40142300 | -6.07295400  |
| H | 4.75780500  | -0.58891100 | -12.64001300 |
| H | 6.78046800  | -1.63405200 | -13.70977300 |
| H | 8.88747500  | -2.86736400 | -13.48469900 |
| H | 10.61735400 | -3.96602800 | -12.06122100 |
| H | 10.41186600 | -3.87845900 | -9.56300100  |
| H | 8.53834800  | -2.66829200 | -8.50118300  |
| H | 4.02272300  | -1.85827400 | -5.86097100  |
| H | 5.79325500  | -0.83205400 | -4.41169700  |
| H | 7.95374500  | 0.30121400  | -4.19296000  |
| H | 10.01046800 | 1.27444300  | -5.22120300  |
| H | 10.32577400 | 1.16433500  | -7.70751800  |
| H | 8.65232100  | 0.05540300  | -9.13641300  |
| C | 0.74173400  | -0.38154700 | -9.27463900  |
| C | 2.52701500  | 0.67096900  | -7.95297400  |
| C | 0.54387400  | 0.95299100  | -10.00842200 |
| H | 0.05483200  | -0.43444700 | -8.41008800  |
| H | 0.53674000  | -1.20625100 | -9.97037300  |
| C | 2.27727900  | 1.98212100  | -8.72481700  |
| H | 1.91979000  | 0.67349000  | -7.03004800  |
| H | 3.58642100  | 0.59022000  | -7.68031500  |
| H | 1.20663000  | 0.93654400  | -10.89313200 |
| H | 2.93168500  | 1.97643600  | -9.61818400  |
| N | 2.12706400  | -0.48893800 | -8.77270700  |
| O | 0.90577800  | 2.05748800  | -9.14964300  |
| C | 2.56319700  | 3.20733000  | -7.86208700  |
| H | 3.62010900  | 3.21156700  | -7.55053000  |
| H | 2.35743700  | 4.13022500  | -8.42679300  |
| H | 1.92853700  | 3.19842900  | -6.96064200  |
| C | -0.90451300 | 1.15613700  | -10.43590500 |
| H | -1.02310700 | 2.12503400  | -10.94644400 |
| H | -1.19797700 | 0.35331300  | -11.12869400 |

|   |             |             |              |
|---|-------------|-------------|--------------|
| H | -1.57313900 | 1.13710000  | -9.55901600  |
| C | 5.22118500  | -4.45733200 | -10.80265800 |
| C | 3.73414000  | -4.63818700 | -11.09092600 |
| H | 5.36170800  | -4.07494700 | -9.78384700  |
| H | 5.80114100  | -5.39888900 | -10.89072900 |
| O | 1.32350100  | -1.39283200 | -12.22554500 |
| C | 3.22367300  | -4.55370100 | -12.46020800 |
| C | 4.08208200  | -4.28711400 | -13.65482400 |
| H | 2.34474300  | -5.15642000 | -12.70783300 |
| C | 3.00337500  | -5.55443100 | -10.15091400 |
| C | 1.60520100  | -5.79026500 | -10.27904200 |
| C | 3.69673500  | -6.30235900 | -9.15952700  |
| C | 0.94348700  | -6.71619900 | -9.46606600  |
| H | 1.03889500  | -5.20740100 | -11.00672100 |
| C | 3.02703300  | -7.23590500 | -8.34471800  |
| H | 4.76604500  | -6.14692500 | -9.00881300  |
| C | 1.65007800  | -7.45214300 | -8.49341200  |
| H | -0.13280700 | -6.86035800 | -9.58512000  |
| H | 3.59182300  | -7.78611700 | -7.58845800  |
| H | 1.12988200  | -8.17138300 | -7.85783600  |
| H | 4.94530700  | -3.63241000 | -13.47909900 |
| H | 3.50157500  | -3.93170600 | -14.51764200 |
| H | 5.66526300  | -3.73732800 | -11.49430200 |
| C | 1.18193700  | -1.31025500 | -13.61202000 |
| C | 0.16149400  | -0.18481100 | -13.92779800 |
| C | 2.53310800  | -0.95702500 | -14.28748600 |
| C | 0.65518200  | -2.64031900 | -14.21223600 |
| H | -0.81325900 | -0.42211900 | -13.46926800 |
| H | 0.51605300  | 0.77180900  | -13.50913200 |
| H | 0.01205000  | -0.05829200 | -15.01550500 |
| H | 3.27207300  | -1.73572600 | -14.04169300 |
| H | 2.45257000  | -0.87294900 | -15.38760500 |
| H | 2.90399500  | 0.00349500  | -13.89038900 |
| H | 0.54968300  | -2.59769500 | -15.31237900 |
| H | 1.34999400  | -3.45241300 | -13.94887900 |
| H | -0.33068300 | -2.87890900 | -13.77632400 |
| C | 5.46036000  | -5.64695500 | -15.98612600 |
| H | 6.16755700  | -4.80968500 | -15.88864900 |
| H | 4.57538500  | -5.32665300 | -16.55491100 |
| C | 6.09263700  | -6.89610700 | -16.52436800 |
| C | 7.46491300  | -7.14342500 | -16.31577600 |
| C | 5.30727300  | -7.85662300 | -17.19435900 |
| C | 8.04728700  | -8.33035500 | -16.78474100 |
| H | 8.07050100  | -6.40123500 | -15.79196000 |

|    |            |              |              |
|----|------------|--------------|--------------|
| C  | 5.89138400 | -9.04304600  | -17.66228800 |
| H  | 4.24367500 | -7.66642900  | -17.35048300 |
| C  | 7.26167400 | -9.28225700  | -17.45786300 |
| H  | 9.11226100 | -8.51172900  | -16.62623500 |
| H  | 5.27883500 | -9.77900300  | -18.18703900 |
| H  | 7.71598200 | -10.20501100 | -17.82453300 |
| S  | 4.82890700 | -5.92144100  | -14.25568200 |
| O  | 5.97719600 | -6.29464900  | -13.35619900 |
| Na | 4.23262300 | -7.23332000  | -11.74492300 |
| O  | 3.72335200 | -6.94303100  | -14.27499800 |

**(R)-IM5**

|    |             |             |             |
|----|-------------|-------------|-------------|
| C  | -1.25183100 | 1.17786300  | -2.56897700 |
| C  | -2.45351700 | 1.67512000  | -3.19993800 |
| C  | -2.47017100 | 2.95127100  | -4.01108200 |
| H  | -3.23386000 | 0.96719500  | -3.49806800 |
| O  | -2.04344600 | 2.03729000  | 0.93072100  |
| C  | -0.73256700 | 1.72845500  | 1.30435900  |
| C  | -0.61059100 | 1.93756000  | 2.83692100  |
| C  | -0.38644200 | 0.25359000  | 0.97207600  |
| C  | 0.29286800  | 2.65042400  | 0.59181100  |
| H  | -0.84965200 | 2.98420300  | 3.09191200  |
| H  | -1.32496800 | 1.28127400  | 3.36249000  |
| H  | 0.40692900  | 1.71274800  | 3.20481500  |
| H  | -0.49933100 | 0.09584100  | -0.11287800 |
| H  | 0.64499600  | -0.01443400 | 1.26771300  |
| H  | -1.08571300 | -0.42105800 | 1.49585100  |
| H  | 1.33479300  | 2.44082000  | 0.89841800  |
| H  | 0.20904000  | 2.51010600  | -0.49863300 |
| H  | 0.06559000  | 3.70568800  | 0.82321800  |
| Pd | -2.65013300 | 1.92099700  | -1.11447700 |
| P  | -4.85519800 | 2.03602300  | -0.72814000 |
| O  | -5.42632200 | 0.41575700  | -0.41355500 |
| O  | -5.81224400 | 2.31259600  | -2.10564300 |
| C  | -5.25935700 | -0.56222700 | -2.60040600 |
| C  | -4.81405300 | -0.46785700 | -1.27736100 |
| C  | -3.71481500 | -1.22504200 | -0.78541500 |
| C  | -3.03556700 | -2.08745700 | -1.62221800 |
| C  | -2.62912000 | -2.98067900 | -3.90893800 |
| C  | -2.89157900 | -2.96629700 | -5.27613000 |
| C  | -3.91417500 | -2.11516100 | -5.78777600 |
| C  | -4.68540100 | -1.34058600 | -4.92702800 |
| C  | -4.46941300 | -1.35534600 | -3.51428100 |
| C  | -3.37680500 | -2.16083600 | -3.00574100 |

|   |              |             |             |
|---|--------------|-------------|-------------|
| C | -6.51086800  | 0.13410400  | -3.00341000 |
| C | -6.73425700  | 1.48887400  | -2.70522200 |
| C | -7.92486000  | 2.15654400  | -3.11170300 |
| C | -8.90621500  | 1.48380300  | -3.80764400 |
| C | -9.80762200  | -0.62383300 | -4.75291800 |
| C | -9.71066500  | -1.99058100 | -4.96414700 |
| C | -8.57141000  | -2.69096700 | -4.48600600 |
| C | -7.54049200  | -2.01866200 | -3.84339600 |
| C | -7.58115800  | -0.60307200 | -3.64744400 |
| C | -8.77107400  | 0.09209200  | -4.08517400 |
| H | -3.43371900  | -1.10541100 | 0.25989000  |
| H | -2.20394900  | -2.68799400 | -1.24910200 |
| H | -1.82741700  | -3.60117600 | -3.50239700 |
| H | -2.30618100  | -3.58705000 | -5.95633000 |
| H | -4.09393300  | -2.06985700 | -6.86302500 |
| H | -5.47021800  | -0.70182200 | -5.32814400 |
| H | -8.01767700  | 3.21706300  | -2.87824200 |
| H | -9.80826100  | 2.00431600  | -4.13695300 |
| H | -10.68962600 | -0.06876100 | -5.08175000 |
| H | -10.51160200 | -2.53009700 | -5.47347000 |
| H | -8.50734300  | -3.77368900 | -4.61359700 |
| H | -6.69392100  | -2.58882300 | -3.46593800 |
| C | -4.95076900  | 3.40594900  | 1.59440200  |
| C | -7.14881800  | 2.78664800  | 0.66624900  |
| C | -5.27351800  | 2.54304600  | 2.82563100  |
| H | -5.25471900  | 4.44946600  | 1.79450100  |
| H | -3.87009000  | 3.35836500  | 1.38822600  |
| C | -7.40357400  | 1.93619200  | 1.92613500  |
| H | -7.57090900  | 3.79540000  | 0.82417100  |
| H | -7.63521200  | 2.33254900  | -0.20747300 |
| H | -4.90778600  | 1.51675500  | 2.62386900  |
| H | -7.02057700  | 0.91581200  | 1.73151800  |
| N | -5.70250800  | 2.92194200  | 0.41674200  |
| O | -6.69823100  | 2.49420700  | 3.04927900  |
| C | -8.88494900  | 1.89140000  | 2.28701100  |
| H | -9.45875800  | 1.42822000  | 1.46830100  |
| H | -9.03853700  | 1.30165100  | 3.20427100  |
| H | -9.26891500  | 2.91092900  | 2.45570600  |
| C | -4.62692200  | 3.09791400  | 4.09003700  |
| H | -4.89481700  | 2.48030100  | 4.96170400  |
| H | -3.53152400  | 3.09832900  | 3.97815100  |
| H | -4.96669800  | 4.13078100  | 4.27277900  |
| C | -1.81670400  | 3.84700600  | -6.91936300 |
| H | -1.57153200  | 4.80238800  | -6.43508100 |



|    |             |             |              |
|----|-------------|-------------|--------------|
| H  | -2.90250100 | 3.75693600  | -7.04514600  |
| C  | -1.05692100 | 3.61429700  | -8.19057200  |
| C  | 0.24088600  | 4.14016500  | -8.35490000  |
| C  | -1.61831100 | 2.82466100  | -9.21496800  |
| C  | 0.96065300  | 3.89083000  | -9.53294900  |
| H  | 0.67969300  | 4.74334500  | -7.55808600  |
| C  | -0.89801300 | 2.57593500  | -10.39283100 |
| H  | -2.62252400 | 2.41609700  | -9.08501400  |
| C  | 0.39333100  | 3.10816900  | -10.55371400 |
| H  | 1.96296800  | 4.30675400  | -9.65459700  |
| H  | -1.34386000 | 1.96998300  | -11.18444200 |
| H  | 0.95363300  | 2.91616900  | -11.47122500 |
| S  | -1.36049200 | 2.54842700  | -5.64808300  |
| O  | 0.09331100  | 2.67165200  | -5.33307700  |
| Na | -1.89329600 | -0.48223000 | -4.67172100  |
| O  | -1.81464200 | 1.22152400  | -6.21892700  |
| H  | -1.14306400 | 0.09849900  | -2.39132700  |
| H  | -0.30589100 | 1.70794800  | -2.69766600  |
| C  | -3.84076400 | 3.30688000  | -4.56291200  |
| C  | -4.35755300 | 4.61564100  | -4.47138400  |
| C  | -4.61287700 | 2.33257800  | -5.23485100  |
| C  | -5.60299800 | 4.93867300  | -5.03350200  |
| H  | -3.79683500 | 5.39196700  | -3.95285300  |
| C  | -5.84900300 | 2.65490200  | -5.80632100  |
| H  | -4.23418500 | 1.31818200  | -5.33736100  |
| C  | -6.35113000 | 3.96315800  | -5.70997200  |
| H  | -5.98430300 | 5.95798000  | -4.94268200  |
| H  | -6.42485400 | 1.88130200  | -6.31775000  |
| H  | -7.31802300 | 4.21555700  | -6.14992600  |
| C  | -1.70870600 | 4.11421400  | -3.36466900  |
| H  | -0.70910700 | 3.79610400  | -3.04890300  |
| H  | -1.60853300 | 4.97200600  | -4.04758800  |
| H  | -2.26846100 | 4.43043400  | -2.47130900  |

**(S)-IM5**

|   |             |             |             |
|---|-------------|-------------|-------------|
| C | -0.57126200 | 2.54008300  | -2.01817900 |
| C | -1.52431600 | 2.99794100  | -3.01165700 |
| C | -1.32875000 | 2.86002200  | -4.49639100 |
| H | -2.16588600 | 3.83537500  | -2.72436500 |
| O | -2.11708400 | -0.49112800 | -0.77036500 |
| C | -1.21308100 | -0.49837800 | 0.29595700  |
| C | -1.49181800 | -1.76797800 | 1.14338900  |
| C | 0.25264300  | -0.54514100 | -0.20865100 |
| C | -1.39049000 | 0.74914000  | 1.20007500  |

|    |             |             |             |
|----|-------------|-------------|-------------|
| H  | -2.52339200 | -1.74061400 | 1.53168700  |
| H  | -1.38389300 | -2.66782500 | 0.51403100  |
| H  | -0.79754200 | -1.85396800 | 1.99903000  |
| H  | 0.45040600  | 0.34448500  | -0.82727600 |
| H  | 0.98514700  | -0.57284800 | 0.61979500  |
| H  | 0.40240000  | -1.44130400 | -0.83541900 |
| H  | -0.68752000 | 0.75614500  | 2.05416300  |
| H  | -1.22879500 | 1.65720400  | 0.59609400  |
| H  | -2.41929800 | 0.77987600  | 1.59569100  |
| Pd | -2.22632900 | 1.20498900  | -2.10873100 |
| P  | -4.16626600 | 0.36227100  | -2.86732700 |
| O  | -4.06028600 | -1.27349900 | -3.34623200 |
| O  | -4.75401500 | 0.97837000  | -4.34364300 |
| C  | -3.31292100 | -1.18077800 | -5.62259800 |
| C  | -3.03911400 | -1.42955700 | -4.27574100 |
| C  | -1.75612300 | -1.80368400 | -3.79692600 |
| C  | -0.71839900 | -1.95072200 | -4.69862100 |
| C  | 0.17995000  | -1.71639700 | -7.00184700 |
| C  | 0.01704900  | -1.34722400 | -8.32860600 |
| C  | -1.25404900 | -0.90534500 | -8.78684800 |
| C  | -2.34072600 | -0.86318000 | -7.92433900 |
| C  | -2.21510000 | -1.25303000 | -6.55625700 |
| C  | -0.91123300 | -1.66620000 | -6.08403900 |
| C  | -4.69661600 | -0.79650000 | -6.01484300 |
| C  | -5.35347300 | 0.25117500  | -5.35035500 |
| C  | -6.64719100 | 0.69470400  | -5.74179000 |
| C  | -7.31064300 | 0.07661500  | -6.78312800 |
| C  | -7.43074000 | -1.72711500 | -8.48559300 |
| C  | -6.88703800 | -2.84720200 | -9.09555500 |
| C  | -5.61881300 | -3.33095100 | -8.67348400 |
| C  | -4.90706700 | -2.67942600 | -7.67605700 |
| C  | -5.41975900 | -1.50358900 | -7.04626000 |
| C  | -6.72956900 | -1.04196400 | -7.44941000 |
| H  | -1.62849500 | -1.90123000 | -2.71721500 |
| H  | 0.27854300  | -2.23661200 | -4.35520700 |
| H  | 1.15568000  | -2.03662900 | -6.62818700 |
| H  | 0.86316000  | -1.38230600 | -9.01804800 |
| H  | -1.37719100 | -0.59190100 | -9.82575000 |
| H  | -3.30632900 | -0.51448200 | -8.28637400 |
| H  | -7.08391800 | 1.53817600  | -5.20653200 |
| H  | -8.29816200 | 0.42381100  | -7.09546500 |
| H  | -8.41510000 | -1.35383300 | -8.77925400 |
| H  | -7.43425200 | -3.36642600 | -9.88502300 |
| H  | -5.20161200 | -4.22980600 | -9.13258700 |

|    |             |             |             |
|----|-------------|-------------|-------------|
| H  | -3.94312900 | -3.07364900 | -7.35834200 |
| C  | -5.37559500 | 0.60855300  | -0.44882500 |
| C  | -6.70191200 | -0.52348000 | -2.17874200 |
| C  | -5.36147600 | -0.70041400 | 0.35658700  |
| H  | -6.22650300 | 1.23498200  | -0.12449500 |
| H  | -4.43435800 | 1.15368500  | -0.28788200 |
| C  | -6.64662500 | -1.80968400 | -1.33170400 |
| H  | -7.61686900 | 0.03970600  | -1.92133300 |
| H  | -6.72886200 | -0.77200300 | -3.24760400 |
| H  | -4.45749800 | -1.25800800 | 0.05016800  |
| H  | -5.74639500 | -2.37677100 | -1.63486500 |
| N  | -5.53263300 | 0.32940600  | -1.89034900 |
| O  | -6.54380000 | -1.47774800 | 0.06424300  |
| C  | -7.90023200 | -2.66021200 | -1.51163700 |
| H  | -7.99622300 | -2.97343800 | -2.56371100 |
| H  | -7.84688700 | -3.55994000 | -0.87871500 |
| H  | -8.79772100 | -2.08519800 | -1.22986400 |
| C  | -5.35317200 | -0.44660300 | 1.85995100  |
| H  | -5.35689500 | -1.40113200 | 2.40962800  |
| H  | -4.45188000 | 0.11855300  | 2.14255000  |
| H  | -6.24299500 | 0.13284800  | 2.15771900  |
| C  | -0.13030200 | 4.71031200  | -6.81482300 |
| H  | -1.19496100 | 4.87647400  | -7.02489700 |
| H  | 0.19976500  | 3.76337900  | -7.26476600 |
| C  | 0.73837500  | 5.87643400  | -7.17183900 |
| C  | 0.20996400  | 7.18394800  | -7.15096700 |
| C  | 2.10126100  | 5.68437100  | -7.47921300 |
| C  | 1.02981500  | 8.28233800  | -7.44859100 |
| H  | -0.84395100 | 7.33109500  | -6.90709700 |
| C  | 2.91998100  | 6.78400100  | -7.77705400 |
| H  | 2.51075400  | 4.67240200  | -7.49041500 |
| C  | 2.38642300  | 8.08475000  | -7.76148200 |
| H  | 0.61100000  | 9.29077500  | -7.43851600 |
| H  | 3.97226800  | 6.62628500  | -8.02255100 |
| H  | 3.02355800  | 8.94005700  | -7.99598200 |
| S  | -0.06743800 | 4.39295100  | -4.96524300 |
| O  | -0.55411200 | 5.63013900  | -4.24396600 |
| Na | 0.74532200  | 4.78533600  | -2.24804000 |
| O  | 1.34387200  | 4.00609900  | -4.57891200 |
| H  | -0.54722000 | 3.05188500  | -1.04402200 |
| H  | 0.37533500  | 2.07300100  | -2.30880600 |
| C  | -2.55858900 | 3.16250500  | -5.33521000 |
| C  | -2.88854900 | 2.37070300  | -6.45509600 |
| C  | -3.37796000 | 4.27626700  | -5.04194500 |

|   |             |            |             |
|---|-------------|------------|-------------|
| C | -4.00732500 | 2.66874000 | -7.24550800 |
| H | -2.29451700 | 1.49575000 | -6.70677800 |
| C | -4.49510500 | 4.57648900 | -5.83323900 |
| H | -3.12995000 | 4.93055200 | -4.20768900 |
| C | -4.81780600 | 3.77193800 | -6.93925400 |
| H | -4.24866800 | 2.02732300 | -8.09515500 |
| H | -5.11190300 | 5.44323800 | -5.58579100 |
| H | -5.69104900 | 4.00260900 | -7.55311900 |
| C | -0.53848900 | 1.62482200 | -4.93161200 |
| H | -0.26452100 | 1.66086000 | -5.99604900 |
| H | 0.37754700  | 1.51693400 | -4.34089600 |
| H | -1.16996500 | 0.74494900 | -4.75677300 |

**IM6a-exo**

|    |             |             |             |
|----|-------------|-------------|-------------|
| C  | -0.79952400 | -0.95481300 | -5.09364700 |
| C  | -0.13115600 | 0.22518500  | -4.40721700 |
| H  | -1.11465300 | -1.69053300 | -4.34043500 |
| H  | -1.67447800 | -0.64782200 | -5.68002400 |
| C  | -0.26683500 | 1.55814100  | -4.90199600 |
| C  | -1.41726400 | 2.03228500  | -5.56884800 |
| H  | 0.44999400  | 2.30417700  | -4.54987000 |
| C  | 0.98193900  | -0.06685300 | -3.46484400 |
| C  | 1.62185600  | -1.32739600 | -3.45935600 |
| C  | 1.42697000  | 0.90807300  | -2.53847900 |
| C  | 2.68273100  | -1.59340700 | -2.58117700 |
| H  | 1.29548000  | -2.10556900 | -4.14894900 |
| C  | 2.48345800  | 0.64292800  | -1.66099600 |
| H  | 0.90520500  | 1.86425700  | -2.47797600 |
| C  | 3.12154300  | -0.61068400 | -1.67973400 |
| H  | 3.16357700  | -2.57395200 | -2.60008600 |
| H  | 2.79670500  | 1.40771700  | -0.94701900 |
| H  | 3.94133700  | -0.82160500 | -0.98982500 |
| H  | -2.05409100 | 1.38342000  | -6.17275900 |
| H  | -1.49204900 | 3.09917200  | -5.77619800 |
| H  | -0.08376700 | -1.44566300 | -5.77793000 |
| Pd | -1.97787900 | 1.35310300  | -3.50913400 |
| P  | -3.81606200 | 2.67880900  | -3.38525000 |
| O  | -5.15221700 | 2.05109300  | -4.15936600 |
| O  | -3.54427400 | 4.06318800  | -4.33891900 |
| C  | -4.86114600 | 2.67055100  | -6.46375100 |
| C  | -4.85452700 | 1.68346200  | -5.47927400 |
| C  | -4.53465900 | 0.32743700  | -5.72896100 |
| C  | -4.20523900 | -0.05522000 | -7.01676600 |
| C  | -3.73299300 | 0.53007900  | -9.38357100 |

|   |             |             |              |
|---|-------------|-------------|--------------|
| C | -3.60979600 | 1.47621300  | -10.38882800 |
| C | -3.88263200 | 2.84399300  | -10.11162200 |
| C | -4.29354200 | 3.24215000  | -8.84785600  |
| C | -4.45279700 | 2.29262500  | -7.79383600  |
| C | -4.13967700 | 0.90634500  | -8.06865900  |
| C | -5.23060500 | 4.06491800  | -6.08801500  |
| C | -4.56596400 | 4.70427400  | -5.03408500  |
| C | -4.83706800 | 6.04855600  | -4.66823300  |
| C | -5.81129200 | 6.76101000  | -5.34117800  |
| C | -7.62175300 | 6.85652400  | -7.03804300  |
| C | -8.39138900 | 6.24313700  | -8.01428200  |
| C | -8.14507400 | 4.88568600  | -8.35713800  |
| C | -7.12779300 | 4.17150000  | -7.74033000  |
| C | -6.29821300 | 4.77743900  | -6.74808500  |
| C | -6.57487000 | 6.14760900  | -6.37732600  |
| H | -4.54695100 | -0.37929500 | -4.90245100  |
| H | -3.96314800 | -1.09691400 | -7.23663600  |
| H | -3.50884000 | -0.52179700 | -9.57574000  |
| H | -3.29252100 | 1.17714200  | -11.38977600 |
| H | -3.76292800 | 3.59006500  | -10.89977600 |
| H | -4.49262700 | 4.29379700  | -8.64793000  |
| H | -4.26117600 | 6.49414400  | -3.85650800  |
| H | -6.02176600 | 7.79863600  | -5.07373500  |
| H | -7.80874200 | 7.89346000  | -6.74871600  |
| H | -9.19237200 | 6.79380700  | -8.51140300  |
| H | -8.76623000 | 4.39638400  | -9.11021900  |
| H | -6.95978800 | 3.12993200  | -8.00936400  |
| C | -3.63752000 | 3.48934900  | -0.82118200  |
| C | -5.77507100 | 3.97221800  | -1.94336100  |
| C | -4.40985100 | 3.35336300  | 0.50021900   |
| H | -3.27788200 | 4.53101100  | -0.91841000  |
| H | -2.77923200 | 2.80356600  | -0.81782800  |
| C | -6.47708600 | 3.81573200  | -0.58411500  |
| H | -5.52388200 | 5.03656000  | -2.09849600  |
| H | -6.43867000 | 3.63886500  | -2.75037300  |
| H | -4.72377900 | 2.29746200  | 0.61418300   |
| H | -6.76321800 | 2.75108100  | -0.46352900  |
| N | -4.53845300 | 3.15414300  | -1.95077900  |
| O | -5.58640400 | 4.18261800  | 0.48284600   |
| C | -7.70805300 | 4.71154300  | -0.49026500  |
| H | -8.43696400 | 4.43507200  | -1.26836700  |
| H | -8.18350400 | 4.60070600  | 0.49640700   |
| H | -7.42427900 | 5.76718700  | -0.62921500  |
| C | -3.55267700 | 3.77603100  | 1.68777300   |

|   |             |             |             |
|---|-------------|-------------|-------------|
| H | -4.13124300 | 3.69724300  | 2.62107000  |
| H | -2.67054700 | 3.12116400  | 1.75923700  |
| H | -3.21535600 | 4.81826000  | 1.56761000  |
| C | -3.82169600 | -0.27770600 | -1.03808000 |
| H | -4.24421000 | 0.69197500  | -0.74689300 |
| H | -3.70196600 | -0.90786500 | -0.14118100 |
| C | -4.66965300 | -0.93966400 | -2.09271900 |
| C | -5.91641900 | -0.37385000 | -2.43081900 |
| C | -4.27591800 | -2.13659600 | -2.73182100 |
| C | -6.76021200 | -0.99138900 | -3.36645200 |
| H | -6.22122300 | 0.55804100  | -1.95252400 |
| C | -5.11288000 | -2.74770400 | -3.67870900 |
| H | -3.31159900 | -2.57743200 | -2.48134800 |
| C | -6.36075900 | -2.18167900 | -3.99561200 |
| H | -7.72176400 | -0.53564500 | -3.61256800 |
| H | -4.79228900 | -3.67171100 | -4.16561500 |
| H | -7.01140900 | -2.66080000 | -4.73043200 |
| S | -2.03252300 | 0.06997900  | -1.51474700 |
| O | -1.42714300 | -1.30695600 | -1.68547900 |
| O | -1.50964200 | 0.87170300  | -0.33574700 |

**IM6b-endo**

|    |             |             |              |
|----|-------------|-------------|--------------|
| Pd | 0.34310800  | -3.29363500 | -13.94258800 |
| P  | -1.58486800 | -2.48249500 | -14.84415100 |
| O  | -2.49473200 | -3.72853300 | -15.48152100 |
| O  | -1.22048500 | -1.62263000 | -16.26784400 |
| C  | -1.60969400 | -4.06605700 | -17.69066800 |
| C  | -1.75455600 | -4.51063200 | -16.37759700 |
| C  | -1.16951400 | -5.70073300 | -15.88270900 |
| C  | -0.40075600 | -6.47280700 | -16.73437900 |
| C  | 0.68859200  | -6.81131100 | -18.94024400 |
| C  | 0.96738700  | -6.37450200 | -20.22591200 |
| C  | 0.40939500  | -5.15421100 | -20.69627700 |
| C  | -0.43110400 | -4.40206900 | -19.88825400 |
| C  | -0.75766200 | -4.83153800 | -18.56674200 |
| C  | -0.16039100 | -6.05611000 | -18.07746100 |
| C  | -2.28248700 | -2.80197000 | -18.10446900 |
| C  | -2.07117200 | -1.62860900 | -17.37018100 |
| C  | -2.64284000 | -0.38451100 | -17.74304400 |
| C  | -3.46764600 | -0.31201400 | -18.84951000 |
| C  | -4.67593000 | -1.42842600 | -20.71016500 |
| C  | -5.01136900 | -2.57620000 | -21.41160900 |
| C  | -4.46652300 | -3.82883500 | -21.01756600 |
| C  | -3.58395700 | -3.91422500 | -19.95036800 |

|   |             |             |              |
|---|-------------|-------------|--------------|
| C | -3.19644300 | -2.74983700 | -19.21957000 |
| C | -3.77987600 | -1.48269800 | -19.60169200 |
| H | -1.33646700 | -5.97527000 | -14.84339000 |
| H | 0.05776900  | -7.39777900 | -16.37856700 |
| H | 1.12459800  | -7.73739500 | -18.55831100 |
| H | 1.62321200  | -6.95833100 | -20.87475100 |
| H | 0.64817900  | -4.80226300 | -21.70190300 |
| H | -0.84650600 | -3.46586800 | -20.25778200 |
| H | -2.41204600 | 0.49600200  | -17.14257200 |
| H | -3.90630900 | 0.64156200  | -19.15072600 |
| H | -5.09992800 | -0.46034400 | -20.98735900 |
| H | -5.70078100 | -2.52389500 | -22.25658800 |
| H | -4.74892800 | -4.73547900 | -21.55669700 |
| H | -3.18360700 | -4.88319400 | -19.65624800 |
| C | -2.39918200 | -0.59485600 | -13.09725500 |
| C | -4.12635000 | -1.41311000 | -14.64433500 |
| C | -3.49848000 | -0.38328800 | -12.04506700 |
| H | -2.25827600 | 0.34645700  | -13.66123200 |
| H | -1.46312200 | -0.87146600 | -12.59382900 |
| C | -5.16961100 | -1.18700600 | -13.53751100 |
| H | -4.06967500 | -0.50671800 | -15.27299300 |
| H | -4.41824800 | -2.26569900 | -15.26830500 |
| H | -3.59466200 | -1.31236200 | -11.45022200 |
| H | -5.24513900 | -2.11642400 | -12.93725600 |
| N | -2.80687900 | -1.68188500 | -14.02088400 |
| O | -4.76157500 | -0.10907600 | -12.67928800 |
| C | -6.52874300 | -0.82269100 | -14.12694200 |
| H | -6.90096000 | -1.64618900 | -14.75664400 |
| H | -7.25481800 | -0.63693700 | -13.32056900 |
| H | -6.44654000 | 0.08635700  | -14.74434000 |
| C | -3.17030300 | 0.79150300  | -11.13048000 |
| H | -3.98055900 | 0.94279300  | -10.40061500 |
| H | -2.23487400 | 0.58878300  | -10.58631300 |
| H | -3.04847900 | 1.71513300  | -11.71929000 |
| C | 3.30054900  | -2.93583000 | -13.27733500 |
| C | 2.52165700  | -4.14298400 | -13.77676600 |
| H | 3.13453500  | -2.78878200 | -12.20047400 |
| H | 4.38258000  | -3.09769300 | -13.43330300 |
| C | 1.99477400  | -4.20150100 | -15.10420600 |
| C | 1.52473400  | -3.08249200 | -15.82265100 |
| H | 1.72168000  | -5.18284500 | -15.49691500 |
| C | 2.67752500  | -5.42224300 | -13.03699500 |
| C | 1.76712800  | -6.48877700 | -13.23598600 |
| C | 3.72858200  | -5.61157000 | -12.11163400 |

|   |             |             |              |
|---|-------------|-------------|--------------|
| C | 1.91841300  | -7.70475800 | -12.56280900 |
| H | 0.90583800  | -6.33907200 | -13.88713500 |
| C | 3.87980700  | -6.83046200 | -11.43298200 |
| H | 4.44002000  | -4.80732000 | -11.92387700 |
| C | 2.97976300  | -7.88443500 | -11.65681500 |
| H | 1.19233900  | -8.50403900 | -12.72567400 |
| H | 4.70276900  | -6.95344900 | -10.72546900 |
| H | 3.09436600  | -8.82996500 | -11.12247100 |
| H | 1.92631500  | -2.07574600 | -15.67719700 |
| H | 1.00730700  | -3.25890600 | -16.76434800 |
| H | 3.01522200  | -2.01676600 | -13.80587400 |
| C | -1.92340500 | -3.99128900 | -11.38224500 |
| H | -2.56210400 | -3.16973400 | -11.72907500 |
| H | -2.00011600 | -4.08097200 | -10.28599100 |
| C | -2.26220200 | -5.27418400 | -12.09499900 |
| C | -3.38751000 | -5.31972000 | -12.94373900 |
| C | -1.48881400 | -6.44468000 | -11.93243000 |
| C | -3.74794500 | -6.50631300 | -13.60049600 |
| H | -3.97895700 | -4.41429200 | -13.08858000 |
| C | -1.84038000 | -7.62788100 | -12.60043100 |
| H | -0.60599100 | -6.41317500 | -11.29497900 |
| C | -2.97361200 | -7.66602000 | -13.43242400 |
| H | -4.62351500 | -6.52019500 | -14.25325300 |
| H | -1.22864800 | -8.52289200 | -12.46637800 |
| H | -3.24606300 | -8.58886100 | -13.94929600 |
| S | -0.15288200 | -3.40006100 | -11.62514200 |
| O | 0.68119400  | -4.37853300 | -10.83089600 |
| O | -0.15796100 | -1.97964900 | -11.08087500 |

**IM6a<sup>3-exo</sup>**

|    |             |             |              |
|----|-------------|-------------|--------------|
| Pd | 0.97661100  | -5.46774000 | -14.21853100 |
| P  | -0.56694100 | -3.88903400 | -14.72470500 |
| O  | -0.50707200 | -3.52650700 | -16.37664100 |
| O  | -0.14347300 | -2.37821900 | -14.10051700 |
| C  | 1.24107600  | -1.87898300 | -16.55498300 |
| C  | 0.78581500  | -3.17839000 | -16.78160600 |
| C  | 1.58219800  | -4.18591200 | -17.37835900 |
| C  | 2.88127100  | -3.89068800 | -17.74813300 |
| C  | 4.79942500  | -2.31399100 | -17.79450300 |
| C  | 5.35307700  | -1.08144100 | -17.48579000 |
| C  | 4.55954000  | -0.08913500 | -16.84720900 |
| C  | 3.22695600  | -0.33248400 | -16.54734000 |
| C  | 2.61709300  | -1.58250400 | -16.86902000 |
| C  | 3.43638800  | -2.60297100 | -17.48728100 |



|   |             |             |              |
|---|-------------|-------------|--------------|
| C | 0.30838700  | -0.88157100 | -15.96129900 |
| C | -0.36238200 | -1.17575800 | -14.76904700 |
| C | -1.23419900 | -0.25205500 | -14.13551100 |
| C | -1.46306200 | 0.98208600  | -14.71408400 |
| C | -1.13342700 | 2.57387000  | -16.59107600 |
| C | -0.58334200 | 2.88429000  | -17.82493700 |
| C | 0.25414500  | 1.94136200  | -18.48106000 |
| C | 0.54646700  | 0.72041100  | -17.89039100 |
| C | 0.02094900  | 0.37687600  | -16.60745700 |
| C | -0.86062700 | 1.32351200  | -15.96045600 |
| H | 1.16071800  | -5.17984000 | -17.51786000 |
| H | 3.50937900  | -4.65467500 | -18.21049600 |
| H | 5.40052100  | -3.09383000 | -18.26810500 |
| H | 6.39906200  | -0.87397600 | -17.71988300 |
| H | 5.00425500  | 0.87303100  | -16.58513100 |
| H | 2.63312100  | 0.43408700  | -16.05187500 |
| H | -1.70641400 | -0.54050500 | -13.19593100 |
| H | -2.12475400 | 1.70494000  | -14.23227000 |
| H | -1.79537600 | 3.27813700  | -16.08156100 |
| H | -0.80089300 | 3.84293000  | -18.30002600 |
| H | 0.66754000  | 2.17630300  | -19.46406600 |
| H | 1.18085100  | 0.00661300  | -18.41317700 |
| C | -2.77075600 | -5.34809700 | -14.01619000 |
| C | -3.20605900 | -3.16857100 | -15.07520400 |
| C | -3.49005600 | -6.02570100 | -15.19396400 |
| H | -3.49761700 | -5.13922400 | -13.21221800 |
| H | -1.97618600 | -6.00378500 | -13.64209900 |
| C | -3.91126200 | -3.91042100 | -16.22685000 |
| H | -3.94785200 | -2.90051100 | -14.30369500 |
| H | -2.73209700 | -2.25150500 | -15.44574500 |
| H | -2.72669100 | -6.24279800 | -15.96575200 |
| H | -3.14851300 | -4.14241200 | -16.99561800 |
| N | -2.19646300 | -4.05479500 | -14.45185900 |
| O | -4.48431900 | -5.13772800 | -15.74879200 |
| C | -5.03747500 | -3.07375500 | -16.82624100 |
| H | -4.63217000 | -2.13969400 | -17.24702700 |
| H | -5.54217800 | -3.63367700 | -17.62880000 |
| H | -5.78084700 | -2.82136200 | -16.05255600 |
| C | -4.19243300 | -7.30760500 | -14.76568900 |
| H | -4.73768200 | -7.74359700 | -15.61819900 |
| H | -3.44349000 | -8.02931900 | -14.40448400 |
| H | -4.91486400 | -7.09844100 | -13.95899800 |
| C | 3.61224200  | -6.60260500 | -15.30585600 |
| C | 3.08392600  | -6.53854100 | -13.88370100 |

|   |             |              |              |
|---|-------------|--------------|--------------|
| H | 4.68375500  | -6.87241200  | -15.28804300 |
| H | 3.08558900  | -7.37474700  | -15.88124500 |
| C | 2.91630700  | -5.30536800  | -13.19872400 |
| C | 2.58815100  | -4.09099200  | -13.86799300 |
| H | 2.81179300  | -5.32657500  | -12.11153800 |
| C | 3.04709500  | -7.80705300  | -13.11290700 |
| C | 3.70269500  | -8.96652500  | -13.59108500 |
| C | 2.31364000  | -7.91236300  | -11.90424700 |
| C | 3.64507000  | -10.17401400 | -12.87881100 |
| H | 4.25923200  | -8.93085300  | -14.52650400 |
| C | 2.26085300  | -9.11424200  | -11.19138600 |
| H | 1.73696600  | -7.05720300  | -11.54901400 |
| C | 2.92808900  | -10.25470400 | -11.67484900 |
| H | 4.16106600  | -11.05363000 | -13.26996400 |
| H | 1.67729000  | -9.16937500  | -10.27010000 |
| H | 2.87666100  | -11.19680300 | -11.12524100 |
| H | 2.35693800  | -3.21880300  | -13.25415100 |
| H | 2.95850800  | -3.86190500  | -14.87144300 |
| H | 3.50881600  | -5.64536800  | -15.82714600 |
| C | -0.21144700 | -9.43412800  | -16.04260800 |
| H | -1.17740900 | -9.09223700  | -16.44298300 |
| H | -0.25625500 | -10.50845500 | -15.80859900 |
| C | 0.94803500  | -9.08543800  | -16.91680800 |
| C | 0.89909000  | -7.96895000  | -17.78069700 |
| C | 2.14969900  | -9.82472900  | -16.84327800 |
| C | 2.00691100  | -7.61988200  | -18.56790100 |
| H | -0.01775300 | -7.37935700  | -17.83218700 |
| C | 3.26051200  | -9.47587600  | -17.62807900 |
| H | 2.20539500  | -10.68235100 | -16.16858900 |
| C | 3.19285800  | -8.37280500  | -18.49674800 |
| H | 1.94424100  | -6.75954700  | -19.23793700 |
| H | 4.17793900  | -10.06534600 | -17.56150400 |
| H | 4.05394800  | -8.10286100  | -19.11197700 |
| S | -0.09334700 | -8.56985000  | -14.33178700 |
| O | -1.35402100 | -9.02809300  | -13.60862400 |
| O | -0.28440200 | -7.07126600  | -14.87968800 |

**IM6b'-endo**

|    |            |             |              |
|----|------------|-------------|--------------|
| Pd | 2.06686700 | -4.59815000 | -15.24318100 |
| P  | 0.29194200 | -3.36691800 | -15.83259200 |
| O  | 0.15971500 | -2.84336100 | -17.42677600 |
| O  | 0.40326500 | -1.87672900 | -15.02660900 |
| C  | 0.48899500 | -0.43916700 | -17.44843400 |
| C  | 0.83701200 | -1.71925300 | -17.88948600 |

|   |             |             |              |
|---|-------------|-------------|--------------|
| C | 1.81930700  | -1.93928900 | -18.88938000 |
| C | 2.51142000  | -0.86727000 | -19.42016800 |
| C | 3.02456500  | 1.56276000  | -19.44271300 |
| C | 2.81576700  | 2.84198200  | -18.95154300 |
| C | 1.84597100  | 3.05842900  | -17.93470600 |
| C | 1.08780300  | 2.00610800  | -17.44206600 |
| C | 1.25981800  | 0.67828000  | -17.93901200 |
| C | 2.27135600  | 0.45656700  | -18.94860900 |
| C | -0.63210100 | -0.25876100 | -16.48353900 |
| C | -0.62139100 | -0.96256000 | -15.27879900 |
| C | -1.61344300 | -0.79577500 | -14.27989200 |
| C | -2.66681100 | 0.07006700  | -14.50759200 |
| C | -3.90583900 | 1.60022200  | -16.02057700 |
| C | -4.04168200 | 2.23388600  | -17.24592000 |
| C | -3.05685400 | 2.04306900  | -18.25356600 |
| C | -1.94696300 | 1.24463500  | -18.01788800 |
| C | -1.76322300 | 0.59270900  | -16.76079500 |
| C | -2.78397800 | 0.76173400  | -15.74952900 |
| H | 2.01075800  | -2.96140700 | -19.21492100 |
| H | 3.26584600  | -1.02423700 | -20.19385000 |
| H | 3.77826300  | 1.37510800  | -20.21109600 |
| H | 3.40092000  | 3.68101700  | -19.33316000 |
| H | 1.69941100  | 4.06254800  | -17.53158500 |
| H | 0.35743100  | 2.18869900  | -16.65561300 |
| H | -1.52578300 | -1.36244800 | -13.35242900 |
| H | -3.43864300 | 0.21455800  | -13.74882900 |
| H | -4.66248300 | 1.72159700  | -15.24188700 |
| H | -4.90747600 | 2.86865100  | -17.44451600 |
| H | -3.17737600 | 2.52502600  | -19.22590400 |
| H | -1.20671900 | 1.10113200  | -18.80329900 |
| C | -1.54648600 | -4.97501800 | -14.63800900 |
| C | -2.47806200 | -3.43112200 | -16.30437800 |
| C | -2.45587100 | -6.07297200 | -15.20357500 |
| H | -2.07020100 | -4.46579300 | -13.80736300 |
| H | -0.61283400 | -5.42091900 | -14.26303400 |
| C | -3.36752500 | -4.57880100 | -16.81481400 |
| H | -3.02858900 | -2.86044200 | -15.53699100 |
| H | -2.21736200 | -2.75941300 | -17.12890200 |
| H | -1.90795000 | -6.58127400 | -16.02228200 |
| H | -2.81456900 | -5.11251600 | -17.61496900 |
| N | -1.24799500 | -3.99362800 | -15.70208400 |
| O | -3.66035800 | -5.50409700 | -15.75404300 |
| C | -4.69575000 | -4.04994500 | -17.34784100 |
| H | -4.52024600 | -3.37112100 | -18.19754100 |

|   |             |             |              |
|---|-------------|-------------|--------------|
| H | -5.32935400 | -4.88453200 | -17.68592300 |
| H | -5.23124500 | -3.49788900 | -16.55863600 |
| C | -2.84408900 | -7.07891500 | -14.12607800 |
| H | -3.49059100 | -7.86395800 | -14.54909200 |
| H | -1.93634600 | -7.54378200 | -13.70769400 |
| H | -3.39076900 | -6.57440600 | -13.31253500 |
| C | 4.51557600  | -4.00723200 | -13.38768900 |
| C | 4.55302600  | -4.95928100 | -14.56939700 |
| H | 5.50954400  | -3.97675000 | -12.90988700 |
| H | 4.22851100  | -2.99127100 | -13.68378500 |
| C | 4.21628300  | -4.56186000 | -15.87515400 |
| C | 3.50023100  | -3.36131200 | -16.20293100 |
| H | 4.33119400  | -5.29303600 | -16.67760200 |
| C | 5.11466100  | -6.30830700 | -14.32458200 |
| C | 5.02015700  | -6.89952700 | -13.04032300 |
| C | 5.77813700  | -7.03679900 | -15.34398300 |
| C | 5.53398800  | -8.17892700 | -12.79539700 |
| H | 4.51427200  | -6.36781900 | -12.23532600 |
| C | 6.29788100  | -8.31316000 | -15.09597100 |
| H | 5.91233800  | -6.59481200 | -16.33064600 |
| C | 6.17096200  | -8.89521000 | -13.82276700 |
| H | 5.43086100  | -8.61928600 | -11.80173700 |
| H | 6.81105200  | -8.85008900 | -15.89643700 |
| H | 6.57330700  | -9.89200000 | -13.63112800 |
| H | 3.61536200  | -2.45013800 | -15.60711200 |
| H | 3.32124300  | -3.17965500 | -17.26289100 |
| H | 3.79755500  | -4.34990400 | -12.62615400 |
| C | 0.85791200  | -8.08881000 | -15.59569600 |
| H | -0.20487800 | -7.81256400 | -15.56044200 |
| H | 0.95577100  | -9.18497900 | -15.56542300 |
| C | 1.57640200  | -7.48956800 | -16.75616300 |
| C | 0.98999100  | -6.44772200 | -17.51029500 |
| C | 2.87546500  | -7.92297200 | -17.10781500 |
| C | 1.66786200  | -5.87342900 | -18.59737000 |
| H | -0.01088500 | -6.10463800 | -17.24477900 |
| C | 3.55916300  | -7.34117900 | -18.18531100 |
| H | 3.34609400  | -8.72228100 | -16.53162400 |
| C | 2.95713700  | -6.31499100 | -18.93763400 |
| H | 1.18480100  | -5.08342600 | -19.17412300 |
| H | 4.56068100  | -7.69270100 | -18.44324300 |
| H | 3.48611800  | -5.87102400 | -19.78400500 |
| S | 1.53572700  | -7.57651000 | -13.85677600 |
| O | 0.54214000  | -8.25842600 | -12.92768100 |
| O | 1.23543600  | -6.00068300 | -13.83187800 |

**IM6a'-exo-1**

|    |             |             |              |
|----|-------------|-------------|--------------|
| Pd | 1.69202400  | -4.54581000 | -14.97874800 |
| P  | -0.08532300 | -3.22495800 | -15.55542200 |
| O  | -0.85711900 | -3.41444600 | -17.04567800 |
| O  | 0.37933600  | -1.61182000 | -15.68066600 |
| C  | -0.27442500 | -1.51278200 | -18.42794600 |
| C  | -0.26324900 | -2.89050200 | -18.19267600 |
| C  | 0.27073300  | -3.81965900 | -19.11992600 |
| C  | 0.83889200  | -3.36480200 | -20.29554900 |
| C  | 1.59356700  | -1.48630000 | -21.73072300 |
| C  | 1.74169500  | -0.12661000 | -21.95480800 |
| C  | 1.23451800  | 0.80453400  | -21.00694500 |
| C  | 0.57572900  | 0.36778800  | -19.86709000 |
| C  | 0.38836600  | -1.02439900 | -19.61176400 |
| C  | 0.93330500  | -1.96818500 | -20.56148700 |
| C  | -0.91938900 | -0.59855100 | -17.44487900 |
| C  | -0.54985300 | -0.66477600 | -16.09963500 |
| C  | -1.06569100 | 0.21485400  | -15.11493000 |
| C  | -2.00329700 | 1.16467600  | -15.47446100 |
| C  | -3.49849700 | 2.17252000  | -17.18091900 |
| C  | -3.99876200 | 2.21097000  | -18.47297100 |
| C  | -3.50464000 | 1.30267500  | -19.44893200 |
| C  | -2.50864000 | 0.39125900  | -19.12957700 |
| C  | -1.95151300 | 0.33889400  | -17.81559900 |
| C  | -2.48354600 | 1.23894100  | -16.81517400 |
| H  | 0.20864000  | -4.88247800 | -18.89103600 |
| H  | 1.24250000  | -4.07152300 | -21.02352400 |
| H  | 1.99235900  | -2.21614500 | -22.43915200 |
| H  | 2.25482400  | 0.23170700  | -22.84943300 |
| H  | 1.37249300  | 1.87495500  | -21.17283500 |
| H  | 0.21038000  | 1.09348600  | -19.14283800 |
| H  | -0.70944200 | 0.11758400  | -14.08898100 |
| H  | -2.40673300 | 1.85483100  | -14.73053800 |
| H  | -3.88017900 | 2.85019900  | -16.41354900 |
| H  | -4.77886200 | 2.92645200  | -18.74038000 |
| H  | -3.91711600 | 1.31763000  | -20.45984900 |
| H  | -2.14880500 | -0.30398600 | -19.88611400 |
| C  | -1.38876000 | -4.08364300 | -13.29739800 |
| C  | -2.75463900 | -2.78040600 | -14.86699600 |
| C  | -2.44479100 | -5.19938000 | -13.35640600 |
| H  | -1.62651000 | -3.39803300 | -12.46368600 |
| H  | -0.39602400 | -4.52220500 | -13.14213000 |
| C  | -3.78652600 | -3.92365200 | -14.85906100 |
| H  | -3.02445900 | -2.03999500 | -14.09394700 |

|   |             |             |              |
|---|-------------|-------------|--------------|
| H | -2.74765800 | -2.28729800 | -15.84473300 |
| H | -2.17236600 | -5.86903000 | -14.19110100 |
| H | -3.52059100 | -4.62443000 | -15.67577100 |
| N | -1.41212200 | -3.31624300 | -14.55840500 |
| O | -3.74750900 | -4.62782300 | -13.60670500 |
| C | -5.20359000 | -3.39156800 | -15.04899500 |
| H | -5.28709500 | -2.87537800 | -16.01869900 |
| H | -5.92878300 | -4.21965100 | -15.02430500 |
| H | -5.45461700 | -2.67928200 | -14.24605400 |
| C | -2.51563300 | -5.98477300 | -12.05294900 |
| H | -3.34611000 | -6.70694300 | -12.09416900 |
| H | -1.57834900 | -6.54313500 | -11.91137100 |
| H | -2.67781800 | -5.31085000 | -11.19501800 |
| C | 3.58645300  | -5.33147600 | -14.09337500 |
| C | 3.84670100  | -4.25863400 | -14.96418200 |
| C | 3.26637000  | -2.95353400 | -14.77795300 |
| H | 4.30847100  | -4.48961700 | -15.92691300 |
| C | 1.39018100  | -8.47540700 | -15.78324900 |
| H | 0.40924400  | -8.54342700 | -16.27710800 |
| H | 1.73044800  | -9.47720000 | -15.47987900 |
| C | 2.40432900  | -7.74314700 | -16.59426800 |
| C | 2.01280500  | -6.70041500 | -17.46425800 |
| C | 3.78242600  | -8.02100600 | -16.45722800 |
| C | 2.96731400  | -5.97648900 | -18.19299200 |
| H | 0.95220200  | -6.47003700 | -17.56580900 |
| C | 4.74114300  | -7.28630500 | -17.17297900 |
| H | 4.09880800  | -8.82452300 | -15.78696000 |
| C | 4.33661100  | -6.26206600 | -18.04741800 |
| H | 2.64205500  | -5.18306600 | -18.86783700 |
| H | 5.80205900  | -7.51897700 | -17.05534200 |
| H | 5.07926400  | -5.69545400 | -18.61336300 |
| S | 0.94528300  | -7.58386100 | -14.12824800 |
| O | -0.22074600 | -8.40990700 | -13.61297900 |
| O | 0.36551500  | -6.21424900 | -14.74389900 |
| H | 3.91160400  | -6.32648300 | -14.39289100 |
| H | 3.36939800  | -5.19127900 | -13.03074100 |
| C | 3.38351200  | -1.97568400 | -15.90136100 |
| C | 3.35807400  | -2.41382700 | -17.24705300 |
| C | 3.51517400  | -0.59110700 | -15.65606200 |
| C | 3.48401900  | -1.50784300 | -18.30378600 |
| H | 3.19922300  | -3.47035300 | -17.45996600 |
| C | 3.63408700  | 0.32030800  | -16.71704000 |
| H | 3.52751500  | -0.21677400 | -14.63282100 |
| C | 3.62299400  | -0.13214400 | -18.04480500 |

|   |            |             |              |
|---|------------|-------------|--------------|
| H | 3.44648200 | -1.86800000 | -19.33207900 |
| H | 3.73358400 | 1.38641600  | -16.50113300 |
| H | 3.70315400 | 0.57547700  | -18.87152700 |
| C | 3.07186300 | -2.37988200 | -13.37982000 |
| H | 3.97252600 | -1.81033900 | -13.08729000 |
| H | 2.21600500 | -1.69081200 | -13.35950700 |
| H | 2.90887800 | -3.16651400 | -12.63302000 |

**IM6a'-exo-2**

|    |             |             |              |
|----|-------------|-------------|--------------|
| Pd | -0.19498800 | -6.98846700 | -14.15053600 |
| P  | -0.58890000 | -5.08838500 | -15.19991900 |
| O  | 0.11269200  | -4.89545400 | -16.70193800 |
| O  | 0.03080400  | -3.72061500 | -14.41641300 |
| C  | 2.05329200  | -3.49916200 | -16.40295000 |
| C  | 1.50778500  | -4.75518900 | -16.66604900 |
| C  | 2.28725500  | -5.90923500 | -16.91632600 |
| C  | 3.66554000  | -5.80225700 | -16.91453000 |
| C  | 5.71921200  | -4.45781100 | -16.57337500 |
| C  | 6.33633300  | -3.26758800 | -16.22411800 |
| C  | 5.54620900  | -2.12865700 | -15.90989000 |
| C  | 4.16116900  | -2.18720500 | -15.97173600 |
| C  | 3.49116400  | -3.38878400 | -16.35381800 |
| C  | 4.29785100  | -4.55669300 | -16.63234900 |
| C  | 1.14200500  | -2.36223700 | -16.09517600 |
| C  | 0.17407400  | -2.50939600 | -15.09514200 |
| C  | -0.66454100 | -1.44424000 | -14.67872600 |
| C  | -0.56876700 | -0.21416600 | -15.30149800 |
| C  | 0.39768200  | 1.22752600  | -17.07774100 |
| C  | 1.24698000  | 1.39979200  | -18.15969200 |
| C  | 2.06360900  | 0.32069700  | -18.59589400 |
| C  | 2.03733200  | -0.89971700 | -17.93636100 |
| C  | 1.19311800  | -1.10627800 | -16.80330800 |
| C  | 0.33720000  | -0.01811800 | -16.38505700 |
| H  | 1.77749100  | -6.85320300 | -17.10140500 |
| H  | 4.28896900  | -6.67804000 | -17.10183900 |
| H  | 6.30868000  | -5.35250600 | -16.78258900 |
| H  | 7.42499700  | -3.20739700 | -16.16953500 |
| H  | 6.03262700  | -1.19865000 | -15.60840100 |
| H  | 3.57216600  | -1.30995600 | -15.71132700 |
| H  | -1.37240700 | -1.62267000 | -13.86871900 |
| H  | -1.20276500 | 0.61688300  | -14.98554700 |
| H  | -0.25000300 | 2.04037400  | -16.74073800 |
| H  | 1.28250800  | 2.35619300  | -18.68505100 |
| H  | 2.71495500  | 0.45101200  | -19.46252800 |

|   |             |              |              |
|---|-------------|--------------|--------------|
| H | 2.66350400  | -1.71894100  | -18.28655900 |
| C | -3.24370600 | -5.29566800  | -14.70867200 |
| C | -2.62696000 | -3.67129700  | -16.45236500 |
| C | -4.50466900 | -5.63373200  | -15.52128000 |
| H | -3.49533200 | -4.51663800  | -13.96449600 |
| H | -2.88647200 | -6.19224100  | -14.17877000 |
| C | -3.89991800 | -4.07133500  | -17.21691600 |
| H | -2.85151400 | -2.79904800  | -15.81350300 |
| H | -1.83068600 | -3.40267100  | -17.15636200 |
| H | -4.26243500 | -6.46501400  | -16.21229500 |
| H | -3.64966500 | -4.91635400  | -17.88955900 |
| N | -2.18371200 | -4.80766800  | -15.61593900 |
| O | -4.92081100 | -4.49499900  | -16.29525600 |
| C | -4.45789100 | -2.89810400  | -18.01580900 |
| H | -3.72212500 | -2.56780900  | -18.76594700 |
| H | -5.38309900 | -3.19547500  | -18.53290200 |
| H | -4.68352300 | -2.05304300  | -17.34551200 |
| C | -5.66323600 | -6.02458100  | -14.60992700 |
| H | -6.56134000 | -6.24167500  | -15.20818800 |
| H | -5.39933300 | -6.92204400  | -14.02811500 |
| H | -5.89368100 | -5.20436200  | -13.91110700 |
| C | 3.08007700  | -4.10321300  | -12.90837500 |
| C | 3.20141300  | -5.60947600  | -12.98095600 |
| H | 3.52385600  | -3.73150800  | -11.96621100 |
| H | 3.62857500  | -3.62430700  | -13.73109900 |
| C | 2.15490700  | -6.45397900  | -12.69142300 |
| C | 0.76339700  | -6.10520800  | -12.45726200 |
| H | 2.36731800  | -7.52291400  | -12.63604400 |
| C | 4.52894500  | -6.16817700  | -13.31914700 |
| C | 5.71177900  | -5.41484300  | -13.11125100 |
| C | 4.66302600  | -7.45507300  | -13.90625100 |
| C | 6.97050000  | -5.93159800  | -13.44845400 |
| H | 5.64572800  | -4.41729700  | -12.67633400 |
| C | 5.92005400  | -7.96877100  | -14.24524600 |
| H | 3.76961800  | -8.04093500  | -14.12727900 |
| C | 7.08375800  | -7.21128400  | -14.01627500 |
| H | 7.86449600  | -5.32954900  | -13.27116300 |
| H | 5.99156900  | -8.95820700  | -14.70269500 |
| H | 8.06365700  | -7.61090900  | -14.28623900 |
| H | 0.26447400  | -6.70680500  | -11.68590500 |
| H | 0.51442300  | -5.04366900  | -12.39817800 |
| H | 2.03772000  | -3.76828500  | -12.94313700 |
| C | -0.05860900 | -10.66978400 | -14.98914700 |
| H | -0.98590600 | -10.97760900 | -14.48459900 |



|   |             |              |              |
|---|-------------|--------------|--------------|
| H | 0.51453100  | -11.55138500 | -15.31079400 |
| C | -0.27493600 | -9.69454700  | -16.08826400 |
| C | -1.33504800 | -8.75002800  | -16.03225300 |
| C | 0.61004000  | -9.64263800  | -17.18874800 |
| C | -1.51803800 | -7.81824300  | -17.07371300 |
| H | -2.06468900 | -8.81381900  | -15.22255300 |
| C | 0.41841900  | -8.71776300  | -18.22553000 |
| H | 1.43490300  | -10.35753500 | -17.23912600 |
| C | -0.64580000 | -7.80008700  | -18.17096300 |
| H | -2.33600600 | -7.10230300  | -17.01442000 |
| H | 1.10384000  | -8.70887800  | -19.07593400 |
| H | -0.78822600 | -7.07298700  | -18.97179000 |
| S | 0.97274100  | -9.90334100  | -13.53853100 |
| O | 1.01616900  | -11.01550800 | -12.51087600 |
| O | -0.09467100 | -8.79670900  | -13.07385300 |

**IM6b'-endo-1**

|    |             |             |              |
|----|-------------|-------------|--------------|
| C  | 1.53835400  | 1.27354300  | -3.19511700  |
| C  | 1.18708300  | 2.08408800  | -4.28997400  |
| C  | 0.27245700  | 1.64142300  | -5.30907500  |
| H  | 1.46278400  | 3.14080900  | -4.25768800  |
| Pd | -0.64558900 | 1.69491100  | -3.18759400  |
| P  | -2.88237700 | 2.02145500  | -3.67237600  |
| O  | -3.65470900 | 0.94471700  | -4.71596600  |
| O  | -3.04894100 | 3.46841000  | -4.52256700  |
| C  | -4.27239800 | 2.17161400  | -6.72732900  |
| C  | -3.66678000 | 1.07901200  | -6.09880600  |
| C  | -3.14608000 | -0.01963000 | -6.83052100  |
| C  | -3.14999500 | 0.00478300  | -8.21165100  |
| C  | -3.54982300 | 1.22887700  | -10.33406600 |
| C  | -3.97294700 | 2.36460200  | -11.00684000 |
| C  | -4.49289500 | 3.46633900  | -10.27328300 |
| C  | -4.60088800 | 3.41007800  | -8.89166700  |
| C  | -4.18748300 | 2.25211800  | -8.16605300  |
| C  | -3.63239800 | 1.14701800  | -8.91238800  |
| C  | -4.98691700 | 3.20984500  | -5.93296000  |
| C  | -4.33867800 | 3.85388000  | -4.87965700  |
| C  | -4.93182700 | 4.90359400  | -4.13420200  |
| C  | -6.22599700 | 5.29448200  | -4.42130200  |
| C  | -8.34094100 | 4.96880500  | -5.67873500  |
| C  | -9.08914200 | 4.28105700  | -6.62137800  |
| C  | -8.50011500 | 3.20726400  | -7.34297200  |
| C  | -7.17499200 | 2.85359700  | -7.13290600  |
| C  | -6.36593700 | 3.55453800  | -6.18732300  |

|   |              |             |              |
|---|--------------|-------------|--------------|
| C | -6.98036500  | 4.62131200  | -5.42728600  |
| H | -2.75649900  | -0.87331000 | -6.27751700  |
| H | -2.75713500  | -0.84023400 | -8.78093200  |
| H | -3.13172200  | 0.37921700  | -10.87918500 |
| H | -3.89891000  | 2.42069300  | -12.09470000 |
| H | -4.80372100  | 4.36991500  | -10.80173900 |
| H | -4.98666400  | 4.26837500  | -8.34416400  |
| H | -4.35019800  | 5.37718500  | -3.34267300  |
| H | -6.69731100  | 6.10502300  | -3.86157300  |
| H | -8.78307600  | 5.78355300  | -5.10040400  |
| H | -10.13132400 | 4.55179800  | -6.80188100  |
| H | -9.09787100  | 2.64972400  | -8.06702400  |
| H | -6.74410200  | 2.02222300  | -7.68806200  |
| C | -3.68413700  | 2.36892400  | -1.08654500  |
| C | -5.49196600  | 1.82469900  | -2.64617500  |
| C | -4.30871600  | 1.39639900  | -0.07731000  |
| H | -4.08948800  | 3.38233300  | -0.90619800  |
| H | -2.59261800  | 2.37549300  | -0.95797700  |
| C | -6.07013400  | 0.87031700  | -1.58606500  |
| H | -5.95397500  | 2.81968200  | -2.52650300  |
| H | -5.71432400  | 1.44852700  | -3.64995800  |
| H | -3.87946500  | 0.39121200  | -0.26159500  |
| H | -5.62450100  | -0.13251800 | -1.74863200  |
| N | -4.02851000  | 1.93912300  | -2.45713200  |
| O | -5.73589400  | 1.31817800  | -0.26082100  |
| C | -7.59115100  | 0.79890500  | -1.68074700  |
| H | -7.89119900  | 0.41287400  | -2.66791400  |
| H | -7.99042500  | 0.13078800  | -0.90196800  |
| H | -8.03004100  | 1.80060800  | -1.54479600  |
| C | -4.02837200  | 1.83043400  | 1.35692200   |
| H | -4.49697300  | 1.13145200  | 2.06745700   |
| H | -2.94076200  | 1.84747400  | 1.53341500   |
| H | -4.43325400  | 2.83973900  | 1.53752100   |
| C | -0.81896600  | -0.44496500 | -0.03695500  |
| H | -1.83185500  | -0.13793500 | 0.25900800   |
| H | -0.35293300  | -1.02436600 | 0.77448400   |
| C | -0.78572100  | -1.16756900 | -1.33888400  |
| C | 0.33900500   | -1.94133700 | -1.70663600  |
| C | -1.85942000  | -1.06855100 | -2.25337000  |
| C | 0.37673000   | -2.61839800 | -2.93466600  |
| H | 1.17819400   | -2.02509100 | -1.01131100  |
| C | -1.82840800  | -1.75625700 | -3.47777100  |
| H | -2.73471400  | -0.47614500 | -1.98451300  |
| C | -0.71330500  | -2.53699800 | -3.82119200  |

|   |             |             |             |
|---|-------------|-------------|-------------|
| H | 1.24994800  | -3.22087800 | -3.19537800 |
| H | -2.67995300 | -1.68089600 | -4.15513600 |
| H | -0.68888700 | -3.07387600 | -4.77183100 |
| S | 0.17103600  | 1.21101700  | -0.00949200 |
| O | -0.13042600 | 1.73484200  | 1.38509400  |
| O | -0.67348100 | 2.08306000  | -1.05636400 |
| H | 2.11433800  | 1.71705100  | -2.38231100 |
| H | 1.52999000  | 0.18142500  | -3.23896500 |
| C | -0.24285300 | 2.65934800  | -6.26848000 |
| C | -0.44467500 | 4.00207600  | -5.86646600 |
| C | -0.54123000 | 2.31594500  | -7.60746400 |
| C | -0.90933500 | 4.96431100  | -6.76789600 |
| H | -0.29137900 | 4.27205600  | -4.82129900 |
| C | -1.01193800 | 3.27947900  | -8.51081800 |
| H | -0.41123700 | 1.29091400  | -7.94971700 |
| C | -1.19577700 | 4.60766400  | -8.09764500 |
| H | -1.07306500 | 5.98871000  | -6.42647100 |
| H | -1.25102200 | 2.98590900  | -9.53381100 |
| H | -1.57844400 | 5.35222200  | -8.79850000 |
| C | 0.28527300  | 0.19300700  | -5.76313600 |
| H | -0.69988300 | -0.10493300 | -6.13780500 |
| H | 1.01021200  | 0.07922400  | -6.59001400 |
| H | 0.56914400  | -0.49030200 | -4.95683600 |

**IM6b<sup>1</sup>-endo-2**

|    |             |             |              |
|----|-------------|-------------|--------------|
| Pd | 0.83809200  | -5.67414600 | -14.65796200 |
| P  | -0.42427700 | -4.08556100 | -15.52413700 |
| O  | -0.27011100 | -3.84178000 | -17.16706700 |
| O  | -0.05316900 | -2.52690100 | -14.96507200 |
| C  | 1.15459100  | -1.92277300 | -17.45965900 |
| C  | 0.97204200  | -3.30307200 | -17.53733800 |
| C  | 1.97189800  | -4.20090600 | -17.98027500 |
| C  | 3.19096200  | -3.69446400 | -18.39389100 |
| C  | 4.71003400  | -1.76892500 | -18.76814700 |
| C  | 4.97835200  | -0.41236400 | -18.68745600 |
| C  | 4.00324900  | 0.47017100  | -18.14866600 |
| C  | 2.76952000  | -0.00668600 | -17.73052500 |
| C  | 2.43827300  | -1.39034200 | -17.84708100 |
| C  | 3.45216700  | -2.29357800 | -18.34772100 |
| C  | 0.05556300  | -1.08058800 | -16.91049100 |
| C  | -0.49602300 | -1.40405100 | -15.66546200 |
| C  | -1.48210900 | -0.60296300 | -15.03527600 |
| C  | -1.96403800 | 0.52177700  | -15.67840900 |
| C  | -2.05061600 | 1.97813300  | -17.68902500 |

|   |             |             |              |
|---|-------------|-------------|--------------|
| C | -1.64069200 | 2.27434000  | -18.97971900 |
| C | -0.67503300 | 1.45104600  | -19.62133200 |
| C | -0.11923700 | 0.36481200  | -18.96107200 |
| C | -0.49907800 | 0.04398200  | -17.62252600 |
| C | -1.50892300 | 0.86091800  | -16.98663200 |
| H | 1.75166100  | -5.26754600 | -17.99094100 |
| H | 3.97608600  | -4.36481300 | -18.74950500 |
| H | 5.46209900  | -2.46565200 | -19.14468800 |
| H | 5.94528700  | -0.02270000 | -19.01114900 |
| H | 4.22935600  | 1.53433600  | -18.05439600 |
| H | 2.03857000  | 0.68166700  | -17.31021300 |
| H | -1.84216800 | -0.89723900 | -14.04899800 |
| H | -2.71853500 | 1.15116100  | -15.20181800 |
| H | -2.80598500 | 2.58871000  | -17.18861700 |
| H | -2.06527200 | 3.12935600  | -19.50951800 |
| H | -0.37144200 | 1.67182100  | -20.64670100 |
| H | 0.61357500  | -0.26188400 | -19.46716900 |
| C | -2.63334700 | -5.06391400 | -14.28924400 |
| C | -3.07163600 | -3.45732200 | -16.10504800 |
| C | -3.87805000 | -5.84969300 | -14.73522000 |
| H | -2.92432800 | -4.35831700 | -13.48852300 |
| H | -1.87090300 | -5.75456500 | -13.89654000 |
| C | -4.29278800 | -4.30373000 | -16.50186200 |
| H | -3.39677600 | -2.65947800 | -15.41448100 |
| H | -2.62433100 | -2.99876200 | -16.99476700 |
| H | -3.56631400 | -6.60566700 | -15.48203000 |
| H | -3.96058900 | -5.06908700 | -17.23179400 |
| N | -2.07483200 | -4.32207400 | -15.43882500 |
| O | -4.83554300 | -4.96590000 | -15.34500300 |
| C | -5.39703000 | -3.43874100 | -17.10026900 |
| H | -5.03369100 | -2.94160300 | -18.01348700 |
| H | -6.26930900 | -4.05920700 | -17.35714600 |
| H | -5.71237100 | -2.66774900 | -16.37886100 |
| C | -4.55960200 | -6.52645200 | -13.55066000 |
| H | -5.45903000 | -7.06501500 | -13.88622800 |
| H | -3.87065100 | -7.24547900 | -13.07962000 |
| H | -4.85586000 | -5.77564700 | -12.80052400 |
| C | 4.68162100  | -5.27308000 | -13.34238000 |
| C | 4.15511400  | -4.00303800 | -13.97452000 |
| H | 5.15535300  | -5.91802300 | -14.09972100 |
| H | 5.46012600  | -5.04226400 | -12.59396400 |
| C | 2.82621200  | -3.65493200 | -13.93605800 |
| C | 1.75047600  | -4.36158500 | -13.25096100 |
| H | 2.51344500  | -2.76491200 | -14.48398500 |

|   |             |              |              |
|---|-------------|--------------|--------------|
| C | 5.14039500  | -3.11313500  | -14.63599700 |
| C | 6.35935700  | -3.62344500  | -15.15154500 |
| C | 4.91907300  | -1.71456000  | -14.74655300 |
| C | 7.29781000  | -2.78237000  | -15.76690800 |
| H | 6.57182100  | -4.69066800  | -15.08753500 |
| C | 5.86019000  | -0.87523100  | -15.35190200 |
| H | 4.01295800  | -1.27843800  | -14.32458900 |
| C | 7.05583700  | -1.40336500  | -15.86959900 |
| H | 8.22171500  | -3.20853000  | -16.16462600 |
| H | 5.66031000  | 0.19568400   | -15.41746300 |
| H | 7.78952100  | -0.74696400  | -16.34223800 |
| H | 2.04492600  | -5.07602700  | -12.47381700 |
| H | 0.93939100  | -3.70076000  | -12.92370300 |
| H | 3.88958300  | -5.86262300  | -12.86891500 |
| C | 1.71991300  | -9.24771900  | -15.51734100 |
| H | 1.09811600  | -9.69278200  | -14.72715900 |
| H | 2.36778400  | -10.00972600 | -15.97455100 |
| C | 0.94682200  | -8.47444800  | -16.52305900 |
| C | -0.27222500 | -7.83486100  | -16.17786300 |
| C | 1.44982600  | -8.29718600  | -17.83212500 |
| C | -0.97695000 | -7.07694500  | -17.13356100 |
| H | -0.70080700 | -8.00294300  | -15.18766900 |
| C | 0.74060200  | -7.54721000  | -18.78145800 |
| H | 2.39189100  | -8.77739200  | -18.10735200 |
| C | -0.47624700 | -6.93319600  | -18.43484900 |
| H | -1.90845500 | -6.59054300  | -16.85030800 |
| H | 1.13968500  | -7.43718200  | -19.79222300 |
| H | -1.02324600 | -6.34036200  | -19.16964500 |
| S | 2.92496200  | -8.09257300  | -14.54089600 |
| O | 3.64216700  | -9.03196900  | -13.59344000 |
| O | 1.81609600  | -7.27105500  | -13.71194400 |

**E-TS5a**

|    |             |             |              |
|----|-------------|-------------|--------------|
| Pd | 1.52455600  | -4.56086000 | -14.96886500 |
| P  | -0.07854900 | -3.21536400 | -15.65406100 |
| O  | -0.72444900 | -3.28185900 | -17.23433300 |
| O  | 0.38191200  | -1.58787700 | -15.61792600 |
| C  | -0.15301400 | -1.21966600 | -18.37491100 |
| C  | -0.14045900 | -2.61677700 | -18.30142200 |
| C  | 0.36544400  | -3.42283200 | -19.35488500 |
| C  | 0.91762500  | -2.83037600 | -20.47391400 |
| C  | 1.71879400  | -0.79428700 | -21.64797500 |
| C  | 1.89542000  | 0.58036400  | -21.68964800 |
| C  | 1.40212200  | 1.38770700  | -20.62774200 |

|   |             |             |              |
|---|-------------|-------------|--------------|
| C | 0.73039400  | 0.81601600  | -19.55728900 |
| C | 0.52134700  | -0.59452100 | -19.48612900 |
| C | 1.04553900  | -1.41372600 | -20.55410700 |
| C | -0.85014700 | -0.42042300 | -17.32917000 |
| C | -0.54528500 | -0.61981900 | -15.98106000 |
| C | -1.14068100 | 0.13485700  | -14.93808200 |
| C | -2.08813200 | 1.09332900  | -15.24447600 |
| C | -3.52121900 | 2.24533900  | -16.91128900 |
| C | -3.95595900 | 2.41337000  | -18.21657200 |
| C | -3.38721400 | 1.62696200  | -19.25547600 |
| C | -2.38300700 | 0.70939100  | -18.98248700 |
| C | -1.88971300 | 0.52762700  | -17.65400600 |
| C | -2.49955500 | 1.30149100  | -16.59383200 |
| H | 0.29547200  | -4.50495800 | -19.26113900 |
| H | 1.29884000  | -3.44316000 | -21.29380500 |
| H | 2.10641100  | -1.43156300 | -22.44662300 |
| H | 2.41937800  | 1.04363100  | -22.52812900 |
| H | 1.56048100  | 2.46793500  | -20.65071600 |
| H | 0.37067700  | 1.44476000  | -18.74416800 |
| H | -0.83549900 | -0.06219600 | -13.91004600 |
| H | -2.55172600 | 1.68745200  | -14.45402300 |
| H | -3.96102900 | 2.82580900  | -16.09671500 |
| H | -4.74141900 | 3.13580900  | -18.44727100 |
| H | -3.74822300 | 1.74086400  | -20.27977900 |
| H | -1.96738300 | 0.10960400  | -19.79012000 |
| C | -1.68386300 | -4.31378400 | -13.73353700 |
| C | -2.84701500 | -2.87277300 | -15.32177100 |
| C | -2.52457300 | -5.50154700 | -14.22773800 |
| H | -2.20022500 | -3.83232800 | -12.88424100 |
| H | -0.69833600 | -4.66343700 | -13.39839000 |
| C | -3.68209800 | -4.08762300 | -15.76841000 |
| H | -3.37375800 | -2.34583900 | -14.50738300 |
| H | -2.71312700 | -2.18349400 | -16.16138700 |
| H | -1.97862300 | -5.96659200 | -15.07577200 |
| H | -3.15130000 | -4.56745900 | -16.61423700 |
| N | -1.53358000 | -3.31601600 | -14.80894000 |
| O | -3.80614300 | -5.04209600 | -14.69669600 |
| C | -5.09046400 | -3.67693700 | -16.18543100 |
| H | -5.04150400 | -2.97474600 | -17.03297300 |
| H | -5.67440800 | -4.55967200 | -16.48926700 |
| H | -5.60869400 | -3.18330600 | -15.34723300 |
| C | -2.76634600 | -6.52754500 | -13.12668700 |
| H | -3.39123400 | -7.35349900 | -13.50086500 |
| H | -1.80290000 | -6.93574500 | -12.78250800 |

|   |             |             |              |
|---|-------------|-------------|--------------|
| H | -3.27825600 | -6.05875400 | -12.27056800 |
| C | 4.40818800  | -5.21276100 | -13.69297700 |
| C | 3.95764400  | -4.51457300 | -14.81366700 |
| C | 3.27987600  | -3.23553300 | -14.81650600 |
| H | 4.21424200  | -4.94476200 | -15.78310200 |
| C | 2.44726200  | -8.22921100 | -14.29047900 |
| H | 1.53640400  | -8.76430500 | -13.98337400 |
| H | 3.32740300  | -8.87346100 | -14.15442900 |
| C | 2.35361600  | -7.65061500 | -15.65942300 |
| C | 1.12463700  | -7.12943000 | -16.13574900 |
| C | 3.49422800  | -7.55879300 | -16.48817200 |
| C | 1.04279200  | -6.54745500 | -17.41475200 |
| H | 0.23145400  | -7.21702800 | -15.51617900 |
| C | 3.41031100  | -6.97634700 | -17.76030400 |
| H | 4.44658700  | -7.95433100 | -16.12735700 |
| C | 2.18417500  | -6.46701000 | -18.22778800 |
| H | 0.08638600  | -6.15365300 | -17.75960600 |
| H | 4.30034200  | -6.92025000 | -18.39083400 |
| H | 2.12168500  | -6.00868500 | -19.21619400 |
| S | 2.60532300  | -6.89852500 | -12.90052500 |
| O | 2.58593900  | -7.70541000 | -11.62280500 |
| O | 1.35482100  | -6.01893200 | -13.13612300 |
| H | 5.10342200  | -6.04091900 | -13.83254200 |
| H | 4.38063800  | -4.76575400 | -12.69876500 |
| C | 3.41679400  | -2.40632400 | -16.05616500 |
| C | 3.41517900  | -3.00523800 | -17.34054400 |
| C | 3.56236200  | -1.00219700 | -15.98290900 |
| C | 3.57866700  | -2.23621800 | -18.49565400 |
| H | 3.23764900  | -4.07702400 | -17.43308400 |
| C | 3.71005000  | -0.22923200 | -17.14466300 |
| H | 3.55777000  | -0.50380800 | -15.01426700 |
| C | 3.72333800  | -0.84034000 | -18.40722200 |
| H | 3.55806400  | -2.72139000 | -19.47167200 |
| H | 3.80868600  | 0.85530200  | -17.05972800 |
| H | 3.81819400  | -0.23970200 | -19.31292100 |
| C | 3.11974100  | -2.48445800 | -13.49950600 |
| H | 4.05084300  | -1.94323100 | -13.24765100 |
| H | 2.30675400  | -1.75101900 | -13.58025600 |
| H | 2.88558800  | -3.17337500 | -12.67765300 |

**E-TS5b**

|   |            |            |             |
|---|------------|------------|-------------|
| C | 2.03919900 | 1.32659300 | -3.20537500 |
| C | 1.18921000 | 2.20554300 | -3.90408000 |
| C | 0.19838800 | 1.83511800 | -4.88512500 |

|    |              |             |              |
|----|--------------|-------------|--------------|
| H  | 1.37649900   | 3.27100900  | -3.76008100  |
| Pd | -1.04125400  | 1.88113600  | -3.06107500  |
| P  | -3.16131200  | 2.06514800  | -3.63434100  |
| O  | -4.02466200  | 0.98957100  | -4.62826100  |
| O  | -3.40997200  | 3.50137000  | -4.50965500  |
| C  | -4.37758400  | 2.07429700  | -6.76275900  |
| C  | -3.84083800  | 1.03008000  | -6.00383000  |
| C  | -3.16931500  | -0.07112600 | -6.59357200  |
| C  | -2.96487500  | -0.09962200 | -7.96048800  |
| C  | -3.09745000  | 1.01683000  | -10.17422500 |
| C  | -3.46515000  | 2.10073400  | -10.95653400 |
| C  | -4.13828800  | 3.20395300  | -10.36283100 |
| C  | -4.44719100  | 3.20021400  | -9.01079200  |
| C  | -4.09676100  | 2.09539900  | -8.17700500  |
| C  | -3.38886600  | 0.98794500  | -8.77810900  |
| C  | -5.18912100  | 3.13217800  | -6.09952100  |
| C  | -4.66690100  | 3.81978300  | -5.00126900  |
| C  | -5.35947900  | 4.88424000  | -4.36730000  |
| C  | -6.61693000  | 5.24553000  | -4.81164500  |
| C  | -8.56652900  | 4.85360200  | -6.29868200  |
| C  | -9.19087100  | 4.12914000  | -7.30221100  |
| C  | -8.50958400  | 3.04231700  | -7.91518200  |
| C  | -7.21641600  | 2.71154700  | -7.53618800  |
| C  | -6.53202300  | 3.45012900  | -6.52325800  |
| C  | -7.24255600  | 4.53192600  | -5.87639600  |
| H  | -2.82233400  | -0.87442500 | -5.94380000  |
| H  | -2.44919000  | -0.94215000 | -8.42632300  |
| H  | -2.56614900  | 0.16787700  | -10.61123100 |
| H  | -3.23147500  | 2.11489600  | -12.02300300 |
| H  | -4.40725900  | 4.06716900  | -10.97508800 |
| H  | -4.94700600  | 4.05958400  | -8.56693600  |
| H  | -4.87739600  | 5.39485500  | -3.53282900  |
| H  | -7.15813500  | 6.06698200  | -4.33716500  |
| H  | -9.08199700  | 5.67988300  | -5.80331400  |
| H  | -10.20642300 | 4.38151500  | -7.61383400  |
| H  | -9.01052600  | 2.45653400  | -8.68879800  |
| H  | -6.71414800  | 1.86922500  | -8.00876600  |
| C  | -3.78414000  | 2.26305900  | -0.97623600  |
| C  | -5.71876800  | 2.06376300  | -2.46024800  |
| C  | -4.45623400  | 1.26682400  | -0.01753600  |
| H  | -4.05106900  | 3.29228700  | -0.66974000  |
| H  | -2.69223900  | 2.14839100  | -0.91847500  |
| C  | -6.34711000  | 1.08070900  | -1.45644100  |
| H  | -6.07130900  | 3.08549100  | -2.23151400  |



|   |             |             |             |
|---|-------------|-------------|-------------|
| H | -6.02385900 | 1.80243100  | -3.47934000 |
| H | -4.14368500 | 0.24512900  | -0.31391200 |
| H | -6.03020600 | 0.05566900  | -1.73746800 |
| N | -4.24781700 | 2.01115000  | -2.35115700 |
| O | -5.88843900 | 1.35935800  | -0.12088500 |
| C | -7.86874600 | 1.18676800  | -1.45173100 |
| H | -8.26721400 | 0.93918400  | -2.44840600 |
| H | -8.29834900 | 0.49068600  | -0.71470800 |
| H | -8.17892800 | 2.21179200  | -1.19165300 |
| C | -4.07245200 | 1.53783300  | 1.43309500  |
| H | -4.58120000 | 0.82731600  | 2.10285200  |
| H | -2.98343600 | 1.42774900  | 1.55956800  |
| H | -4.35935000 | 2.56198200  | 1.72177100  |
| C | 0.54282300  | -0.71390800 | -0.53832400 |
| H | -0.01896400 | -0.58709900 | 0.39939200  |
| H | 1.45284800  | -1.30129400 | -0.35207900 |
| C | -0.28727400 | -1.27763500 | -1.64448000 |
| C | 0.27374400  | -2.18591300 | -2.56921800 |
| C | -1.64269700 | -0.90620500 | -1.79434500 |
| C | -0.50639400 | -2.73226000 | -3.59948500 |
| H | 1.32185500  | -2.47613300 | -2.46185900 |
| C | -2.42234900 | -1.44909100 | -2.82798000 |
| H | -2.08479500 | -0.20425900 | -1.08802000 |
| C | -1.85811300 | -2.36632900 | -3.72950100 |
| H | -0.06113000 | -3.44317800 | -4.29881200 |
| H | -3.46384100 | -1.14416800 | -2.93221000 |
| H | -2.46776800 | -2.79482700 | -4.52781700 |
| S | 1.18872200  | 1.06119900  | -0.85474900 |
| O | 2.04271300  | 1.36702400  | 0.35003700  |
| O | -0.11021000 | 1.89684900  | -0.95596300 |
| H | 2.95476800  | 1.72824900  | -2.76917200 |
| H | 2.04234000  | 0.25692300  | -3.42060000 |
| C | -0.26643800 | 2.88038100  | -5.85014800 |
| C | -0.42000800 | 4.23196900  | -5.45257100 |
| C | -0.59177700 | 2.54354500  | -7.18453400 |
| C | -0.87926700 | 5.20118800  | -6.34864600 |
| H | -0.22798200 | 4.50768000  | -4.41492600 |
| C | -1.05945500 | 3.51444700  | -8.08253000 |
| H | -0.49210400 | 1.51562700  | -7.52794100 |
| C | -1.20690400 | 4.84715300  | -7.67088800 |
| H | -1.00464500 | 6.23209300  | -6.00992500 |
| H | -1.32402500 | 3.22090200  | -9.09942600 |
| H | -1.58596000 | 5.59903100  | -8.36626900 |
| C | 0.16713100  | 0.38821600  | -5.35967100 |

|   |             |             |             |
|---|-------------|-------------|-------------|
| H | -0.78920100 | 0.15612700  | -5.83949700 |
| H | 0.97363300  | 0.21223700  | -6.09599900 |
| H | 0.30583300  | -0.30613100 | -4.52250900 |

**(R)-TS6**

|    |             |             |              |
|----|-------------|-------------|--------------|
| Pd | 1.39739600  | -4.45440900 | -15.02155600 |
| P  | -0.33945400 | -3.26315100 | -15.58325200 |
| O  | -0.46670300 | -2.81970300 | -17.22119500 |
| O  | -0.33498500 | -1.68580500 | -14.90662300 |
| C  | 0.35799600  | -0.56746400 | -17.41337200 |
| C  | 0.50713000  | -1.93352100 | -17.66539600 |
| C  | 1.60883000  | -2.46812100 | -18.37992200 |
| C  | 2.59046800  | -1.61696400 | -18.85425400 |
| C  | 3.55536300  | 0.66443600  | -19.04055200 |
| C  | 3.51365700  | 2.01819700  | -18.74556700 |
| C  | 2.43665700  | 2.54164900  | -17.97854500 |
| C  | 1.41173200  | 1.71549800  | -17.54059800 |
| C  | 1.40618900  | 0.32104100  | -17.84923900 |
| C  | 2.52374500  | -0.21555800 | -18.59644100 |
| C  | -0.84416000 | -0.10378800 | -16.66507300 |
| C  | -1.14537000 | -0.68846700 | -15.42870600 |
| C  | -2.25014300 | -0.26949300 | -14.64093000 |
| C  | -3.08771000 | 0.72725200  | -15.10510200 |
| C  | -3.76830900 | 2.30333400  | -16.90027600 |
| C  | -3.58594500 | 2.84036800  | -18.16527600 |
| C  | -2.50107600 | 2.39704400  | -18.97051600 |
| C  | -1.60849800 | 1.44664500  | -18.49604500 |
| C  | -1.74980000 | 0.88903100  | -17.18843800 |
| C  | -2.87546800 | 1.31649600  | -16.38631900 |
| H  | 1.65765300  | -3.54646700 | -18.52777000 |
| H  | 3.44203800  | -2.01000700 | -19.41439900 |
| H  | 4.38633100  | 0.24264600  | -19.61119200 |
| H  | 4.31054200  | 2.68124700  | -19.08844000 |
| H  | 2.41832300  | 3.60389000  | -17.72610400 |
| H  | 0.59812300  | 2.12850800  | -16.94626500 |
| H  | -2.41403800 | -0.75097800 | -13.67611700 |
| H  | -3.93667800 | 1.06177600  | -14.50484200 |
| H  | -4.60735500 | 2.61898700  | -16.27542800 |
| H  | -4.27820300 | 3.59219000  | -18.54962500 |
| H  | -2.37165000 | 2.80376100  | -19.97569100 |
| H  | -0.78826200 | 1.11089800  | -19.12875300 |
| C  | -2.12885100 | -5.03895600 | -14.53615900 |
| C  | -3.12553000 | -3.34487300 | -16.00083000 |
| C  | -2.91717400 | -6.11965000 | -15.29492000 |

|   |             |             |              |
|---|-------------|-------------|--------------|
| H | -2.71895000 | -4.71513800 | -13.65812500 |
| H | -1.16692400 | -5.44550700 | -14.18773000 |
| C | -3.89610100 | -4.46880400 | -16.71841200 |
| H | -3.75679200 | -2.93127200 | -15.19352300 |
| H | -2.88404000 | -2.54595900 | -16.71048500 |
| H | -2.28987600 | -6.46864500 | -16.14016700 |
| H | -3.26888400 | -4.82540700 | -17.56055400 |
| N | -1.88566600 | -3.89114200 | -15.42263800 |
| O | -4.13872200 | -5.56779000 | -15.82071000 |
| C | -5.25012200 | -3.98470900 | -17.22711300 |
| H | -5.11053700 | -3.16910400 | -17.95427200 |
| H | -5.79198500 | -4.80834900 | -17.71732300 |
| H | -5.86045700 | -3.61057900 | -16.38912600 |
| C | -3.29031500 | -7.28736900 | -14.38789300 |
| H | -3.87831200 | -8.03301000 | -14.94517300 |
| H | -2.37877200 | -7.77092300 | -14.00143300 |
| H | -3.88987900 | -6.93139700 | -13.53448500 |
| C | 4.56183500  | -4.54865800 | -12.96933100 |
| C | 4.50452300  | -5.15968100 | -14.36258300 |
| H | 4.94071500  | -5.25472100 | -12.21950900 |
| H | 5.23927000  | -3.67771600 | -12.99105000 |
| C | 3.77201600  | -4.41053200 | -15.36901200 |
| C | 3.13211800  | -3.16669400 | -15.18173200 |
| H | 3.82141500  | -4.78517200 | -16.39148700 |
| C | 5.70729400  | -5.94377600 | -14.80654100 |
| C | 6.36138500  | -6.82813300 | -13.91187200 |
| C | 6.24227900  | -5.81531400 | -16.11200200 |
| C | 7.48241300  | -7.56623700 | -14.31177000 |
| H | 5.96713600  | -6.96987400 | -12.90706500 |
| C | 7.36786500  | -6.55222700 | -16.51005100 |
| H | 5.79860500  | -5.11775300 | -16.82051100 |
| C | 7.99179600  | -7.43552800 | -15.61521500 |
| H | 7.95685700  | -8.24770300 | -13.60265700 |
| H | 7.76039400  | -6.42603400 | -17.52130500 |
| H | 8.86727800  | -8.00936000 | -15.92579700 |
| H | 3.23148700  | -2.62858300 | -14.23349900 |
| H | 2.97376400  | -2.53431800 | -16.05864700 |
| H | 3.56463100  | -4.20494200 | -12.65873300 |
| C | 2.94421100  | -8.04351900 | -15.33236800 |
| H | 2.32316400  | -8.87074000 | -14.95637400 |
| H | 3.96851700  | -8.40077600 | -15.50552700 |
| C | 2.35372800  | -7.37191600 | -16.53208300 |
| C | 0.97194200  | -7.07731600 | -16.58832400 |
| C | 3.17064800  | -7.02936500 | -17.63006600 |

|   |             |             |              |
|---|-------------|-------------|--------------|
| C | 0.42384500  | -6.45772100 | -17.72334700 |
| H | 0.33189600  | -7.34766300 | -15.74827900 |
| C | 2.62082500  | -6.41638100 | -18.76504600 |
| H | 4.23886300  | -7.25007600 | -17.58581200 |
| C | 1.24417000  | -6.13058600 | -18.81523600 |
| H | -0.64355600 | -6.23329500 | -17.75273800 |
| H | 3.26341400  | -6.16581300 | -19.61197600 |
| H | 0.81384300  | -5.65661000 | -19.69961600 |
| S | 3.08695500  | -6.94472100 | -13.79252700 |
| O | 3.52495000  | -7.86836700 | -12.68976600 |
| O | 1.71032900  | -6.29239000 | -13.61408500 |

(S)-TS6

|    |             |            |             |
|----|-------------|------------|-------------|
| C  | 1.98626100  | 1.16793700 | -4.76031500 |
| C  | 1.10757700  | 2.21615400 | -4.28051200 |
| C  | 0.00816000  | 2.76231000 | -4.98550200 |
| H  | 1.40339200  | 2.71921700 | -3.35948000 |
| H  | -0.18835800 | 2.46249700 | -6.01924500 |
| H  | -0.29926900 | 3.78184700 | -4.73799900 |
| Pd | -1.04023900 | 1.43146500 | -3.65736500 |
| P  | -3.13302100 | 2.07155600 | -3.57689500 |
| O  | -3.51578500 | 3.73406500 | -3.67166900 |
| O  | -3.87117900 | 1.74270600 | -2.06642600 |
| C  | -3.93629900 | 4.49526800 | -1.42443400 |
| C  | -3.14985600 | 4.51097200 | -2.58056700 |
| C  | -1.99780900 | 5.32863100 | -2.70640400 |
| C  | -1.60169100 | 6.12316700 | -1.64673300 |
| C  | -1.86795900 | 6.84845900 | 0.71393600  |
| C  | -2.53140500 | 6.77404000 | 1.92899200  |
| C  | -3.66943400 | 5.93190600 | 2.06289200  |
| C  | -4.13619900 | 5.19501800 | 0.98405300  |
| C  | -3.48896000 | 5.25948100 | -0.28729100 |
| C  | -2.31394500 | 6.09415100 | -0.41212600 |
| C  | -5.17348900 | 3.66644400 | -1.40380700 |
| C  | -5.09401600 | 2.30987800 | -1.73560500 |
| C  | -6.22497500 | 1.45225700 | -1.71425700 |
| C  | -7.46503700 | 1.96197600 | -1.37787400 |
| C  | -8.91251600 | 3.89428000 | -0.79738200 |
| C  | -9.07552500 | 5.25120600 | -0.56544200 |
| C  | -7.94986500 | 6.11773700 | -0.62737500 |
| C  | -6.68368900 | 5.61776000 | -0.89573100 |
| C  | -6.47299200 | 4.22211000 | -1.11579000 |
| C  | -7.62666100 | 3.34904500 | -1.08828100 |
| H  | -1.45206100 | 5.32065100 | -3.64936600 |

|   |              |             |             |
|---|--------------|-------------|-------------|
| H | -0.72053000  | 6.76258000  | -1.73290200 |
| H | -0.98233200  | 7.47815900  | 0.59868000  |
| H | -2.17749700  | 7.35095300  | 2.78575300  |
| H | -4.17771900  | 5.85848500  | 3.02651800  |
| H | -5.00382000  | 4.54756500  | 1.10320100  |
| H | -6.08659600  | 0.40056300  | -1.96695100 |
| H | -8.34238600  | 1.31200200  | -1.35034700 |
| H | -9.76923100  | 3.21642400  | -0.77300400 |
| H | -10.06509900 | 5.65836900  | -0.34828900 |
| H | -8.08313100  | 7.18988400  | -0.46811800 |
| H | -5.83496800  | 6.29759000  | -0.95103900 |
| C | -3.68912100  | 0.63223800  | -5.82001800 |
| C | -5.47017600  | 2.15976100  | -5.12724400 |
| C | -3.56378800  | 1.41180900  | -7.13890000 |
| H | -4.40423100  | -0.19850500 | -5.95604300 |
| H | -2.71233400  | 0.21823500  | -5.52738800 |
| C | -5.31670100  | 2.89731200  | -6.47145100 |
| H | -6.23993700  | 1.37419300  | -5.22638400 |
| H | -5.77828700  | 2.86266400  | -4.34549200 |
| H | -2.82312500  | 2.22336500  | -6.98036000 |
| H | -4.57448200  | 3.70683800  | -6.32690200 |
| N | -4.19416600  | 1.51739600  | -4.75601100 |
| O | -4.83179500  | 1.99857700  | -7.48803100 |
| C | -6.64449400  | 3.46796600  | -6.95833300 |
| H | -7.02968600  | 4.19917000  | -6.22987900 |
| H | -6.51320600  | 3.97074600  | -7.92918500 |
| H | -7.38691300  | 2.66194600  | -7.07661800 |
| C | -3.13323200  | 0.51456600  | -8.29406400 |
| H | -3.08249300  | 1.09107600  | -9.23084600 |
| H | -2.13906100  | 0.08681800  | -8.08619700 |
| H | -3.85213700  | -0.31026800 | -8.42652400 |
| C | 1.61548900   | -0.50766800 | -1.68469000 |
| H | 2.70625300   | -0.57821400 | -1.57602600 |
| H | 1.13695900   | -1.39292900 | -1.23892900 |
| C | 1.06614000   | 0.78245600  | -1.16704500 |
| C | -0.32092200  | 0.94499300  | -0.93560200 |
| C | 1.92934300   | 1.87261400  | -0.92674400 |
| C | -0.82600400  | 2.17612400  | -0.47534300 |
| H | -0.99582800  | 0.10038900  | -1.08323200 |
| C | 1.42426900   | 3.09517200  | -0.46327000 |
| H | 2.99847200   | 1.75418400  | -1.11230400 |
| C | 0.04383600   | 3.25169500  | -0.23871300 |
| H | -1.89799700  | 2.28874400  | -0.31756600 |
| H | 2.10744400   | 3.92646300  | -0.27395600 |

|   |             |             |             |
|---|-------------|-------------|-------------|
| H | -0.35119500 | 4.20211300  | 0.12120300  |
| S | 1.30751700  | -0.80424600 | -3.54257800 |
| O | -0.21926300 | -0.77915000 | -3.69774000 |
| O | 1.97465500  | -2.12027700 | -3.84471700 |
| C | 3.42963700  | 1.21061900  | -4.35971800 |
| C | 4.00033800  | 2.35767900  | -3.75455200 |
| C | 4.28193700  | 0.10545100  | -4.61107800 |
| C | 5.35780000  | 2.39058500  | -3.40219200 |
| H | 3.39219300  | 3.24334000  | -3.57688700 |
| C | 5.63522500  | 0.13773000  | -4.25381200 |
| H | 3.87260400  | -0.80243000 | -5.05122000 |
| C | 6.18240300  | 1.28080200  | -3.64515500 |
| H | 5.77043000  | 3.29164500  | -2.94346100 |
| H | 6.26273900  | -0.73439000 | -4.44872100 |
| H | 7.23852300  | 1.30699300  | -3.36930300 |
| C | 1.66559700  | 0.57623600  | -6.12432300 |
| H | 1.91242100  | 1.32206700  | -6.90010300 |
| H | 2.24498300  | -0.33222100 | -6.33325000 |
| H | 0.59459100  | 0.33840500  | -6.19999900 |

**E-IM7a**

|    |             |             |              |
|----|-------------|-------------|--------------|
| Pd | 1.53198400  | -4.48594000 | -15.53688600 |
| P  | -0.27110400 | -3.20186500 | -15.79637700 |
| O  | -1.06478300 | -3.12958100 | -17.31494800 |
| O  | 0.09946800  | -1.54174400 | -15.64380400 |
| C  | -0.26896400 | -1.13855700 | -18.41940100 |
| C  | -0.35129600 | -2.53231600 | -18.34686200 |
| C  | 0.23147800  | -3.37948900 | -19.32399000 |
| C  | 0.93917600  | -2.82873700 | -20.37617500 |
| C  | 1.92822500  | -0.84422400 | -21.49542200 |
| C  | 2.15909400  | 0.52220800  | -21.54086500 |
| C  | 1.60376200  | 1.36688400  | -20.54026400 |
| C  | 0.81445400  | 0.83981200  | -19.52867400 |
| C  | 0.53838700  | -0.55906000 | -19.46237500 |
| C  | 1.13239600  | -1.41930700 | -20.46086000 |
| C  | -0.99655000 | -0.31792200 | -17.41177000 |
| C  | -0.79156000 | -0.56234000 | -16.04948000 |
| C  | -1.43628000 | 0.19302300  | -15.03461600 |
| C  | -2.32103600 | 1.19614800  | -15.38286400 |
| C  | -3.57396100 | 2.45336400  | -17.11930300 |
| C  | -3.90060800 | 2.67322500  | -18.44845600 |
| C  | -3.28752700 | 1.88908400  | -19.46377700 |
| C  | -2.34794100 | 0.92024900  | -19.14171100 |
| C  | -1.96632400 | 0.68275000  | -17.78546500 |

|   |             |             |              |
|---|-------------|-------------|--------------|
| C | -2.62046800 | 1.45737900  | -16.75260500 |
| H | 0.09654500  | -4.45563200 | -19.22815100 |
| H | 1.38451800  | -3.46967300 | -21.14041700 |
| H | 2.36351100  | -1.50878400 | -22.24588700 |
| H | 2.77426100  | 0.95055300  | -22.33493600 |
| H | 1.80660200  | 2.43963900  | -20.56374500 |
| H | 0.40429300  | 1.49455600  | -18.76109000 |
| H | -1.21456400 | -0.03941500 | -13.99246000 |
| H | -2.81827000 | 1.78899500  | -14.61192100 |
| H | -4.04935800 | 3.03300000  | -16.32418800 |
| H | -4.63452800 | 3.43580700  | -18.71694900 |
| H | -3.56273800 | 2.04589000  | -20.50895500 |
| H | -1.89711800 | 0.32250400  | -19.93209900 |
| C | -1.58210600 | -4.56868400 | -13.85105200 |
| C | -2.99571300 | -3.03281400 | -15.13048200 |
| C | -2.44925000 | -5.74052500 | -14.33697000 |
| H | -1.98136100 | -4.19923400 | -12.88931200 |
| H | -0.54419300 | -4.89766500 | -13.69904600 |
| C | -3.83705900 | -4.24153500 | -15.58566300 |
| H | -3.43922200 | -2.60267800 | -14.21485900 |
| H | -2.98401800 | -2.26720400 | -15.91459100 |
| H | -2.00673400 | -6.11772800 | -15.28308000 |
| H | -3.39556500 | -4.61960800 | -16.52914400 |
| N | -1.62023300 | -3.46832500 | -14.82933900 |
| O | -3.79208600 | -5.29091500 | -14.59890800 |
| C | -5.30146700 | -3.86850800 | -15.79046500 |
| H | -5.38738700 | -3.09731900 | -16.57245700 |
| H | -5.88368100 | -4.75132200 | -16.09753400 |
| H | -5.72919700 | -3.47278700 | -14.85489900 |
| C | -2.52875200 | -6.85939600 | -13.30392000 |
| H | -3.16489100 | -7.67955300 | -13.67173800 |
| H | -1.52146500 | -7.25450300 | -13.09681600 |
| H | -2.95490900 | -6.47827000 | -12.36183500 |
| C | 4.07595700  | -5.47407900 | -13.76224300 |
| C | 3.69330500  | -4.68108700 | -14.98494500 |
| C | 3.32657200  | -3.30910800 | -14.94307200 |
| H | 4.13476500  | -5.07790600 | -15.90213400 |
| C | 2.49699900  | -7.96724700 | -14.10016800 |
| H | 1.62469500  | -8.46874300 | -13.65346000 |
| H | 3.38315000  | -8.60977600 | -14.00677400 |
| C | 2.26479900  | -7.51495900 | -15.50777300 |
| C | 1.03285500  | -6.90279500 | -15.86483400 |
| C | 3.28620100  | -7.62659700 | -16.46725500 |
| C | 0.85266500  | -6.39192600 | -17.17122000 |

|   |             |             |              |
|---|-------------|-------------|--------------|
| H | 0.20132200  | -6.91111900 | -15.15925600 |
| C | 3.10242400  | -7.11935200 | -17.76522600 |
| H | 4.23018900  | -8.10046900 | -16.19004200 |
| C | 1.89846100  | -6.49246300 | -18.11593900 |
| H | -0.11225100 | -5.97686000 | -17.46058800 |
| H | 3.90386700  | -7.21165800 | -18.50101500 |
| H | 1.76060400  | -6.08865600 | -19.11969600 |
| S | 2.80390200  | -6.55672100 | -12.90925200 |
| O | 3.46584300  | -7.13688100 | -11.70674700 |
| O | 1.52606200  | -5.80911300 | -12.72354200 |
| H | 4.88219800  | -6.18683800 | -13.98797000 |
| H | 4.40193300  | -4.84507900 | -12.91997000 |
| C | 3.59229200  | -2.42338200 | -16.12771800 |
| C | 3.68564600  | -2.94502600 | -17.44495600 |
| C | 3.74987800  | -1.02705400 | -15.96843900 |
| C | 3.91753100  | -2.11090400 | -18.54230600 |
| H | 3.52247100  | -4.01024100 | -17.61145100 |
| C | 3.97920200  | -0.18917200 | -17.07299600 |
| H | 3.68655500  | -0.58159100 | -14.97615400 |
| C | 4.06228500  | -0.72210500 | -18.36670100 |
| H | 3.95923600  | -2.54110900 | -19.54452200 |
| H | 4.08437500  | 0.88695000  | -16.91542200 |
| H | 4.21373700  | -0.07011200 | -19.22825500 |
| C | 3.11166100  | -2.62331400 | -13.59861300 |
| H | 4.05198100  | -2.16849900 | -13.23210400 |
| H | 2.36272200  | -1.82367300 | -13.68697200 |
| H | 2.75218300  | -3.33917900 | -12.84898600 |

**E-IM7b**

|    |             |            |              |
|----|-------------|------------|--------------|
| C  | 1.82108800  | 1.07860500 | -3.00405700  |
| C  | 0.96865800  | 2.03250500 | -3.78990600  |
| C  | 0.33345900  | 1.74287000 | -5.01718200  |
| H  | 1.17828300  | 3.08002200 | -3.55920200  |
| Pd | -1.22058000 | 1.83035100 | -3.34572200  |
| P  | -3.40539600 | 2.05034900 | -3.59839300  |
| O  | -4.31201900 | 1.01237200 | -4.59515300  |
| O  | -3.76654600 | 3.53036700 | -4.38643100  |
| C  | -4.48023900 | 2.10590600 | -6.73860100  |
| C  | -3.97926600 | 1.07106800 | -5.94433600  |
| C  | -3.15702400 | 0.03885600 | -6.45980400  |
| C  | -2.81346700 | 0.04342700 | -7.79917000  |
| C  | -2.81853000 | 1.16224100 | -10.01528600 |
| C  | -3.17102500 | 2.23183000 | -10.82403500 |
| C  | -3.94639100 | 3.29664000 | -10.28799100 |



|   |              |             |              |
|---|--------------|-------------|--------------|
| C | -4.37747300  | 3.26464200  | -8.96983800  |
| C | -4.05533100  | 2.16763400  | -8.11482000  |
| C | -3.23232000  | 1.10651600  | -8.65124400  |
| C | -5.39191300  | 3.11306100  | -6.12852700  |
| C | -4.99635700  | 3.78476900  | -4.96550500  |
| C | -5.79456700  | 4.79590100  | -4.36645400  |
| C | -7.02099600  | 5.12120400  | -4.91292700  |
| C | -8.80169400  | 4.71630900  | -6.59521300  |
| C | -9.29679900  | 4.00990900  | -7.68049800  |
| C | -8.51744700  | 2.97174000  | -8.26021200  |
| C | -7.25591800  | 2.67142400  | -7.76611100  |
| C | -6.70106200  | 3.39545200  | -6.66666100  |
| C | -7.51312500  | 4.42591900  | -6.05667600  |
| H | -2.80598300  | -0.73236000 | -5.77493900  |
| H | -2.18771900  | -0.75011800 | -8.21351500  |
| H | -2.20403600  | 0.34664700  | -10.40452300 |
| H | -2.84434400  | 2.26632300  | -11.86538800 |
| H | -4.19999300  | 4.15194400  | -10.91776000 |
| H | -4.96078100  | 4.09233600  | -8.56941800  |
| H | -5.41193100  | 5.30033800  | -3.47835600  |
| H | -7.63804700  | 5.90319100  | -4.46493200  |
| H | -9.39410000  | 5.50482600  | -6.12444200  |
| H | -10.28565200 | 4.23903900  | -8.08298100  |
| H | -8.91727500  | 2.39936600  | -9.09999800  |
| H | -6.67759300  | 1.86631300  | -8.21638900  |
| C | -3.81542100  | 2.18098200  | -0.91968300  |
| C | -5.87244100  | 2.01933800  | -2.24031400  |
| C | -4.42119100  | 1.19742000  | 0.09434000   |
| H | -4.03146600  | 3.21466100  | -0.58713300  |
| H | -2.72389200  | 2.04895500  | -0.97147800  |
| C | -6.43212300  | 1.04785500  | -1.18498300  |
| H | -6.19415000  | 3.04677100  | -1.98819400  |
| H | -6.25958000  | 1.75896900  | -3.23259500  |
| H | -4.15402200  | 0.16964800  | -0.22219900  |
| H | -6.15615300  | 0.01757800  | -1.48904500  |
| N | -4.40227600  | 1.93768000  | -2.24658800  |
| O | -5.85648200  | 1.32005800  | 0.10634800   |
| C | -7.94583400  | 1.17755700  | -1.04931000  |
| H | -8.43237600  | 0.93890500  | -2.00837000  |
| H | -8.32213800  | 0.48674000  | -0.27888600  |
| H | -8.21607400  | 2.20673300  | -0.76244000  |
| C | -3.92145100  | 1.46509100  | 1.50975700   |
| H | -4.38595200  | 0.76289700  | 2.21927600   |
| H | -2.82734500  | 1.34185400  | 1.55382700   |

|   |             |             |             |
|---|-------------|-------------|-------------|
| H | -4.17210300 | 2.49354900  | 1.81633000  |
| C | 0.85406100  | -0.69389500 | -0.84301600 |
| H | 0.56524600  | -0.65978400 | 0.21883300  |
| H | 1.76807600  | -1.29484900 | -0.95121000 |
| C | -0.25371100 | -1.18112600 | -1.73263800 |
| C | 0.02340200  | -2.10396800 | -2.76212700 |
| C | -1.57845100 | -0.73020600 | -1.55413300 |
| C | -1.00467800 | -2.57792100 | -3.59151600 |
| H | 1.04798500  | -2.45684000 | -2.90141500 |
| C | -2.60535600 | -1.20161500 | -2.38609600 |
| H | -1.80361000 | -0.02174200 | -0.75787200 |
| C | -2.32206300 | -2.12645700 | -3.40424000 |
| H | -0.77685900 | -3.29755200 | -4.38048600 |
| H | -3.61922900 | -0.82678500 | -2.24855300 |
| H | -3.12414800 | -2.49113200 | -4.04871000 |
| S | 1.40544600  | 1.05910700  | -1.16022300 |
| O | 2.66153800  | 1.26044300  | -0.38551800 |
| O | 0.24759700  | 1.96768500  | -0.88964500 |
| H | 2.88162500  | 1.37677400  | -2.99474800 |
| H | 1.74240700  | 0.03172800  | -3.32232700 |
| C | -0.05007300 | 2.84709700  | -5.96131000 |
| C | -0.25460200 | 4.17958800  | -5.51698600 |
| C | -0.24512800 | 2.58438100  | -7.33743700 |
| C | -0.64141200 | 5.19029300  | -6.40147500 |
| H | -0.16691700 | 4.40964900  | -4.45467700 |
| C | -0.64309200 | 3.59745300  | -8.22537400 |
| H | -0.10123000 | 1.57913300  | -7.72917900 |
| C | -0.84565500 | 4.90509500  | -7.76561100 |
| H | -0.80645500 | 6.20122600  | -6.02151000 |
| H | -0.81160600 | 3.35021300  | -9.27478300 |
| H | -1.17075900 | 5.68943600  | -8.45241500 |
| C | 0.37455100  | 0.33537700  | -5.59452600 |
| H | -0.52799300 | 0.13209400  | -6.18360300 |
| H | 1.24891300  | 0.22035500  | -6.26266600 |
| H | 0.43299100  | -0.42571600 | -4.80857500 |

**(R)-IM8**

|    |             |             |              |
|----|-------------|-------------|--------------|
| Pd | 1.77132200  | -4.36655000 | -15.68978900 |
| P  | -0.04710200 | -3.12130300 | -15.95941900 |
| O  | -0.42069700 | -2.60545900 | -17.53471000 |
| O  | 0.00604400  | -1.57658800 | -15.20696300 |
| C  | 0.25268000  | -0.30218800 | -17.71656900 |
| C  | 0.44013100  | -1.64429400 | -18.05625300 |
| C  | 1.46668200  | -2.07888900 | -18.93278500 |

|   |             |             |              |
|---|-------------|-------------|--------------|
| C | 2.32566800  | -1.14799800 | -19.48918000 |
| C | 3.12377100  | 1.19558400  | -19.69110600 |
| C | 3.04593200  | 2.53058700  | -19.32629100 |
| C | 2.05548500  | 2.95285000  | -18.39731200 |
| C | 1.14816500  | 2.04630100  | -17.86842900 |
| C | 1.17925300  | 0.66838400  | -18.24314000 |
| C | 2.21366400  | 0.23458400  | -19.15778400 |
| C | -0.84899300 | 0.05172700  | -16.77816200 |
| C | -0.92507600 | -0.60428800 | -15.54316700 |
| C | -1.91690100 | -0.28833600 | -14.57753300 |
| C | -2.86863000 | 0.67436100  | -14.85766200 |
| C | -3.89932100 | 2.28344800  | -16.44542800 |
| C | -3.94052700 | 2.88616500  | -17.69328800 |
| C | -2.96828600 | 2.54636800  | -18.67370800 |
| C | -1.96414700 | 1.63217300  | -18.38902500 |
| C | -1.87534500 | 1.00930000  | -17.10644200 |
| C | -2.88699400 | 1.33110100  | -16.12358900 |
| H | 1.55435300  | -3.14363500 | -19.14754400 |
| H | 3.11557200  | -1.46331500 | -20.17457500 |
| H | 3.89280000  | 0.85083600  | -20.38662200 |
| H | 3.75047500  | 3.25596000  | -19.73819900 |
| H | 2.01180200  | 4.00025100  | -18.09146900 |
| H | 0.40166800  | 2.38229300  | -17.15046900 |
| H | -1.90580300 | -0.82260200 | -13.62679300 |
| H | -3.63316500 | 0.92900000  | -14.12028500 |
| H | -4.64916400 | 2.51946800  | -15.68642800 |
| H | -4.72232200 | 3.61084400  | -17.92957900 |
| H | -3.01505500 | 3.00477500  | -19.66381300 |
| H | -1.23199800 | 1.37592900  | -19.15346100 |
| C | -1.59642100 | -4.97655600 | -14.70693400 |
| C | -2.86297400 | -3.29560300 | -15.96664100 |
| C | -2.47205800 | -6.06976500 | -15.33979600 |
| H | -2.04492900 | -4.67491500 | -13.74141100 |
| H | -0.58314700 | -5.36114000 | -14.51954700 |
| C | -3.71458700 | -4.43343900 | -16.55990700 |
| H | -3.36313100 | -2.90479700 | -15.06181600 |
| H | -2.75849400 | -2.48304000 | -16.69454400 |
| H | -1.98869700 | -6.39134800 | -16.28355900 |
| H | -3.22675100 | -4.76878200 | -17.49800700 |
| N | -1.53262100 | -3.81761500 | -15.61140200 |
| O | -3.77815800 | -5.54418900 | -15.64600900 |
| C | -5.14510300 | -3.98142100 | -16.83444700 |
| H | -5.14616700 | -3.15601100 | -17.56404100 |
| H | -5.73886500 | -4.81485800 | -17.24098700 |

|   |             |             |              |
|---|-------------|-------------|--------------|
| H | -5.62021400 | -3.63143500 | -15.90369500 |
| C | -2.65750600 | -7.25889500 | -14.40362100 |
| H | -3.30237300 | -8.01893700 | -14.87146500 |
| H | -1.68083100 | -7.71328300 | -14.17321100 |
| H | -3.12428400 | -6.93281600 | -13.46004700 |
| C | 3.92959900  | -5.00841700 | -12.88503500 |
| C | 4.19506900  | -5.77528700 | -14.19180900 |
| H | 3.94874600  | -5.67181900 | -12.00980400 |
| H | 4.71023600  | -4.24359600 | -12.75917800 |
| C | 3.91168700  | -4.93236900 | -15.42353000 |
| C | 3.75250300  | -3.53444000 | -15.39757800 |
| H | 4.19051400  | -5.37775800 | -16.37872800 |
| C | 5.55394900  | -6.47456500 | -14.24989700 |
| C | 6.35424600  | -6.60633100 | -13.09346300 |
| C | 6.04216500  | -7.03264500 | -15.45443600 |
| C | 7.59614200  | -7.25797700 | -13.14131000 |
| H | 6.01716000  | -6.19762900 | -12.14272500 |
| C | 7.27896200  | -7.69142200 | -15.50201600 |
| H | 5.46050600  | -6.96109200 | -16.37151400 |
| C | 8.06576200  | -7.80581200 | -14.34477900 |
| H | 8.19402700  | -7.33779800 | -12.23095800 |
| H | 7.62677100  | -8.11168200 | -16.44805000 |
| H | 9.03114400  | -8.31472500 | -14.38103000 |
| H | 3.78492900  | -2.96735700 | -14.46456800 |
| H | 3.97489100  | -2.96014600 | -16.30275000 |
| H | 2.95109900  | -4.51445700 | -12.94042900 |
| C | 2.77533600  | -8.10627000 | -15.70454600 |
| H | 2.11452500  | -8.94661700 | -15.43803100 |
| H | 3.78507000  | -8.49649400 | -15.88288500 |
| C | 2.24805300  | -7.31613600 | -16.86848800 |
| C | 0.93596600  | -6.78621000 | -16.85955700 |
| C | 3.05423000  | -7.12458200 | -18.00868600 |
| C | 0.44871000  | -6.07982000 | -17.97567000 |
| H | 0.29239500  | -6.95643400 | -15.99778500 |
| C | 2.56567900  | -6.42039900 | -19.11913200 |
| H | 4.06298600  | -7.54178400 | -18.02532600 |
| C | 1.26188800  | -5.89538800 | -19.10571400 |
| H | -0.56262000 | -5.67421800 | -17.94993100 |
| H | 3.20099500  | -6.28647200 | -19.99715900 |
| H | 0.87983200  | -5.35039300 | -19.97085100 |
| S | 2.86866900  | -7.23090900 | -14.05627200 |
| O | 3.38020300  | -8.24333400 | -13.08959200 |
| O | 1.52664900  | -6.62401000 | -13.78316000 |

(S)-IM8

|    |              |            |             |
|----|--------------|------------|-------------|
| C  | 1.82852500   | 0.80049700 | -4.56998300 |
| C  | 1.09470400   | 2.04792800 | -4.10809800 |
| C  | 0.14887100   | 2.73457400 | -4.89535400 |
| H  | 1.57745100   | 2.61581200 | -3.31257800 |
| H  | -0.13914600  | 2.37841100 | -5.88669000 |
| H  | 0.00871500   | 3.80758300 | -4.73097300 |
| Pd | -0.98271700  | 1.73714700 | -3.34567100 |
| P  | -3.17181900  | 2.07623500 | -3.44488600 |
| O  | -3.63590600  | 3.71047200 | -3.64408900 |
| O  | -4.10118800  | 1.75352900 | -2.03879600 |
| C  | -4.01593000  | 4.54098600 | -1.42092000 |
| C  | -3.23416900  | 4.50889300 | -2.57822500 |
| C  | -2.04036000  | 5.26295600 | -2.71823300 |
| C  | -1.60430300  | 6.05041000 | -1.66855300 |
| C  | -1.82456700  | 6.80810100 | 0.68584200  |
| C  | -2.47839000  | 6.76826300 | 1.90787200  |
| C  | -3.65349600  | 5.98119700 | 2.05606400  |
| C  | -4.16625200  | 5.26595900 | 0.98328600  |
| C  | -3.52865000  | 5.29580400 | -0.29374900 |
| C  | -2.31567400  | 6.07172300 | -0.43301000 |
| C  | -5.28842900  | 3.76838100 | -1.39610200 |
| C  | -5.28291700  | 2.40763300 | -1.72927400 |
| C  | -6.46287100  | 1.61647300 | -1.69932500 |
| C  | -7.67124700  | 2.19195100 | -1.35480500 |
| C  | -9.00791500  | 4.20052800 | -0.76623600 |
| C  | -9.09583300  | 5.56497600 | -0.53728700 |
| C  | -7.92542700  | 6.36859900 | -0.61174100 |
| C  | -6.69068100  | 5.79949600 | -0.88881300 |
| C  | -6.55635200  | 4.39342900 | -1.10434800 |
| C  | -7.75577100  | 3.58573600 | -1.06519300 |
| H  | -1.49178900  | 5.20615900 | -3.65791200 |
| H  | -0.69107300  | 6.64214200 | -1.76160500 |
| H  | -0.90946800  | 7.39219500 | 0.56094900  |
| H  | -2.08822100  | 7.32927000 | 2.75950100  |
| H  | -4.15448300  | 5.93385600 | 3.02514900  |
| H  | -5.06236900  | 4.66042200 | 1.11196300  |
| H  | -6.38438000  | 0.55821200 | -1.95079400 |
| H  | -8.58190900  | 1.58982800 | -1.32043800 |
| H  | -9.89992700  | 3.57016800 | -0.73370100 |
| H  | -10.06021300 | 6.02576300 | -0.31391300 |
| H  | -7.99846600  | 7.44703700 | -0.45583500 |
| H  | -5.80742400  | 6.43272900 | -0.95346600 |
| C  | -3.30919800  | 0.63756900 | -5.74412200 |

|   |             |             |             |
|---|-------------|-------------|-------------|
| C | -5.35168600 | 1.86387500  | -5.17663800 |
| C | -3.16673600 | 1.50324000  | -7.00548400 |
| H | -3.87809500 | -0.27613500 | -5.99120600 |
| H | -2.31760800 | 0.35033000  | -5.36286300 |
| C | -5.17529800 | 2.68868800  | -6.46742000 |
| H | -5.99363700 | 0.99029800  | -5.38752600 |
| H | -5.82885300 | 2.47610500  | -4.40191000 |
| H | -2.57425000 | 2.40001900  | -6.73030300 |
| H | -4.57857100 | 3.58631600  | -6.21473100 |
| N | -4.04262800 | 1.37628300  | -4.70050500 |
| O | -4.46662400 | 1.92341200  | -7.46227000 |
| C | -6.51809900 | 3.09017700  | -7.06846200 |
| H | -7.07625100 | 3.71838100  | -6.35599500 |
| H | -6.36716400 | 3.65916800  | -7.99910600 |
| H | -7.11820700 | 2.19425200  | -7.29651800 |
| C | -2.49303500 | 0.74893800  | -8.14661100 |
| H | -2.42893300 | 1.38497800  | -9.04321400 |
| H | -1.47457300 | 0.45067500  | -7.84989000 |
| H | -3.06660100 | -0.15789500 | -8.39864600 |
| C | 1.85246400  | -0.11389600 | -1.58877000 |
| H | 2.91886800  | 0.14444500  | -1.58403800 |
| H | 1.71648800  | -1.05998600 | -1.04047000 |
| C | 0.99309600  | 0.98831600  | -1.03638600 |
| C | -0.40882100 | 0.83025400  | -0.89897600 |
| C | 1.59058700  | 2.18648400  | -0.59448200 |
| C | -1.18373300 | 1.85384600  | -0.31336900 |
| H | -0.87739000 | -0.11229800 | -1.18364200 |
| C | 0.81309900  | 3.20432200  | -0.02175700 |
| H | 2.67226900  | 2.30663300  | -0.68007900 |
| C | -0.57541400 | 3.04213900  | 0.12043300  |
| H | -2.25936100 | 1.71600000  | -0.21304200 |
| H | 1.29293900  | 4.12374200  | 0.32086000  |
| H | -1.17873700 | 3.83229300  | 0.56655200  |
| S | 1.49183700  | -0.69267600 | -3.32788200 |
| O | 0.03791900  | -1.04123000 | -3.40513200 |
| O | 2.48178700  | -1.77084500 | -3.60986300 |
| C | 3.34729100  | 0.98025700  | -4.57954000 |
| C | 4.00703100  | 1.66963100  | -3.53548600 |
| C | 4.14223700  | 0.43969800  | -5.61399400 |
| C | 5.40141200  | 1.81379400  | -3.52564900 |
| H | 3.43669200  | 2.10036100  | -2.71455500 |
| C | 5.53759500  | 0.59078400  | -5.61054600 |
| H | 3.68009300  | -0.10218600 | -6.43703900 |
| C | 6.17628100  | 1.27616700  | -4.56596900 |

|   |            |             |             |
|---|------------|-------------|-------------|
| H | 5.87967500 | 2.35004100  | -2.70325800 |
| H | 6.12369900 | 0.16549800  | -6.42800100 |
| H | 7.26215000 | 1.39072700  | -4.56221100 |
| C | 1.25001100 | 0.22706600  | -5.87562800 |
| H | 1.49235100 | 0.91166400  | -6.70175500 |
| H | 1.66918100 | -0.76141800 | -6.10686300 |
| H | 0.15979200 | 0.13867500  | -5.79147100 |

**TS-iso-1**

|   |            |              |              |
|---|------------|--------------|--------------|
| P | 0.43693400 | -7.74068400  | -12.30068600 |
| O | 0.80211000 | -8.16263000  | -13.89342300 |
| O | 1.87411800 | -6.95784100  | -11.87334500 |
| C | 3.20913200 | -8.08707700  | -14.09415300 |
| C | 2.01776600 | -8.81719900  | -14.09853300 |
| C | 1.97007800 | -10.21058500 | -14.34692000 |
| C | 3.14608100 | -10.90374900 | -14.56826000 |
| C | 5.62616600 | -10.95349300 | -14.67532800 |
| C | 6.84882000 | -10.30884200 | -14.57492500 |
| C | 6.89313000 | -8.91589800  | -14.29150300 |
| C | 5.72354500 | -8.18673700  | -14.13440100 |
| C | 4.44530100 | -8.81208100  | -14.25396200 |
| C | 4.40414900 | -10.23614300 | -14.50831600 |
| C | 3.15841000 | -6.61229000  | -13.89203300 |
| C | 2.48796800 | -6.09444300  | -12.78049300 |
| C | 2.42663700 | -4.70665000  | -12.49739800 |
| C | 3.02738600 | -3.80889100  | -13.36009900 |
| C | 4.24407100 | -3.33838000  | -15.47259000 |
| C | 4.82843000 | -3.77804300  | -16.65005800 |
| C | 4.85258200 | -5.16743400  | -16.95081300 |
| C | 4.31708300 | -6.09364800  | -16.06746500 |
| C | 3.72932200 | -5.67989600  | -14.83338600 |
| C | 3.67332000 | -4.26267200  | -14.54775300 |
| H | 1.00139000 | -10.70673400 | -14.36340400 |
| H | 3.12589400 | -11.97738400 | -14.76621600 |
| H | 5.57439600 | -12.02640600 | -14.87497900 |
| H | 7.77803300 | -10.86793500 | -14.70103200 |
| H | 7.85806000 | -8.41505600  | -14.19053200 |
| H | 5.77350500 | -7.12235700  | -13.91005100 |
| H | 1.90298600 | -4.37794500  | -11.59933400 |
| H | 2.99572300 | -2.73710200  | -13.15341400 |
| H | 4.19986900 | -2.27291600  | -15.23483300 |
| H | 5.25824200 | -3.06135400  | -17.35256400 |
| H | 5.29197400 | -5.51032700  | -17.88976000 |
| H | 4.33522300 | -7.15307900  | -16.31773500 |

|    |             |              |              |
|----|-------------|--------------|--------------|
| C  | -1.91616800 | -6.45507700  | -11.72371300 |
| C  | -0.70811600 | -5.60956900  | -13.69509700 |
| C  | -3.20143600 | -6.46765500  | -12.56571700 |
| H  | -1.83715700 | -5.48751800  | -11.19536300 |
| H  | -1.95859700 | -7.26661100  | -10.98254800 |
| C  | -2.03477100 | -5.64102900  | -14.47563500 |
| H  | -0.57293900 | -4.60972800  | -13.24650400 |
| H  | 0.13123500  | -5.81541700  | -14.36841300 |
| H  | -3.27454800 | -7.45740200  | -13.05927700 |
| H  | -2.12359800 | -6.63740300  | -14.95417200 |
| N  | -0.74810800 | -6.61738300  | -12.61419300 |
| O  | -3.14639500 | -5.44956200  | -13.58419300 |
| C  | -2.08850800 | -4.53563000  | -15.52529500 |
| H  | -1.27555200 | -4.66780100  | -16.25683500 |
| H  | -3.05204900 | -4.56247700  | -16.05721500 |
| H  | -1.97762400 | -3.54907900  | -15.04684200 |
| C  | -4.43260600 | -6.21535200  | -11.70452400 |
| H  | -5.34150700 | -6.22006600  | -12.32635200 |
| H  | -4.50692800 | -7.00400800  | -10.94025200 |
| H  | -4.35441800 | -5.23688400  | -11.20277800 |
| Pd | -0.13867000 | -9.32977500  | -10.92049100 |
| C  | 1.95232300  | -12.21764100 | -11.35229300 |
| C  | 1.64471400  | -11.97135600 | -9.89607900  |
| H  | 2.57300400  | -13.11847100 | -11.48048500 |
| H  | 2.45665600  | -11.36732700 | -11.82377000 |
| C  | 1.58501700  | -10.69053100 | -9.37474900  |
| C  | 1.82471300  | -9.47595000  | -10.11228000 |
| H  | 1.21575600  | -10.56651700 | -8.35613100  |
| C  | 1.30809400  | -13.13626900 | -9.05921900  |
| C  | 0.80357800  | -14.32311800 | -9.65264700  |
| C  | 1.47567500  | -13.11618100 | -7.64944600  |
| C  | 0.45909600  | -15.43033800 | -8.86731800  |
| H  | 0.64713900  | -14.36284900 | -10.73066500 |
| C  | 1.14374000  | -14.22894100 | -6.86899200  |
| H  | 1.89797200  | -12.23179600 | -7.17053000  |
| C  | 0.62988600  | -15.39097200 | -7.47292000  |
| H  | 0.05411100  | -16.32490200 | -9.34498100  |
| H  | 1.29310100  | -14.19358900 | -5.78789900  |
| H  | 0.36933600  | -16.25790000 | -6.86235300  |
| H  | 2.50976700  | -9.50727500  | -10.96524600 |
| H  | 1.93753400  | -8.56443600  | -9.51404700  |
| H  | 1.01021000  | -12.38614200 | -11.90191800 |
| C  | -3.24430800 | -10.26215600 | -11.75711500 |
| H  | -4.32193000 | -10.09021800 | -11.90312200 |



|   |             |              |              |
|---|-------------|--------------|--------------|
| H | -2.67885900 | -9.37624100  | -12.09148200 |
| C | -2.74824000 | -11.52008200 | -12.38302500 |
| C | -3.45310700 | -12.73523400 | -12.22451600 |
| C | -1.51975300 | -11.54427300 | -13.07906700 |
| C | -2.94176300 | -13.93534800 | -12.73945100 |
| H | -4.40572500 | -12.73437500 | -11.68871700 |
| C | -1.01017300 | -12.74268500 | -13.60364700 |
| H | -0.97118800 | -10.60854800 | -13.21410000 |
| C | -1.71685000 | -13.94533900 | -13.43165400 |
| H | -3.49976200 | -14.86461600 | -12.60325500 |
| H | -0.06330100 | -12.73684000 | -14.14851600 |
| H | -1.32325300 | -14.87870600 | -13.83991000 |
| S | -3.01470900 | -10.24381700 | -9.83061200  |
| O | -3.29187400 | -8.77485400  | -9.50942600  |
| O | -1.47311400 | -10.59576300 | -9.72288500  |

**TS-iso-rotate**

|    |             |             |              |
|----|-------------|-------------|--------------|
| Pd | 0.76738100  | -5.67622200 | -14.69952500 |
| P  | -0.51329000 | -4.14233700 | -15.64332100 |
| O  | -0.32979500 | -3.93276100 | -17.28508200 |
| O  | -0.16608600 | -2.58454800 | -15.09637200 |
| C  | 1.10478200  | -2.00976700 | -17.56909400 |
| C  | 0.91041500  | -3.38791700 | -17.65946300 |
| C  | 1.89530800  | -4.28430700 | -18.13597600 |
| C  | 3.10894700  | -3.78237000 | -18.57078600 |
| C  | 4.64947300  | -1.86679700 | -18.90992700 |
| C  | 4.94978000  | -0.52337300 | -18.75685300 |
| C  | 4.00133200  | 0.34937100  | -18.15810300 |
| C  | 2.75760900  | -0.11950000 | -17.76256900 |
| C  | 2.39670500  | -1.48843900 | -17.94386100 |
| C  | 3.38909500  | -2.38720500 | -18.49188600 |
| C  | 0.01100400  | -1.14934600 | -17.04081400 |
| C  | -0.57610100 | -1.45965500 | -15.81063500 |
| C  | -1.55636700 | -0.63664100 | -15.19996700 |
| C  | -1.99699200 | 0.49946100  | -15.85196400 |
| C  | -2.00244800 | 1.96181700  | -17.85890100 |
| C  | -1.55449900 | 2.25371600  | -19.13788600 |
| C  | -0.59364600 | 1.40999000  | -19.75931900 |
| C  | -0.08017700 | 0.30777800  | -19.09105400 |
| C  | -0.49955400 | -0.00967600 | -17.76369300 |
| C  | -1.50409700 | 0.82959300  | -17.14886200 |
| H  | 1.66628300  | -5.34792800 | -18.15957500 |
| H  | 3.87565200  | -4.45385700 | -18.96297600 |
| H  | 5.38074400  | -2.55874800 | -19.33400000 |

|   |             |             |              |
|---|-------------|-------------|--------------|
| H | 5.92170000  | -0.13739700 | -19.06981200 |
| H | 4.25659700  | 1.39895700  | -17.99993100 |
| H | 2.04508200  | 0.56066900  | -17.29930500 |
| H | -1.94279300 | -0.92243300 | -14.22117900 |
| H | -2.74570700 | 1.14694200  | -15.39093000 |
| H | -2.75480300 | 2.58804400  | -17.37350300 |
| H | -1.94525700 | 3.12099300  | -19.67374300 |
| H | -0.25952500 | 1.62742500  | -20.77587800 |
| H | 0.64873500  | -0.33340200 | -19.58409600 |
| C | -2.71720100 | -5.03494200 | -14.36395400 |
| C | -3.13767400 | -3.51997000 | -16.26467100 |
| C | -4.03267700 | -5.75653500 | -14.70385100 |
| H | -2.91969100 | -4.26710300 | -13.59390800 |
| H | -1.98529200 | -5.75444800 | -13.96540200 |
| C | -4.42262200 | -4.31098800 | -16.55488100 |
| H | -3.38705500 | -2.65994500 | -15.61882000 |
| H | -2.70055200 | -3.14913800 | -17.19933400 |
| H | -3.81125200 | -6.58042800 | -15.41058800 |
| H | -4.17068400 | -5.14728700 | -17.23782600 |
| N | -2.16361900 | -4.40273300 | -15.58248900 |
| O | -4.95562400 | -4.85076200 | -15.33209500 |
| C | -5.49408400 | -3.41859500 | -17.17260200 |
| H | -5.13829700 | -3.01012600 | -18.13152400 |
| H | -6.41340000 | -3.99687000 | -17.35215700 |
| H | -5.72974700 | -2.58109300 | -16.49644700 |
| C | -4.70177300 | -6.30703300 | -13.44887700 |
| H | -5.64567200 | -6.80883000 | -13.71128900 |
| H | -4.03825400 | -7.03531800 | -12.95612200 |
| H | -4.92035000 | -5.49087300 | -12.74169400 |
| C | 3.30305300  | -2.27409500 | -11.97198400 |
| C | 3.52453100  | -2.63055300 | -13.43111000 |
| H | 4.26295900  | -2.16058100 | -11.44217500 |
| H | 2.76464000  | -1.31373600 | -11.87509800 |
| C | 2.72952200  | -3.52194500 | -14.07697500 |
| C | 1.61020500  | -4.27848700 | -13.41215600 |
| H | 2.88970000  | -3.68149500 | -15.14513300 |
| C | 4.62074000  | -1.92453000 | -14.14630700 |
| C | 4.99123200  | -0.60785000 | -13.78159200 |
| C | 5.34616100  | -2.55167300 | -15.18807700 |
| C | 6.02813400  | 0.06345700  | -14.44709300 |
| H | 4.45266900  | -0.10109400 | -12.97896500 |
| C | 6.38657300  | -1.88456300 | -15.84713100 |
| H | 5.10218000  | -3.58002700 | -15.46055100 |
| C | 6.73220200  | -0.57141900 | -15.48312000 |

|   |             |             |              |
|---|-------------|-------------|--------------|
| H | 6.28636100  | 1.08375300  | -14.15345300 |
| H | 6.93466500  | -2.39382100 | -16.64229400 |
| H | 7.54499300  | -0.05324100 | -15.99672600 |
| H | 1.95972800  | -4.91760600 | -12.58538800 |
| H | 0.80373900  | -3.62293500 | -13.05225300 |
| H | 2.70701500  | -3.04095000 | -11.45527200 |
| C | 2.25990500  | -8.96780000 | -15.64678000 |
| H | 1.86179000  | -9.62474300 | -14.85983100 |
| H | 3.03704600  | -9.48781700 | -16.22551000 |
| C | 1.20772500  | -8.36589200 | -16.50504500 |
| C | -0.04993500 | -7.99039200 | -15.95706400 |
| C | 1.44792200  | -8.09411500 | -17.87017700 |
| C | -1.03303000 | -7.38628600 | -16.76728500 |
| H | -0.28389400 | -8.26356700 | -14.92672700 |
| C | 0.45883100  | -7.50667200 | -18.67437100 |
| H | 2.41034600  | -8.37361300 | -18.30512200 |
| C | -0.78172600 | -7.14047400 | -18.12482300 |
| H | -1.99336300 | -7.11743100 | -16.33194600 |
| H | 0.66196500  | -7.32423200 | -19.73183600 |
| H | -1.54468900 | -6.67020400 | -18.74697200 |
| S | 3.20364900  | -7.62318900 | -14.61203100 |
| O | 4.11722800  | -8.43993700 | -13.72364500 |
| O | 1.94281200  | -7.11466300 | -13.74409100 |

**TS-iso-2**

|    |             |             |              |
|----|-------------|-------------|--------------|
| Pd | 1.28555300  | -4.61532600 | -14.64683800 |
| P  | -0.30413800 | -3.41423500 | -15.53512500 |
| O  | -0.23801500 | -3.00994800 | -17.17079500 |
| O  | -0.33531700 | -1.85905200 | -14.85857900 |
| C  | 0.55078300  | -0.73147400 | -17.28940100 |
| C  | 0.74794400  | -2.09183700 | -17.53662400 |
| C  | 1.91270900  | -2.60351300 | -18.15945900 |
| C  | 2.92572400  | -1.73464000 | -18.52074400 |
| C  | 3.88622800  | 0.55460500  | -18.55877800 |
| C  | 3.80175200  | 1.90162400  | -18.24358300 |
| C  | 2.64341000  | 2.40376000  | -17.58922600 |
| C  | 1.58374900  | 1.56369500  | -17.27965900 |
| C  | 1.62589100  | 0.17469500  | -17.60871200 |
| C  | 2.82018900  | -0.33973100 | -18.24404700 |
| C  | -0.71914400 | -0.28407700 | -16.65166400 |
| C  | -1.11869800 | -0.86588700 | -15.44538300 |
| C  | -2.28577900 | -0.46199500 | -14.74856400 |
| C  | -3.09081100 | 0.52675200  | -15.28303200 |
| C  | -3.62979300 | 2.10059900  | -17.12684700 |

|   |             |             |              |
|---|-------------|-------------|--------------|
| C | -3.34285800 | 2.64473800  | -18.36903100 |
| C | -2.18937400 | 2.21408900  | -19.08021800 |
| C | -1.33375200 | 1.26726000  | -18.53582100 |
| C | -1.58464200 | 0.70253200  | -17.24851800 |
| C | -2.77657600 | 1.11829900  | -16.54205000 |
| H | 1.98765000  | -3.67768200 | -18.32075000 |
| H | 3.83153600  | -2.11025200 | -19.00161900 |
| H | 4.77658000  | 0.14904500  | -19.04492500 |
| H | 4.62579100  | 2.57604800  | -18.48448300 |
| H | 2.58886500  | 3.46087100  | -17.32139400 |
| H | 0.70819700  | 1.96184900  | -16.76954000 |
| H | -2.52277000 | -0.94402700 | -13.79954500 |
| H | -3.98931500 | 0.85409700  | -14.75572300 |
| H | -4.52135300 | 2.40761700  | -16.57505900 |
| H | -4.00462700 | 3.39404300  | -18.80784700 |
| H | -1.97656800 | 2.62865600  | -20.06771200 |
| H | -0.45839400 | 0.94120400  | -19.09553500 |
| C | -2.21840200 | -5.09185100 | -14.53386400 |
| C | -3.00535000 | -3.51189000 | -16.24213300 |
| C | -3.05141000 | -6.18892100 | -15.21890500 |
| H | -2.82726700 | -4.62115000 | -13.74022600 |
| H | -1.31692300 | -5.52610700 | -14.07705900 |
| C | -3.82019200 | -4.65433600 | -16.87224400 |
| H | -3.64058300 | -2.96854300 | -15.52076900 |
| H | -2.67155900 | -2.81600000 | -17.01931600 |
| H | -2.41877700 | -6.67334500 | -15.98895400 |
| H | -3.17913500 | -5.15722400 | -17.62440800 |
| N | -1.83495000 | -4.07659700 | -15.53506800 |
| O | -4.19919200 | -5.61170100 | -15.86722700 |
| C | -5.09879600 | -4.13322300 | -17.52022900 |
| H | -4.85148600 | -3.42587400 | -18.32748800 |
| H | -5.67783800 | -4.96774900 | -17.94482000 |
| H | -5.72172400 | -3.61493100 | -16.77338700 |
| C | -3.54982700 | -7.22274800 | -14.21531800 |
| H | -4.16456900 | -7.98109400 | -14.72416300 |
| H | -2.69405400 | -7.72389400 | -13.73551600 |
| H | -4.15950200 | -6.73924400 | -13.43510700 |
| C | 4.47360600  | -4.59132200 | -12.97749200 |
| C | 4.49944500  | -4.72797900 | -14.48439500 |
| H | 5.29606800  | -5.13901300 | -12.49980400 |
| H | 4.56161300  | -3.52978400 | -12.69420600 |
| C | 3.66257000  | -3.94571000 | -15.27114800 |
| C | 2.68759100  | -3.01390500 | -14.77359400 |
| H | 3.68212900  | -4.08449900 | -16.35257000 |

|   |             |             |              |
|---|-------------|-------------|--------------|
| C | 5.42105100  | -5.68801200 | -15.12175300 |
| C | 5.82206200  | -6.86928800 | -14.44604300 |
| C | 5.92654000  | -5.47162500 | -16.43061300 |
| C | 6.66321100  | -7.80438400 | -15.06130400 |
| H | 5.42631100  | -7.07775700 | -13.45263000 |
| C | 6.77778900  | -6.40165900 | -17.03996900 |
| H | 5.67445700  | -4.55236200 | -16.96065400 |
| C | 7.14589500  | -7.57730400 | -16.36255000 |
| H | 6.93859500  | -8.71513300 | -14.52542200 |
| H | 7.16154900  | -6.20431700 | -18.04319900 |
| H | 7.80669000  | -8.30387500 | -16.83963400 |
| H | 2.76591900  | -2.66980500 | -13.73459500 |
| H | 2.36175800  | -2.23633200 | -15.46550100 |
| H | 3.51593900  | -4.95671400 | -12.57065400 |
| C | 1.49603300  | -8.39783900 | -14.60084300 |
| H | 0.44149900  | -8.48584900 | -14.29935400 |
| H | 1.98017100  | -9.38509900 | -14.57276100 |
| C | 1.67863500  | -7.70431400 | -15.90142700 |
| C | 0.65809100  | -6.87646000 | -16.42686200 |
| C | 2.89655400  | -7.80281200 | -16.61381700 |
| C | 0.83302400  | -6.20057800 | -17.64800400 |
| H | -0.29283900 | -6.80958500 | -15.89833500 |
| C | 3.07546900  | -7.12290000 | -17.82550100 |
| H | 3.70201800  | -8.42148500 | -16.21300200 |
| C | 2.04058000  | -6.32498100 | -18.35171400 |
| H | 0.02981900  | -5.57275100 | -18.03478000 |
| H | 4.02090900  | -7.21788000 | -18.36233400 |
| H | 2.17604800  | -5.80756700 | -19.30410600 |
| S | 2.30916800  | -7.47587800 | -13.09557400 |
| O | 1.89444900  | -8.35004800 | -11.92555500 |
| O | 1.47214800  | -6.11824500 | -13.09927700 |

**TS-iso-3**

|    |             |             |              |
|----|-------------|-------------|--------------|
| Pd | 1.44766900  | -4.54573500 | -14.94209000 |
| P  | -0.21878700 | -3.34521000 | -15.67933400 |
| O  | -0.30010600 | -2.91349600 | -17.30555100 |
| O  | -0.19212200 | -1.79725700 | -14.98170000 |
| C  | 0.42692100  | -0.61899400 | -17.47905600 |
| C  | 0.62681500  | -1.97318200 | -17.75509900 |
| C  | 1.72915200  | -2.45483800 | -18.50395700 |
| C  | 2.66953000  | -1.55961800 | -18.97936800 |
| C  | 3.55115400  | 0.75593600  | -19.13567800 |
| C  | 3.46734800  | 2.10119900  | -18.81294200 |
| C  | 2.38591200  | 2.57143600  | -18.01845500 |

|   |             |             |              |
|---|-------------|-------------|--------------|
| C | 1.39730500  | 1.70228400  | -17.58049500 |
| C | 1.43538700  | 0.31481800  | -17.91650500 |
| C | 2.55804100  | -0.16729700 | -18.69201800 |
| C | -0.77636500 | -0.20300800 | -16.70591700 |
| C | -1.03875900 | -0.80327000 | -15.47056600 |
| C | -2.12760200 | -0.41690900 | -14.64802300 |
| C | -2.99709400 | 0.56558200  | -15.08319200 |
| C | -3.76053200 | 2.13554900  | -16.84955900 |
| C | -3.62225700 | 2.68486200  | -18.11473500 |
| C | -2.54758100 | 2.27374300  | -18.95006900 |
| C | -1.62045400 | 1.34231800  | -18.50545300 |
| C | -1.71744700 | 0.77232700  | -17.19962000 |
| C | -2.83177100 | 1.16677700  | -16.36575800 |
| H | 1.81487200  | -3.52707700 | -18.67402400 |
| H | 3.52313100  | -1.91102800 | -19.56303100 |
| H | 4.38596800  | 0.37414000  | -19.72816300 |
| H | 4.23449900  | 2.79843700  | -19.15538900 |
| H | 2.33518200  | 3.62713700  | -17.74433200 |
| H | 0.58108600  | 2.07631900  | -16.96466800 |
| H | -2.25533800 | -0.90877800 | -13.68323600 |
| H | -3.83656200 | 0.87792000  | -14.45855100 |
| H | -4.59073700 | 2.42675700  | -16.20171000 |
| H | -4.34141200 | 3.42236300  | -18.47648000 |
| H | -2.45316000 | 2.69064700  | -19.95484100 |
| H | -0.80801400 | 1.03190600  | -19.16062500 |
| C | -2.01020100 | -5.10661900 | -14.59585800 |
| C | -2.97939600 | -3.41282200 | -16.09385600 |
| C | -2.90905800 | -6.15699200 | -15.27018800 |
| H | -2.52837700 | -4.70898200 | -13.70388100 |
| H | -1.06446100 | -5.57141300 | -14.28127500 |
| C | -3.85231600 | -4.51601500 | -16.71636600 |
| H | -3.54034600 | -2.92408900 | -15.27791000 |
| H | -2.72666600 | -2.66390200 | -16.85226500 |
| H | -2.35855800 | -6.57720900 | -16.13499800 |
| H | -3.29316300 | -4.95670800 | -17.56676800 |
| N | -1.74235400 | -4.00952600 | -15.54686100 |
| O | -4.12109500 | -5.54695300 | -15.75048100 |
| C | -5.19341500 | -3.96286600 | -17.18768300 |
| H | -5.03518100 | -3.19396700 | -17.96033700 |
| H | -5.81043200 | -4.77011600 | -17.61157300 |
| H | -5.73729900 | -3.50959500 | -16.34323700 |
| C | -3.29744900 | -7.26500100 | -14.29748800 |
| H | -3.95866900 | -7.99243900 | -14.79306900 |
| H | -2.39561500 | -7.78898600 | -13.94284000 |

|   |             |             |              |
|---|-------------|-------------|--------------|
| H | -3.82563700 | -6.84331900 | -13.42713900 |
| C | 5.58841500  | -5.75896300 | -15.12014400 |
| C | 4.62372600  | -4.74850300 | -14.52956900 |
| H | 5.74746200  | -6.60926900 | -14.44254100 |
| H | 5.22036700  | -6.12934600 | -16.08727200 |
| C | 3.79807700  | -4.06592200 | -15.42596000 |
| C | 2.87133900  | -2.99401000 | -15.17661500 |
| H | 3.87883700  | -4.38094500 | -16.47034800 |
| C | 4.75295200  | -4.44705600 | -13.08997100 |
| C | 6.02540400  | -4.57869500 | -12.47100900 |
| C | 3.66573700  | -4.03487000 | -12.27662000 |
| C | 6.20818700  | -4.27595200 | -11.11643500 |
| H | 6.88350600  | -4.89717100 | -13.06320400 |
| C | 3.84865000  | -3.74811900 | -10.91833300 |
| H | 2.66074500  | -3.99193800 | -12.69128500 |
| C | 5.12045100  | -3.85771100 | -10.33114900 |
| H | 7.20143600  | -4.37175400 | -10.67289900 |
| H | 2.98864800  | -3.45116400 | -10.31440600 |
| H | 5.25983800  | -3.63267100 | -9.27178800  |
| H | 2.91448700  | -2.45256500 | -14.22538500 |
| H | 2.64017500  | -2.35749900 | -16.03275400 |
| H | 6.57368800  | -5.28759400 | -15.29423500 |
| C | 2.02738800  | -8.39946400 | -15.21092400 |
| H | 1.10534900  | -8.84903000 | -14.81359400 |
| H | 2.80107300  | -9.17217500 | -15.33019900 |
| C | 1.80091000  | -7.61144700 | -16.45037400 |
| C | 0.55501800  | -6.98176500 | -16.68154500 |
| C | 2.82923100  | -7.43410400 | -17.40427200 |
| C | 0.32988300  | -6.23540400 | -17.84870400 |
| H | -0.24167200 | -7.10428200 | -15.94849800 |
| C | 2.60752500  | -6.68432000 | -18.56911700 |
| H | 3.79828300  | -7.91043900 | -17.23623500 |
| C | 1.35206000  | -6.09195000 | -18.80129600 |
| H | -0.64023000 | -5.76276600 | -18.00696800 |
| H | 3.40825100  | -6.57454100 | -19.30433400 |
| H | 1.17264400  | -5.52459400 | -19.71677800 |
| S | 2.64326200  | -7.35025700 | -13.69417100 |
| O | 2.55844700  | -8.35642800 | -12.56220100 |
| O | 1.46870600  | -6.28483900 | -13.60614200 |

**TS-iso-4**

|    |             |             |              |
|----|-------------|-------------|--------------|
| Pd | 0.14527800  | -5.73442000 | -13.96369400 |
| P  | -0.71618000 | -3.88406900 | -14.81165700 |
| O  | -0.33237300 | -3.62288400 | -16.42516500 |

|   |             |             |              |
|---|-------------|-------------|--------------|
| O | -0.08322000 | -2.47220500 | -14.13797600 |
| C | 1.36614000  | -1.91166300 | -16.49874300 |
| C | 0.98366900  | -3.23908700 | -16.69961400 |
| C | 1.85605600  | -4.23280900 | -17.20304700 |
| C | 3.15142600  | -3.88590900 | -17.53880000 |
| C | 4.96892300  | -2.19885000 | -17.64560100 |
| C | 5.44657900  | -0.92401900 | -17.38557000 |
| C | 4.59039600  | 0.04420200  | -16.79222700 |
| C | 3.27043400  | -0.26418900 | -16.49725500 |
| C | 2.73546300  | -1.55771000 | -16.78022900 |
| C | 3.62194900  | -2.55520100 | -17.33847900 |
| C | 0.37110400  | -0.94339200 | -15.95871400 |
| C | -0.31790600 | -1.25506400 | -14.78210300 |
| C | -1.24862800 | -0.37290500 | -14.17825100 |
| C | -1.52236300 | 0.84222900  | -14.77852500 |
| C | -1.23353300 | 2.42019000  | -16.67367100 |
| C | -0.67377500 | 2.73939200  | -17.90076400 |
| C | 0.22983800  | 1.83422300  | -18.52224900 |
| C | 0.57673700  | 0.64198400  | -17.90366900 |
| C | 0.03977400  | 0.29081800  | -16.62763800 |
| C | -0.90809900 | 1.19670300  | -16.01549000 |
| H | 1.48430800  | -5.24963100 | -17.31869900 |
| H | 3.83937300  | -4.63504000 | -17.93341000 |
| H | 5.62006800  | -2.96193800 | -18.07658300 |
| H | 6.48067700  | -0.66470700 | -17.62132900 |
| H | 4.97588000  | 1.03976300  | -16.56289500 |
| H | 2.62876400  | 0.48592000  | -16.03790800 |
| H | -1.73288600 | -0.67682000 | -13.24992100 |
| H | -2.23230400 | 1.53650400  | -14.32435900 |
| H | -1.94423000 | 3.09541400  | -16.19128900 |
| H | -0.93343000 | 3.67630900  | -18.39755000 |
| H | 0.65132200  | 2.07626900  | -19.50004500 |
| H | 1.26230100  | -0.04473800 | -18.39748900 |
| C | -3.25403200 | -4.74232900 | -14.25971600 |
| C | -3.09037600 | -2.85981100 | -15.82974500 |
| C | -3.94051200 | -5.56232300 | -15.36343600 |
| H | -4.01775300 | -4.21540900 | -13.66133700 |
| H | -2.67155700 | -5.40638200 | -13.60976200 |
| C | -3.79694000 | -3.72763600 | -16.88813200 |
| H | -3.84197200 | -2.27944700 | -15.26775300 |
| H | -2.39255400 | -2.16643300 | -16.31157600 |
| H | -3.14763800 | -6.08711300 | -15.92959600 |
| H | -3.01466600 | -4.26677500 | -17.45862900 |
| N | -2.37038400 | -3.72761400 | -14.86990400 |



|   |             |              |              |
|---|-------------|--------------|--------------|
| O | -4.66093600 | -4.68726100  | -16.25575800 |
| C | -4.65269700 | -2.87918200  | -17.82318700 |
| H | -4.01969500 | -2.15794800  | -18.36417200 |
| H | -5.16614500 | -3.52007800  | -18.55659800 |
| H | -5.41152200 | -2.32347900  | -17.24842100 |
| C | -4.93414000 | -6.56386600  | -14.78756000 |
| H | -5.44115300 | -7.10795700  | -15.59975600 |
| H | -4.39940900 | -7.28765100  | -14.15423700 |
| H | -5.69642900 | -6.04812500  | -14.18064400 |
| C | 3.65622900  | -8.04548300  | -12.58412800 |
| C | 3.46894200  | -6.65159200  | -13.14156400 |
| H | 3.31892100  | -8.79742200  | -13.32315400 |
| H | 4.71448100  | -8.26675100  | -12.36611300 |
| C | 2.43289400  | -5.87956400  | -12.65516100 |
| C | 1.83401800  | -4.69300400  | -13.24592900 |
| H | 1.92743100  | -6.26101700  | -11.76143700 |
| C | 4.40335200  | -6.21173800  | -14.19623900 |
| C | 4.97493200  | -7.14553200  | -15.09809600 |
| C | 4.83898600  | -4.86379800  | -14.27972600 |
| C | 5.90188100  | -6.74133100  | -16.06889900 |
| H | 4.68345900  | -8.19412700  | -15.04137100 |
| C | 5.77409200  | -4.46264300  | -15.24067500 |
| H | 4.46699900  | -4.13952000  | -13.55525600 |
| C | 6.30397500  | -5.39673000  | -16.14796600 |
| H | 6.31745500  | -7.47980400  | -16.75821200 |
| H | 6.09190600  | -3.41996800  | -15.28044400 |
| H | 7.03405600  | -5.08314800  | -16.89705500 |
| H | 1.44011900  | -3.95015300  | -12.54058800 |
| H | 2.34898400  | -4.23193600  | -14.09360400 |
| H | 3.05903600  | -8.19173600  | -11.67152900 |
| C | 0.10688900  | -9.50420300  | -14.87178100 |
| H | -0.82417600 | -10.07987900 | -14.98361500 |
| H | 0.88259700  | -10.12594400 | -14.40200900 |
| C | 0.55822900  | -8.85655300  | -16.13779300 |
| C | -0.37546200 | -8.47070900  | -17.12456900 |
| C | 1.92247200  | -8.56080800  | -16.34151100 |
| C | 0.05121700  | -7.83422800  | -18.29888200 |
| H | -1.43467500 | -8.67698400  | -16.96395100 |
| C | 2.35215400  | -7.92336700  | -17.51497700 |
| H | 2.64703700  | -8.84665300  | -15.57687300 |
| C | 1.41750600  | -7.56558500  | -18.50188700 |
| H | -0.68057200 | -7.54944400  | -19.05811500 |
| H | 3.41205200  | -7.70333200  | -17.65374100 |
| H | 1.74910800  | -7.07183700  | -19.41776900 |

|                 |             |             |              |
|-----------------|-------------|-------------|--------------|
| S               | -0.34884600 | -8.19988600 | -13.54686200 |
| O               | -0.88389700 | -9.00110600 | -12.38012300 |
| O               | -1.43083900 | -7.35914400 | -14.32663400 |
| <b>TS-iso-5</b> |             |             |              |
| C               | 0.38481200  | -1.43239800 | -4.01311200  |
| C               | -0.00583700 | 0.02667000  | -4.14735300  |
| H               | 0.29437700  | -1.78606200 | -2.97997700  |
| H               | -0.26021100 | -2.06467200 | -4.63503200  |
| C               | -0.40672400 | 0.50154900  | -5.49286100  |
| C               | -1.19865100 | -0.19386700 | -6.35918400  |
| H               | -0.07407800 | 1.49086200  | -5.81377400  |
| C               | 0.53984800  | 1.02090800  | -3.19703200  |
| C               | 1.17579900  | 0.61315000  | -1.98804600  |
| C               | 0.33323200  | 2.42842000  | -3.38413200  |
| C               | 1.55477300  | 1.54594000  | -1.02115100  |
| H               | 1.35872900  | -0.44248100 | -1.80435300  |
| C               | 0.70028900  | 3.35356400  | -2.39633900  |
| H               | -0.11936700 | 2.80609700  | -4.29945700  |
| C               | 1.31151800  | 2.92101300  | -1.21042200  |
| H               | 2.04012700  | 1.19994900  | -0.10602100  |
| H               | 0.51632300  | 4.41634200  | -2.56717900  |
| H               | 1.60793300  | 3.64254500  | -0.44647500  |
| H               | -1.58718400 | -1.18416100 | -6.11555800  |
| H               | -1.47832500 | 0.23690600  | -7.32165600  |
| H               | 1.43216500  | -1.56673400 | -4.34336000  |
| Pd              | -1.99280000 | 0.70000900  | -3.61540300  |
| P               | -3.68694700 | 2.20806200  | -3.48636600  |
| O               | -5.15739200 | 1.95383900  | -4.24332500  |
| O               | -3.14971000 | 3.55466800  | -4.40130300  |
| C               | -4.76045400 | 2.53997000  | -6.54064700  |
| C               | -4.96139500 | 1.55595500  | -5.57261900  |
| C               | -4.95236100 | 0.16744900  | -5.85195100  |
| C               | -4.72987900 | -0.25167200 | -7.15088800  |
| C               | -4.16363900 | 0.26280200  | -9.51309100  |
| C               | -3.84745600 | 1.17818500  | -10.50511100 |
| C               | -3.81309700 | 2.56701700  | -10.20195400 |
| C               | -4.11267900 | 3.02065200  | -8.92530600  |
| C               | -4.46276400 | 2.10882100  | -7.88401500  |
| C               | -4.46515400 | 0.69327700  | -8.18637000  |
| C               | -4.80911500 | 3.97106500  | -6.12991600  |
| C               | -4.01033200 | 4.41655800  | -5.06849400  |
| C               | -3.97985900 | 5.77709600  | -4.66233700  |
| C               | -4.77863400 | 6.70587600  | -5.30159600  |
| C               | -6.53638100 | 7.24600100  | -6.97047500  |

|   |             |             |              |
|---|-------------|-------------|--------------|
| C | -7.43067300 | 6.84533500  | -7.95107100  |
| C | -7.49179200 | 5.47728100  | -8.33299000  |
| C | -6.65067800 | 4.53979600  | -7.75071400  |
| C | -5.69890400 | 4.91961200  | -6.75531300  |
| C | -5.66527000 | 6.30591300  | -6.34433700  |
| H | -5.11805100 | -0.53388300 | -5.03641200  |
| H | -4.72514100 | -1.31636600 | -7.39349700  |
| H | -4.17653200 | -0.80889600 | -9.72540200  |
| H | -3.61371800 | 0.83609600  | -11.51530600 |
| H | -3.54317600 | 3.28412300  | -10.97992100 |
| H | -4.07604300 | 4.08646900  | -8.70476300  |
| H | -3.31495100 | 6.06072000  | -3.84576800  |
| H | -4.75544300 | 7.75563700  | -5.00134900  |
| H | -6.48892300 | 8.28967500  | -6.65046400  |
| H | -8.09573100 | 7.57256900  | -8.42109400  |
| H | -8.21273400 | 5.15785900  | -9.08841600  |
| H | -6.71868500 | 3.49483200  | -8.04902900  |
| C | -3.28770300 | 2.68249200  | -0.85941200  |
| C | -5.21884400 | 3.84153600  | -1.85987600  |
| C | -4.09003500 | 2.55916700  | 0.44522500   |
| H | -2.66408300 | 3.59452000  | -0.81434400  |
| H | -2.62923200 | 1.80973800  | -0.98272200  |
| C | -5.96013800 | 3.67816700  | -0.52161700  |
| H | -4.71009400 | 4.82265800  | -1.87398800  |
| H | -5.92996400 | 3.79496100  | -2.69422000  |
| H | -4.66155100 | 1.61052500  | 0.41359300   |
| H | -6.50833500 | 2.71443500  | -0.54687700  |
| N | -4.22532100 | 2.75740700  | -2.00174800  |
| O | -5.01976300 | 3.65129500  | 0.56739900   |
| C | -6.92423100 | 4.83318700  | -0.27297500  |
| H | -7.68577900 | 4.86665900  | -1.06805200  |
| H | -7.42950800 | 4.70505500  | 0.69663400   |
| H | -6.37912500 | 5.79077600  | -0.26355500  |
| C | -3.17305400 | 2.58353100  | 1.66287800   |
| H | -3.76523100 | 2.51216400  | 2.58816000   |
| H | -2.47422900 | 1.73307400  | 1.62104900   |
| H | -2.59168000 | 3.51936000  | 1.68589200   |
| C | -4.12446300 | -1.03459600 | -1.38838500  |
| H | -4.14996300 | -0.06110700 | -0.88475800  |
| H | -4.05145400 | -1.83619100 | -0.63642300  |
| C | -5.29301600 | -1.22310300 | -2.30783200  |
| C | -6.24266700 | -0.19243400 | -2.45748100  |
| C | -5.48776000 | -2.43356800 | -3.01165100  |
| C | -7.36177700 | -0.36037200 | -3.28693000  |

|   |             |             |             |
|---|-------------|-------------|-------------|
| H | -6.08957400 | 0.74890900  | -1.92841700 |
| C | -6.59948100 | -2.59724700 | -3.85059900 |
| H | -4.75461300 | -3.23239000 | -2.90365800 |
| C | -7.54232200 | -1.56171800 | -3.99007900 |
| H | -8.08255100 | 0.45307300  | -3.39383100 |
| H | -6.73426800 | -3.53587100 | -4.39310800 |
| H | -8.40804000 | -1.69218100 | -4.64314300 |
| S | -2.39041100 | -1.13929500 | -2.16870700 |
| O | -2.38325700 | -2.46565000 | -2.89872000 |
| O | -1.49608600 | -1.05612600 | -0.94768000 |

**TS-iso-6**

|    |             |             |              |
|----|-------------|-------------|--------------|
| Pd | -0.11045300 | -3.70941400 | -13.41416500 |
| P  | -1.87254800 | -2.58031300 | -14.33534600 |
| O  | -1.44436100 | -1.01473700 | -14.78965200 |
| O  | -3.18139600 | -2.22856600 | -13.32575100 |
| C  | -2.36941700 | 0.48536000  | -13.14730400 |
| C  | -1.25513600 | -0.10587400 | -13.74428900 |
| C  | 0.07699200  | 0.18948200  | -13.36649000 |
| C  | 0.30350500  | 1.10030700  | -12.35091300 |
| C  | -0.56092300 | 2.61074400  | -10.58018400 |
| C  | -1.62128800 | 3.16390600  | -9.87977100  |
| C  | -2.95594900 | 2.82274500  | -10.23216700 |
| C  | -3.21101700 | 1.95732500  | -11.28594800 |
| C  | -2.14490300 | 1.38905500  | -12.04680000 |
| C  | -0.78677900 | 1.70859500  | -11.66216400 |
| C  | -3.73131300 | 0.11234400  | -13.62385900 |
| C  | -4.09452500 | -1.23710300 | -13.68347900 |
| C  | -5.38690100 | -1.66817700 | -14.07689800 |
| C  | -6.33458200 | -0.73365600 | -14.45059700 |
| C  | -6.96133100 | 1.62164000  | -14.92555500 |
| C  | -6.62836600 | 2.96493900  | -15.00167500 |
| C  | -5.31985000 | 3.39008200  | -14.64220400 |
| C  | -4.37620300 | 2.47718300  | -14.19414100 |
| C  | -4.69034500 | 1.08851500  | -14.07969700 |
| C  | -6.01108200 | 0.65468200  | -14.48099900 |
| H  | 0.89569400  | -0.31011000 | -13.88243200 |
| H  | 1.32380200  | 1.34527000  | -12.04807600 |
| H  | 0.47103600  | 2.84497200  | -10.30817300 |
| H  | -1.43554600 | 3.84902800  | -9.05009900  |
| H  | -3.78953700 | 3.23973700  | -9.66314800  |
| H  | -4.23800100 | 1.69694500  | -11.53690200 |
| H  | -5.60236400 | -2.73710600 | -14.07801800 |
| H  | -7.33642000 | -1.04879300 | -14.75017400 |

|   |             |             |              |
|---|-------------|-------------|--------------|
| H | -7.95632900 | 1.27543700  | -15.21548100 |
| H | -7.36232800 | 3.69543600  | -15.34770800 |
| H | -5.05232500 | 4.44560600  | -14.72409800 |
| H | -3.37604700 | 2.81677600  | -13.92925300 |
| C | -2.14879900 | -4.43183000 | -16.34666500 |
| C | -3.24651500 | -2.27230600 | -16.74571600 |
| C | -1.41600600 | -4.27182400 | -17.68987200 |
| H | -3.08237800 | -5.00100800 | -16.50626200 |
| H | -1.51381800 | -4.97704100 | -15.63648100 |
| C | -2.46883000 | -2.15764200 | -18.06851700 |
| H | -4.22285400 | -2.75131300 | -16.93523400 |
| H | -3.41317400 | -1.27716400 | -16.31982100 |
| H | -0.45359600 | -3.75841500 | -17.48669900 |
| H | -1.50973400 | -1.64501400 | -17.85350500 |
| N | -2.48378800 | -3.10904600 | -15.79654700 |
| O | -2.19104600 | -3.46714500 | -18.59693800 |
| C | -3.26147000 | -1.39333900 | -19.12345000 |
| H | -3.46302700 | -0.36856400 | -18.77337000 |
| H | -2.69372000 | -1.34124800 | -20.06530300 |
| H | -4.22224200 | -1.89681700 | -19.31835500 |
| C | -1.17770800 | -5.61702200 | -18.36734600 |
| H | -0.67109300 | -5.47346400 | -19.33417200 |
| H | -0.55101900 | -6.25860400 | -17.72999000 |
| H | -2.13858500 | -6.12635500 | -18.54645200 |
| C | 2.51468800  | -4.93864400 | -11.95714000 |
| C | 1.94247000  | -4.48413600 | -13.28884900 |
| H | 3.58712100  | -5.18211100 | -12.07554800 |
| H | 2.41348200  | -4.17304600 | -11.17877800 |
| C | 1.31814600  | -5.56342000 | -14.05918000 |
| C | 1.09305700  | -5.72308100 | -15.40342600 |
| H | 0.94959300  | -6.37498300 | -13.42488700 |
| C | 2.48732700  | -3.22714300 | -13.87275200 |
| C | 3.38100600  | -2.42239700 | -13.10578400 |
| C | 2.09501300  | -2.70418900 | -15.14557800 |
| C | 3.85218200  | -1.19382200 | -13.57549000 |
| H | 3.71368000  | -2.76564500 | -12.12825400 |
| C | 2.56263500  | -1.46416700 | -15.60545800 |
| H | 1.39436200  | -3.24018200 | -15.77618600 |
| C | 3.44816700  | -0.70206100 | -14.83118600 |
| H | 4.54070900  | -0.61435800 | -12.95681500 |
| H | 2.22547400  | -1.09866800 | -16.57762900 |
| H | 3.81746300  | 0.25875500  | -15.19464400 |
| H | 1.49499400  | -5.07954600 | -16.18164300 |
| H | 0.54598100  | -6.60718000 | -15.73409500 |

|   |             |             |              |
|---|-------------|-------------|--------------|
| H | 1.98826800  | -5.83210400 | -11.60075400 |
| C | -2.27214900 | -4.72801500 | -11.13337900 |
| H | -3.04991300 | -4.09089300 | -11.57097200 |
| H | -2.46963500 | -4.91323400 | -10.06703800 |
| C | -2.02015400 | -5.97110100 | -11.92380700 |
| C | -2.50270500 | -6.08371000 | -13.24521700 |
| C | -1.20851700 | -7.00450100 | -11.40684400 |
| C | -2.19010400 | -7.20436000 | -14.03087900 |
| H | -3.13325300 | -5.29056600 | -13.64998100 |
| C | -0.88955300 | -8.12134900 | -12.19262200 |
| H | -0.81515100 | -6.91268800 | -10.39401300 |
| C | -1.37722500 | -8.22375000 | -13.50894200 |
| H | -2.57518200 | -7.27627800 | -15.04993500 |
| H | -0.25996100 | -8.91280600 | -11.78004300 |
| H | -1.12962900 | -9.09533200 | -14.11880200 |
| S | -0.69426600 | -3.64856600 | -11.10408800 |
| O | 0.22344600  | -4.39878300 | -10.16580400 |
| O | -1.13235000 | -2.28735200 | -10.63137300 |

**TS-iso-SO-1**

|    |             |             |             |
|----|-------------|-------------|-------------|
| C  | -2.40804900 | -0.20620000 | -7.58099600 |
| C  | -1.00384200 | -0.06150300 | -7.02199300 |
| H  | -3.07551400 | -0.64854400 | -6.82776200 |
| H  | -2.82555000 | 0.75366000  | -7.90691100 |
| C  | -0.16443800 | 1.03895100  | -7.35523200 |
| C  | -0.68475700 | 2.33231600  | -7.64932800 |
| H  | 0.90916900  | 0.94483700  | -7.17838200 |
| C  | -0.40504400 | -1.24129100 | -6.35542300 |
| C  | -0.95809500 | -2.53320400 | -6.52723600 |
| C  | 0.72658000  | -1.10601400 | -5.51216000 |
| C  | -0.38078500 | -3.65033400 | -5.90821900 |
| H  | -1.83630700 | -2.66931200 | -7.15774500 |
| C  | 1.29824600  | -2.22059300 | -4.89053400 |
| H  | 1.12755500  | -0.11254600 | -5.31030400 |
| C  | 0.75026200  | -3.50060400 | -5.08932700 |
| H  | -0.81946800 | -4.63816900 | -6.06290900 |
| H  | 2.16194500  | -2.08946000 | -4.23535600 |
| H  | 1.19355900  | -4.37004200 | -4.59949200 |
| H  | -1.64991700 | 2.47191300  | -8.14375300 |
| H  | 0.02608100  | 3.14904600  | -7.78428900 |
| H  | -2.38229100 | -0.88412400 | -8.45326800 |
| Pd | -1.19673200 | 1.88503700  | -5.60720400 |
| P  | -1.45585300 | 4.00875900  | -4.92855100 |
| O  | -2.95746500 | 4.66134100  | -5.30227600 |

|   |             |             |              |
|---|-------------|-------------|--------------|
| O | -0.45815700 | 5.04019800  | -5.83310700  |
| C | -2.69615400 | 5.56061500  | -7.52106600  |
| C | -3.24060100 | 4.59640300  | -6.67297000  |
| C | -4.05890600 | 3.53222400  | -7.12404400  |
| C | -4.32534000 | 3.41558800  | -8.47632200  |
| C | -3.97365100 | 4.17771600  | -10.81347500 |
| C | -3.37820100 | 5.03641300  | -11.72414400 |
| C | -2.52746700 | 6.07817900  | -11.26298700 |
| C | -2.30224500 | 6.26073100  | -9.90624600  |
| C | -2.91645200 | 5.40994700  | -8.93831000  |
| C | -3.75329100 | 4.32841900  | -9.41185800  |
| C | -1.88299300 | 6.66416800  | -6.93699800  |
| C | -0.79840200 | 6.36415500  | -6.10606200  |
| C | 0.04697300  | 7.36501200  | -5.56201200  |
| C | -0.21179500 | 8.69684700  | -5.82494900  |
| C | -1.65070300 | 10.45103700 | -6.83442900  |
| C | -2.77656400 | 10.81808100 | -7.55508900  |
| C | -3.64536100 | 9.81566800  | -8.06633100  |
| C | -3.36783400 | 8.47010400  | -7.87200800  |
| C | -2.20390500 | 8.05392500  | -7.15673900  |
| C | -1.34235000 | 9.07703400  | -6.60656700  |
| H | -4.45687100 | 2.82999400  | -6.39323700  |
| H | -4.96027700 | 2.60794500  | -8.84609700  |
| H | -4.61574400 | 3.36131500  | -11.15228500 |
| H | -3.55086400 | 4.90874200  | -12.79458300 |
| H | -2.04237000 | 6.73943200  | -11.98381600 |
| H | -1.64275700 | 7.05857100  | -9.56852000  |
| H | 0.89129200  | 7.05642800  | -4.94496300  |
| H | 0.43634700  | 9.47672500  | -5.41968600  |
| H | -0.98248600 | 11.20826900 | -6.41744600  |
| H | -3.00507900 | 11.87279300 | -7.72049000  |
| H | -4.54456000 | 10.10643000 | -8.61333300  |
| H | -4.04953700 | 7.71602500  | -8.26195900  |
| C | -0.51764700 | 3.64646800  | -2.41589200  |
| C | -1.59609700 | 5.82861300  | -2.86059400  |
| C | -1.06254100 | 3.72777900  | -0.98069500  |
| H | 0.51130300  | 4.05196300  | -2.43328700  |
| H | -0.51655700 | 2.59873800  | -2.74816700  |
| C | -2.11128100 | 5.81963400  | -1.41165300  |
| H | -0.63924100 | 6.37894100  | -2.89882500  |
| H | -2.32277300 | 6.32409400  | -3.51596900  |
| H | -2.06157400 | 3.25258500  | -0.96052300  |
| H | -3.09491900 | 5.30879400  | -1.39920400  |
| N | -1.39208900 | 4.43445600  | -3.31591000  |

|   |             |             |             |
|---|-------------|-------------|-------------|
| O | -1.19793200 | 5.10066600  | -0.56602900 |
| C | -2.23745200 | 7.23653100  | -0.86133500 |
| H | -2.96078300 | 7.81176000  | -1.46053100 |
| H | -2.58466600 | 7.20827000  | 0.18293100  |
| H | -1.26198100 | 7.74812300  | -0.89588200 |
| C | -0.12937700 | 3.03094700  | 0.00311000  |
| H | -0.52377700 | 3.11746600  | 1.02730000  |
| H | -0.04454400 | 1.96372300  | -0.25580900 |
| H | 0.87387500  | 3.48604600  | -0.02901900 |
| C | -3.70848900 | 1.56686500  | -2.72616300 |
| H | -3.16298900 | 2.51849600  | -2.68850100 |
| H | -3.54019700 | 0.98801900  | -1.80490900 |
| C | -5.14928300 | 1.74632200  | -3.06765400 |
| C | -5.58183800 | 2.91169800  | -3.73944900 |
| C | -6.09115500 | 0.72657900  | -2.80570000 |
| C | -6.92176900 | 3.05864600  | -4.13195500 |
| H | -4.85841200 | 3.70137400  | -3.94925200 |
| C | -7.43060900 | 0.87384200  | -3.19552700 |
| H | -5.76065300 | -0.18352500 | -2.30214300 |
| C | -7.85171500 | 2.03998100  | -3.86069200 |
| H | -7.23863400 | 3.96804700  | -4.64832000 |
| H | -8.14794700 | 0.07786400  | -2.98179300 |
| H | -8.89550800 | 2.15346400  | -4.16218000 |
| S | -2.77007100 | 0.55693500  | -4.05845000 |
| O | -3.42609200 | -0.81367200 | -4.04250800 |
| O | -1.31725000 | 0.57064600  | -3.46146200 |

**TS-iso-SO-2**

|   |             |             |             |
|---|-------------|-------------|-------------|
| C | 1.30884100  | -0.27945600 | -6.47507800 |
| C | 0.06787100  | 0.21086000  | -7.19860400 |
| H | 1.88419500  | -0.94863000 | -7.13961300 |
| H | 1.96520500  | 0.54603300  | -6.17331800 |
| C | 0.00148800  | 1.49306200  | -7.81481000 |
| C | 0.71864100  | 2.61864100  | -7.32302000 |
| H | -0.77946500 | 1.67695700  | -8.55568000 |
| C | -0.97879500 | -0.78754000 | -7.53180100 |
| C | -2.28324800 | -0.37452500 | -7.90591600 |
| C | -0.71219800 | -2.17642200 | -7.47253800 |
| C | -3.26905600 | -1.30986700 | -8.23386300 |
| H | -2.53312200 | 0.68607900  | -7.89379300 |
| C | -1.70121100 | -3.11313000 | -7.80610900 |
| H | 0.27533300  | -2.53022500 | -7.17755100 |
| C | -2.98198300 | -2.68619700 | -8.19120300 |
| H | -4.27007100 | -0.96682100 | -8.50427600 |



|    |             |             |              |
|----|-------------|-------------|--------------|
| H  | -1.46924000 | -4.17916200 | -7.76006200  |
| H  | -3.75405600 | -3.41705900 | -8.44013500  |
| H  | 0.51565100  | 3.59026300  | -7.77499000  |
| H  | 1.69705200  | 2.52097600  | -6.84267600  |
| H  | 1.02761600  | -0.84978200 | -5.57844300  |
| Pd | -0.66217100 | 1.99254400  | -5.78617300  |
| P  | -1.18685600 | 4.03270200  | -4.99919700  |
| O  | -2.75728000 | 4.48131600  | -5.38867600  |
| O  | -0.32916300 | 5.23939300  | -5.82585300  |
| C  | -2.56273900 | 5.42368200  | -7.59773100  |
| C  | -2.98818400 | 4.38553600  | -6.76944600  |
| C  | -3.62927100 | 3.21655400  | -7.24788300  |
| C  | -3.83399100 | 3.07146300  | -8.60820900  |
| C  | -3.50454900 | 3.88063800  | -10.93225900 |
| C  | -2.99972800 | 4.81573400  | -11.82235400 |
| C  | -2.32341300 | 5.96649500  | -11.33259800 |
| C  | -2.18049400 | 6.17750200  | -9.96860800  |
| C  | -2.70589500 | 5.24686100  | -9.02234500  |
| C  | -3.36281000 | 4.05879000  | -9.52385200  |
| C  | -1.94451000 | 6.63274800  | -6.98505300  |
| C  | -0.86219800 | 6.49467200  | -6.10897200  |
| C  | -0.20268900 | 7.60909500  | -5.52918000  |
| C  | -0.64666800 | 8.88822700  | -5.80581200  |
| C  | -2.28415100 | 10.41220400 | -6.88387600  |
| C  | -3.41876900 | 10.61028700 | -7.65522300  |
| C  | -4.10446400 | 9.49130500  | -8.20174800  |
| C  | -3.63909800 | 8.20135600  | -7.99022000  |
| C  | -2.45913700 | 7.96012000  | -7.22266000  |
| C  | -1.78514700 | 9.09855400  | -6.63835400  |
| H  | -3.94865100 | 2.46095700  | -6.53197700  |
| H  | -4.33622500 | 2.18473000  | -8.99980600  |
| H  | -4.01114300 | 2.98236200  | -11.29284700 |
| H  | -3.10945500 | 4.66597300  | -12.89821300 |
| H  | -1.90756200 | 6.69000100  | -12.03665800 |
| H  | -1.65334900 | 7.05938500  | -9.60773400  |
| H  | 0.65094900  | 7.42804800  | -4.87541500  |
| H  | -0.14150800 | 9.75438400  | -5.37326200  |
| H  | -1.75556800 | 11.25886100 | -6.43948300  |
| H  | -3.79433500 | 11.61976700 | -7.83369900  |
| H  | -5.01161900 | 9.64667800  | -8.78935000  |
| H  | -4.18300400 | 7.35591100  | -8.40837100  |
| C  | -0.29846300 | 3.64607700  | -2.46788200  |
| C  | -1.60295300 | 5.71780800  | -2.85207100  |
| C  | -0.92499100 | 3.57326900  | -1.06556800  |

|   |             |             |             |
|---|-------------|-------------|-------------|
| H | 0.67714000  | 4.16258500  | -2.39962000 |
| H | -0.15910200 | 2.62912400  | -2.86067100 |
| C | -2.18923400 | 5.55466900  | -1.43943300 |
| H | -0.72026600 | 6.38044100  | -2.80394000 |
| H | -2.35092400 | 6.16246300  | -3.52000000 |
| H | -1.86092200 | 2.98749800  | -1.13243300 |
| H | -3.10290200 | 4.93188800  | -1.51691700 |
| N | -1.20536100 | 4.39052500  | -3.37149000 |
| O | -1.24162900 | 4.89358400  | -0.58413700 |
| C | -2.51577200 | 6.90686900  | -0.81436300 |
| H | -3.26650400 | 7.43395300  | -1.42414800 |
| H | -2.91781500 | 6.76818300  | 0.20099800  |
| H | -1.60829000 | 7.52910300  | -0.75280000 |
| C | 0.03034400  | 2.92838800  | -0.06772400 |
| H | -0.42755900 | 2.90059000  | 0.93304100  |
| H | 0.25875400  | 1.89773100  | -0.38203500 |
| H | 0.97090700  | 3.49996400  | -0.01021400 |
| C | -3.33510600 | 1.43851700  | -3.04999400 |
| H | -2.86603200 | 2.43021000  | -3.03350700 |
| H | -3.09231500 | 0.88525400  | -2.12971800 |
| C | -4.79776400 | 1.50206400  | -3.33897600 |
| C | -5.35332100 | 2.63710100  | -3.97148900 |
| C | -5.64070400 | 0.40327300  | -3.05919000 |
| C | -6.71614500 | 2.67782000  | -4.30597700 |
| H | -4.70721900 | 3.48750900  | -4.19521600 |
| C | -7.00265300 | 0.44373600  | -3.39245400 |
| H | -5.21490200 | -0.48352200 | -2.58700500 |
| C | -7.54665300 | 1.58117000  | -4.01689200 |
| H | -7.12921100 | 3.56595400  | -4.79047300 |
| H | -7.64177200 | -0.41293100 | -3.16542600 |
| H | -8.60804200 | 1.61217500  | -4.27335800 |
| S | -2.36409800 | 0.47401200  | -4.39383800 |
| O | -2.91818500 | -0.93675700 | -4.31969800 |
| O | -0.90265600 | 0.58076700  | -3.81090800 |

**TS-iso-SO-3**

|    |             |             |             |
|----|-------------|-------------|-------------|
| C  | -0.10881000 | -0.00684300 | -6.98662500 |
| C  | -0.64237000 | 1.06246700  | -7.74710400 |
| C  | -0.15762300 | 2.39913000  | -7.61352500 |
| H  | -1.59979300 | 0.90134700  | -8.24917200 |
| C  | -0.88623700 | -1.29725800 | -6.87287100 |
| H  | -0.70507900 | 3.19652400  | -8.11761200 |
| H  | 0.89350300  | 2.60646900  | -7.40210500 |
| Pd | -0.95356300 | 1.80791500  | -5.69788300 |

|   |             |             |              |
|---|-------------|-------------|--------------|
| P | -1.38547100 | 3.89041600  | -4.96457000  |
| O | -2.88571700 | 4.48274700  | -5.42747000  |
| O | -0.37582600 | 4.99103000  | -5.76720400  |
| C | -2.50404500 | 5.43214000  | -7.60786500  |
| C | -3.05941000 | 4.42607200  | -6.81777700  |
| C | -3.77254600 | 3.32196300  | -7.34503400  |
| C | -3.92353800 | 3.21268200  | -8.71568700  |
| C | -3.42861300 | 4.02913700  | -11.00827200 |
| C | -2.80721200 | 4.93101900  | -11.85789300 |
| C | -2.05505400 | 6.00995400  | -11.31759900 |
| C | -1.95407500 | 6.18604600  | -9.94515300  |
| C | -2.60002900 | 5.29078100  | -9.03998300  |
| C | -3.33285600 | 4.17134500  | -9.59177800  |
| C | -1.79379300 | 6.56424200  | -6.94908700  |
| C | -0.76139500 | 6.30128900  | -6.04228900  |
| C | -0.01122500 | 7.33205900  | -5.41981600  |
| C | -0.31565500 | 8.65428100  | -5.68222300  |
| C | -1.75366600 | 10.35525900 | -6.78002300  |
| C | -2.83348200 | 10.68090100 | -7.58599300  |
| C | -3.60773400 | 9.64736800  | -8.18046700  |
| C | -3.28297400 | 8.31325400  | -7.98045200  |
| C | -2.16267400 | 7.94036900  | -7.17704700  |
| C | -1.39849500 | 8.99373000  | -6.54580900  |
| H | -4.18716400 | 2.58622000  | -6.65673600  |
| H | -4.47793300 | 2.37574900  | -9.14535400  |
| H | -3.99446500 | 3.18404500  | -11.40734200 |
| H | -2.88315400 | 4.80898800  | -12.94012900 |
| H | -1.54759300 | 6.70540400  | -11.98917100 |
| H | -1.36926300 | 7.01285000  | -9.54520200  |
| H | 0.79835000  | 7.05420200  | -4.74436900  |
| H | 0.25916300  | 9.45719600  | -5.21596400  |
| H | -1.15889400 | 11.13619600 | -6.30029300  |
| H | -3.09831300 | 11.72633100 | -7.75610600  |
| H | -4.47176400 | 9.90470200  | -8.79650700  |
| H | -3.89305900 | 7.53460100  | -8.43571800  |
| C | -0.53540000 | 3.54753900  | -2.42530400  |
| C | -1.77370100 | 5.64103200  | -2.86975100  |
| C | -1.12104300 | 3.55998700  | -1.00438500  |
| H | 0.45505300  | 4.03952500  | -2.40908000  |
| H | -0.43529700 | 2.50968700  | -2.77323200  |
| C | -2.32599200 | 5.56570800  | -1.43684600  |
| H | -0.86174400 | 6.26428600  | -2.87322000  |
| H | -2.51879600 | 6.08976300  | -3.53783000  |
| H | -2.07695200 | 3.00282700  | -1.01504000  |

|   |             |             |             |
|---|-------------|-------------|-------------|
| H | -3.26438600 | 4.97593500  | -1.46101400 |
| N | -1.44970000 | 4.27379300  | -3.33969400 |
| O | -1.38104700 | 4.91006800  | -0.57455800 |
| C | -2.58506100 | 6.95746500  | -0.86893900 |
| H | -3.33035300 | 7.48475900  | -1.48513800 |
| H | -2.96645100 | 6.88149900  | 0.16098100  |
| H | -1.65345800 | 7.54590500  | -0.85754200 |
| C | -0.15637500 | 2.92849300  | -0.00685700 |
| H | -0.58315300 | 2.96097700  | 1.00749200  |
| H | 0.02837900  | 1.87789400  | -0.28115700 |
| H | 0.80358300  | 3.46980700  | -0.00399900 |
| C | -3.49394400 | 1.24460900  | -2.87436300 |
| H | -3.01949400 | 2.23346200  | -2.83345500 |
| H | -3.32702300 | 0.69444000  | -1.93551300 |
| C | -4.92728000 | 1.31947400  | -3.28155700 |
| C | -5.39651100 | 2.42746800  | -4.02269700 |
| C | -5.81887200 | 0.25652600  | -3.01615700 |
| C | -6.72285800 | 2.47619800  | -4.48017300 |
| H | -4.71322100 | 3.25191100  | -4.23297400 |
| C | -7.14552100 | 0.30620600  | -3.46994800 |
| H | -5.46064300 | -0.60967100 | -2.45687300 |
| C | -7.60310500 | 1.41534200  | -4.20471500 |
| H | -7.06817900 | 3.34287000  | -5.04913300 |
| H | -7.82417800 | -0.52183900 | -3.25179400 |
| H | -8.63662400 | 1.45255600  | -4.55634300 |
| S | -2.43947500 | 0.27736600  | -4.15028300 |
| O | -2.94186300 | -1.15483400 | -4.05935200 |
| O | -1.00069600 | 0.44931000  | -3.53886900 |
| C | 1.30641100  | -0.03458700 | -6.52196400 |
| C | 2.35175800  | 0.41141300  | -7.36346900 |
| C | 1.62576500  | -0.55331900 | -5.24569200 |
| C | 3.68490500  | 0.34962100  | -6.93333700 |
| H | 2.11327600  | 0.78487700  | -8.36039000 |
| C | 2.95873000  | -0.60316700 | -4.81664400 |
| H | 0.81758400  | -0.85650000 | -4.58097800 |
| C | 3.99273400  | -0.15420800 | -5.65784900 |
| H | 4.48320600  | 0.68821700  | -7.59713400 |
| H | 3.19089800  | -0.99046400 | -3.82226900 |
| H | 5.03113900  | -0.20050900 | -5.32321400 |
| H | -0.37231000 | -2.09161700 | -7.44320400 |
| H | -0.94469800 | -1.62974800 | -5.82599300 |
| H | -1.91121000 | -1.18090800 | -7.25353900 |
